# Supplementary material for: Transcriptome Analysis of Rainbow Trout (Oncorhynchus mykiss) Eggs Subjected to the High Hydrostatic Pressure Treatment
Source: Int J Genomics. 2018 Aug 26;2018:5197126. doi: 10.1155/2018/5197126 (PMC6129359; doi:10.1155/2018/5197126)
Supplement: Supplementary 2 — File Data: results of expression analysis of rainbow trout eggs subjected to the high hydrostatic pressure (HHP) shock and untreated eggs. [file 5197126.f2.xls]

## Sheet: DATE-DESeq2-results-with-normal
Transcript	gene description	baseMean	log2FoldChange	lfcSE	stat	p-value	p-adj	treated1	treated2	treated3	untreated1	untreated2	untreated3
C29972_c2_seq1_	PREDICTED: protein transport protein Sec31A-like [Oreochromis niloticus]	807.49	-2.19144	0.755809	-2.89947	0.00373796	1	1411.93	665.512	818.053	1073.05	793.532	82.8613
C169673_c0_seq1_	insulin-like growth factor 1b receptor [Oncorhynchus kisutch]	66.7283	2.17286	0.776233	2.79924	0.00512233	1	7.43121	48.5992	60.683	49.7202	35.9898	197.947
C63960_c0_seq1_	PREDICTED: telomere-associated protein RIF1 [Oreochromis niloticus]	383.985	2.04502	0.733263	2.78894	0.00528815	1	95.5442	414.581	360.597	230.521	352.876	849.789
C153473_c0_seq1_	IGF-I receptor subtype a [Cyprinus carpio]	123.582	2.13467	0.76671	2.78419	0.00536614	1	22.2936	78.3538	144.706	91.3043	80.7577	324.08
C9983_c0_seq1_	PREDICTED: FH1/FH2 domain-containing protein 3 [Danio rerio]	270.05	2.06055	0.741861	2.77755	0.0054771	1	50.9569	325.317	240.398	163.625	313.375	526.63
C93043_c1_seq1_	MAM domain-containing glycosylphosphatidylinositol anchor protein 1 [Dicentrarchus labrax]	98.4029	2.09023	0.757585	2.75906	0.00579671	1	11.6776	104.141	114.364	89.4963	93.0469	177.692
C96308_c0_seq1_	PREDICTED: centromere protein F [Oreochromis niloticus]	1329.72	1.85353	0.673311	2.75286	0.0059078	1	406.594	1473.85	1256.84	1318.94	1195.56	2326.56
C35448_c1_seq1_	PREDICTED: FH1/FH2 domain-containing protein 3 [Oreochromis niloticus]	362.463	1.99481	0.74566	2.67522	0.00746794	1	77.4969	404.663	374.601	158.201	419.589	740.228
C78059_c0_seq1_	PREDICTED: histone-lysine N-methyltransferase SETD2-like [Oreochromis niloticus]	606.503	2.03545	0.761834	2.67178	0.00754499	1	121.023	847.015	212.39	479.122	565.304	1414.17
C39441_c0_seq1_	Male-specific lethal 3-like 1 [Salmo salar] gb	217.769	-1.92029	0.720745	-2.66431	0.00771472	1	350.329	259.857	179.715	280.241	191.361	45.1134
C11690_c0_seq1_	45 kDa calcium-binding protein precursor [Danio rerio] sp	438.629	2.05752	0.773085	2.66145	0.00778059	1	22.2936	570.297	586.991	424.882	286.163	741.149
C14637_c0_seq1_	PREDICTED: 5'-AMP-activated protein kinase subunit beta-2-like [Oreochromis niloticus]	163.887	-1.93198	0.728409	-2.65234	0.00799369	1	284.509	173.569	114.364	158.201	217.695	34.9859
C25332_c0_seq1_	PREDICTED: putative phospholipase B-like 2 isoform 1 [Oreochromis niloticus]	257.5	2.00122	0.756466	2.64549	0.00815719	1	27.6016	218.201	378.102	327.249	207.161	386.686
C31032_c0_seq1_	PREDICTED: glutamate-rich WD repeat-containing protein 1-like [Oreochromis niloticus]	109.445	-1.97983	0.753823	-2.62638	0.00862972	1	173.041	137.863	84.0226	134.697	113.236	13.8102
C54545_c0_seq1_	PREDICTED: tubulin polyglutamylase TTLL4 [Danio rerio]	52.6326	2.02018	0.769234	2.62623	0.00863372	1	10.616	35.7056	47.8462	33.4481	49.1568	139.023
C59768_c0_seq1_	PREDICTED: required for meiotic nuclear division protein 1 homolog [Oreochromis niloticus]	200.179	1.78193	0.678654	2.62568	0.00864764	1	64.7577	189.438	213.557	204.305	177.316	351.7
C18236_c0_seq1_	beta-sarcoglycan [Danio rerio] gb	158.136	1.94368	0.741443	2.62148	0.00875496	1	35.0329	145.798	172.713	84.0723	202.772	308.428
C96523_c0_seq1_	Ras-like protein family member 11A-like [Esox lucius]	213.417	1.97064	0.752488	2.61883	0.00882328	1	22.2936	216.217	210.057	277.529	260.707	293.697
C28163_c0_seq1_	glutathione synthetase [Danio rerio] gb	268.979	-1.85983	0.711457	-2.61411	0.00894592	1	468.166	285.644	168.045	291.993	330.053	69.9718
C75169_c0_seq1_	PREDICTED: histone-lysine N-methyltransferase SETD2-like [Oreochromis niloticus]	2587.87	1.77308	0.681476	2.60182	0.00927305	1	931.025	3139.11	1725.96	2278.99	2485.05	4967.08
C3015_c2_seq1_	PREDICTED: phosphatidylinositol-binding clathrin assembly protein-like [Oreochromis niloticus]	328.93	1.83387	0.706476	2.5958	0.00943717	1	116.776	358.047	292.912	213.345	282.652	709.845
C24439_c0_seq1_	PREDICTED: lipopolysaccharide-responsive and beige-like anchor protein-like [Oreochromis niloticus]	502.105	1.77087	0.68364	2.59035	0.00958778	1	142.255	699.234	484.297	452.906	447.678	786.262
C37829_c0_seq1_	PREDICTED: PI-PLC X domain-containing protein 1-like [Oreochromis niloticus]	27.671	1.99374	0.772296	2.58157	0.00983524	1	2.1232	16.861	23.3396	14.4641	25.4562	83.782
C38573_c1_seq1_	PREDICTED: E1A-binding protein p400-like [Oreochromis niloticus]	71.1623	-1.94952	0.757153	-2.5748	0.0100298	1	169.856	45.6238	57.1821	86.7843	50.0346	17.4929
C30685_c0_seq1_	PREDICTED: golgin subfamily A member 4 [Oreochromis niloticus]	8.63601	1.54536	0.600409	2.57385	0.0100575	1	0	0.991821	1.16698	0.904003	0.877801	47.8754
C15722_c0_seq1_	PREDICTED: LOW QUALITY PROTEIN: pseudopodium-enriched atypical kinase 1-like [Oreochromis niloticus]	165.433	1.84175	0.716201	2.57155	0.0101244	1	45.6489	189.438	157.542	102.152	193.994	303.825
C44521_c3_seq1_	CS022 protein [Salmo salar] gb	149.808	-1.83019	0.712445	-2.56888	0.0102028	1	306.803	131.912	112.03	180.801	118.503	48.7961
C54224_c0_seq1_	Para-hydroxybenzoate--polyprenyltransferase, mitochondrial precursor [Salmo salar]	91.1671	1.89402	0.737363	2.56864	0.0102097	1	20.1704	99.1821	79.3547	119.328	62.3239	166.643
C27654_c0_seq1_	novel protein similar to vertebrate asp (abnormal spindle)-like, microcephaly associated (Drosophila) (ASPM) [Danio rerio]	768.183	-1.78753	0.699111	-2.55687	0.010562	1	1463.95	529.632	617.333	1084.8	658.351	255.029
C52574_c0_seq1_	Translation initiation factor IF-2, mitochondrial precursor [Salmo salar]	162.995	1.81039	0.708528	2.55514	0.0106145	1	39.2793	216.217	149.374	134.697	185.216	253.187
C104093_c0_seq1_	PREDICTED: remodeling and spacing factor 1-like [Oreochromis niloticus]	890.114	1.71744	0.672155	2.55512	0.0106151	1	337.589	1060.26	664.012	690.659	920.813	1667.35
C82171_c0_seq1_	PREDICTED: threonine aspartase 1 [Oreochromis niloticus]	134.044	-1.98321	0.77624	-2.55489	0.010622	1	302.557	138.855	30.3415	185.321	134.304	12.8895
C29887_c1_seq1_	PREDICTED: fascin-like [Oreochromis niloticus]	218.442	-1.98235	0.776309	-2.55356	0.0106627	1	602.99	122.986	64.1839	399.57	87.7801	33.1445
C17070_c0_seq1_	PREDICTED: histone-lysine N-methyltransferase MLL5 [Oreochromis niloticus]	166.283	-1.77108	0.693976	-2.55208	0.0107082	1	348.205	135.879	144.706	148.257	157.126	63.527
C30022_c0_seq1_	transmembrane protein 201 [Danio rerio] sp	35.1619	1.9659	0.772342	2.54537	0.0109161	1	6.36961	17.8528	30.3415	16.2721	14.9226	125.213
C17148_c0_seq1_	PREDICTED: LOW QUALITY PROTEIN: ral GTPase-activating protein subunit beta [Danio rerio]	297.926	1.83151	0.719579	2.54525	0.01092	1	83.8665	353.088	200.721	195.265	398.522	556.092
C28934_c0_seq1_	PREDICTED: ubiA prenyltransferase domain-containing protein 1-like [Oreochromis niloticus]	96.0827	-1.89108	0.745477	-2.53674	0.0111889	1	166.671	133.896	71.1858	68.7043	117.625	18.4136
C206643_c0_seq1_	PREDICTED: nucleolar pre-ribosomal-associated protein 1 [Oreochromis niloticus]	49.7627	-1.94975	0.769117	-2.53505	0.011243	1	158.179	14.8773	15.1707	73.2243	31.6008	5.52409
C92796_c0_seq1_	unnamed protein product [Tetraodon nigroviridis]	28.1631	1.91589	0.759569	2.52234	0.0116576	1	3.18481	7.93457	10.5028	13.5601	31.6008	102.196
C2408_c7_seq1_	Suppressor of IKK-epsilon [Salmo salar] gb	183.672	1.88599	0.748552	2.51952	0.0117514	1	29.7249	96.2066	200.721	243.177	244.029	288.173
C10055_c1_seq1_	PREDICTED: glucosylceramidase-like [Oreochromis niloticus]	50.4751	-1.93077	0.767032	-2.5172	0.0118291	1	93.421	44.6319	42.0113	76.8403	39.501	6.44477
C92766_c0_seq1_	PREDICTED: hypothetical protein LOC100698334 [Oreochromis niloticus]	58.3553	1.9525	0.776179	2.51553	0.0118855	1	2.1232	70.4193	66.5179	49.7202	51.7902	109.561
C182454_c0_seq1_	type 1 insulin-like growth factor receptor [Paralichthys olivaceus]	42.8197	1.95115	0.776173	2.51381	0.0119436	1	8.49282	41.6565	31.5085	14.4641	25.4562	135.34
C28285_c0_seq1_	PREDICTED: thyroid receptor-interacting protein 11 [Oreochromis niloticus]	87.5125	1.8576	0.739657	2.51143	0.0120243	1	22.2936	61.4929	112.03	57.8562	98.3137	173.088
C181132_c0_seq1_	zinc finger CCCH-type containing 15 [Danio rerio]	111.362	1.90634	0.759691	2.50936	0.0120949	1	18.0472	128.937	136.537	47.0082	136.937	200.709
C111907_c0_seq1_	Apolipoprotein-L3 [Salmo salar] gb	37.2303	-1.94006	0.774798	-2.50396	0.0122812	1	107.222	22.8119	10.5028	34.3521	43.89	4.60341
C52069_c0_seq1_	Para-hydroxybenzoate--polyprenyltransferase, mitochondrial precursor [Salmo salar]	1129.35	1.65887	0.662767	2.50294	0.0123166	1	492.583	1229.86	815.719	1069.44	933.102	2235.41
C366_c1_seq1_	Neuroblast differentiation-associated protein AHNAK [Salmo salar]	65.3478	-1.93833	0.77536	-2.4999	0.0124227	1	141.193	31.7383	37.3434	113	61.4461	7.36545
C67988_c0_seq1_	PREDICTED: telomere-associated protein RIF1 [Oreochromis niloticus]	3570.6	1.5461	0.618966	2.49788	0.0124939	1	1579.66	4044.65	2899.95	3375.55	3481.36	6042.43
C70048_c0_seq1_	PREDICTED: E3 ubiquitin-protein ligase MYLIP-A-like [Oreochromis niloticus]	932.787	1.65037	0.660998	2.49678	0.0125325	1	330.158	898.59	1149.48	649.074	1059.51	1509.92
C2003_c12_seq1_	PREDICTED: GPI-anchor transamidase-like [Oreochromis niloticus]	96.002	-1.9139	0.767094	-2.495	0.0125959	1	198.52	120.01	31.5085	107.576	101.825	16.5723
C111020_c0_seq1_	PREDICTED: probable helicase senataxin [Danio rerio]	257.489	1.82051	0.73063	2.49171	0.0127131	1	66.8809	402.679	148.207	191.649	265.974	469.548
C21456_c1_seq1_	PREDICTED: wings apart-like protein homolog [Oreochromis niloticus]	61.2013	-1.90718	0.76781	-2.48393	0.0129942	1	143.316	55.542	29.1745	86.7843	39.501	12.8895
C107626_c0_seq1_	PREDICTED: probable helicase senataxin [Danio rerio]	227.636	1.68119	0.677721	2.48066	0.013114	1	97.6674	228.119	191.385	180.801	200.139	467.706
C38839_c0_seq1_	ubiquitin specific peptidase like 1 [Danio rerio] gb	177.334	1.86078	0.750268	2.48015	0.0131327	1	39.2793	105.133	313.918	122.944	144.837	337.89
C51926_c0_seq1_	Centrosomal protein of 27 kDa [Salmo salar] gb	367.332	-1.78692	0.720884	-2.47878	0.0131831	1	634.838	403.671	187.884	528.842	350.242	98.5129
C14340_c1_seq1_	V-type ATPase B subunit [Oncorhynchus mykiss] ref	463.818	-1.77697	0.717024	-2.47826	0.0132027	1	997.906	400.696	231.062	572.234	413.444	167.564
C62801_c0_seq1_	PREDICTED: outer dense fiber protein 3-like protein 2-like [Oreochromis niloticus]	69.0936	-1.88952	0.765421	-2.4686	0.0135643	1	108.283	75.3784	44.3453	94.9204	84.2689	7.36545
C12563_c0_seq1_	Calponin-2 [Salmo salar]	222.664	1.56934	0.635825	2.46819	0.0135797	1	89.1746	220.184	236.897	198.881	230.862	359.986
C97183_c0_seq1_	uncharacterized protein LOC100145372 [Xenopus (Silurana) tropicalis] gb	29.7366	-1.907	0.774337	-2.46275	0.0137877	1	76.4353	17.8528	30.3415	29.8321	18.4338	5.52409
C16861_c0_seq1_	PREDICTED: myosin light chain kinase, smooth muscle-like [Meleagris gallopavo]	219.461	1.77565	0.721132	2.46231	0.0138047	1	57.3265	270.767	114.364	225.097	280.018	369.193
C41575_c0_seq1_	PREDICTED: hypothetical protein LOC100696548 [Oreochromis niloticus]	112.368	1.88737	0.768449	2.45608	0.0140462	1	16.9856	52.5665	128.368	66.8963	194.872	214.519
C254125_c0_seq1_	fructose-bisphosphate aldolase C [Salmo salar] gb	52.8439	-1.90479	0.775754	-2.4554	0.0140727	1	108.283	37.6892	53.6811	80.4563	35.112	1.84136
C67199_c0_seq1_	unnamed protein product [Tetraodon nigroviridis]	125.832	-1.70911	0.696366	-2.45433	0.0141146	1	233.552	108.108	117.865	159.105	92.1691	44.1927
C69182_c0_seq1_	PREDICTED: hypothetical protein LOC100536880 [Danio rerio]	61.7798	1.88342	0.767603	2.45363	0.0141422	1	8.49282	86.2884	30.3415	52.4322	79.8799	113.244
C26397_c1_seq1_	PREDICTED: protein FAM117A-like [Danio rerio]	163.743	-1.87427	0.764647	-2.45115	0.01424	1	323.789	147.781	57.1821	280.241	143.082	30.3825
C28958_c0_seq1_	small ubiquitin-related modifier 1 precursor [Oncorhynchus mykiss] sp	114.132	1.8963	0.774447	2.44859	0.0143416	1	11.6776	143.814	147.04	31.6401	135.181	215.439
C58259_c0_seq1_	PREDICTED: histone-lysine N-methyltransferase EZH2-like [Oreochromis niloticus]	23.0139	1.80397	0.737058	2.44753	0.0143839	1	1.0616	16.861	2.33396	20.7921	11.4114	85.6234
C85439_c0_seq1_	PREDICTED: protein PAT1 homolog 2-like isoform 1 [Danio rerio]	31.8839	-1.88944	0.773355	-2.44318	0.0145585	1	84.9282	36.6974	8.16886	28.0241	30.723	2.76204
C15327_c0_seq1_	unnamed protein product [Tetraodon nigroviridis]	202.634	-1.75439	0.718563	-2.44153	0.0146251	1	391.731	279.693	140.038	216.961	122.014	65.3684
C41662_c0_seq1_	Suppressor of cytokine signaling 6 [Dicentrarchus labrax]	105.982	1.79788	0.736542	2.44097	0.014648	1	27.6016	153.732	63.017	78.6483	115.87	197.026
C12609_c0_seq1_	DNA-(apurinic or apyrimidinic site) lyase [Salmo salar] gb	120.945	-1.86791	0.766518	-2.43688	0.0148148	1	219.752	141.83	39.6773	139.217	166.782	18.4136
C193529_c0_seq1_	PREDICTED: transmembrane protein 169-like [Oreochromis niloticus]	44.5457	1.86304	0.76565	2.43328	0.0149628	1	9.55442	33.7219	58.349	43.3922	22.8228	99.4336
C84761_c0_seq1_	proteasome activator complex subunit 4 [Danio rerio] gb	320.461	-1.83907	0.755869	-2.43306	0.0149719	1	626.345	278.702	103.861	492.682	349.365	71.8132
C8075_c2_seq1_	cell division cycle 25C [Xenopus (Silurana) tropicalis] gb	318.566	-1.80809	0.743287	-2.43255	0.0149927	1	573.265	302.505	144.706	543.306	272.118	75.4959
C201851_c0_seq1_	unnamed protein product [Tetraodon nigroviridis]	213.006	-1.87283	0.770177	-2.43168	0.0150289	1	401.286	174.56	65.3509	388.721	216.817	31.3032
C41805_c0_seq1_	PREDICTED: fasciculation and elongation protein zeta-2-like [Oreochromis niloticus]	191.683	1.83383	0.754581	2.43026	0.0150881	1	62.6345	82.3211	253.235	150.969	118.503	482.437
C25018_c0_seq1_	PREDICTED: putative uncharacterized zinc finger protein 814-like [Anolis carolinensis]	293.476	1.74935	0.721201	2.4256	0.015283	1	102.975	168.61	416.612	199.785	262.462	610.412
C67134_c0_seq1_	Sox17 protein [Dicentrarchus labrax] emb	20.2775	1.86998	0.772284	2.42137	0.0154621	1	1.0616	23.8037	14.0038	16.2721	14.0448	52.4788
C70498_c0_seq1_	Leucine-rich repeat-containing protein 42 [Oncorhynchus mykiss]	630.282	1.54141	0.63711	2.41937	0.0155473	1	222.936	574.264	736.365	576.754	784.754	886.616
C22621_c0_seq1_	P-selectin precursor [Salmo salar]	31.4486	1.85232	0.765696	2.41913	0.0155578	1	7.43121	23.8037	33.8424	26.2161	22.8228	74.5752
C6196_c5_seq1_	PREDICTED: protein unc-45 homolog B-like [Oreochromis niloticus]	52.527	-1.87265	0.774357	-2.41832	0.0155922	1	82.8049	59.5093	51.3471	68.7043	50.0346	2.76204
C75111_c0_seq1_	A-kinase anchor protein 9 [Gallus gallus]	108.285	1.85476	0.767078	2.41795	0.015608	1	15.924	135.879	36.1764	143.737	124.648	193.343
C37445_c0_seq1_	PREDICTED: sarcoplasmic/endoplasmic reticulum calcium ATPase 2-like [Oreochromis niloticus]	90.8028	-1.87684	0.776349	-2.41753	0.0156265	1	232.491	47.6074	25.6736	166.337	57.057	15.6516
C139535_c0_seq1_	Cholinergic receptor, nicotinic, alpha polypeptide 7 [Danio rerio] gb	46.2321	-1.82976	0.758704	-2.41169	0.0158789	1	82.8049	46.6156	61.85	50.6242	27.2118	8.28613
C57671_c0_seq1_	rhomboid-related protein 2 [Danio rerio] gb	661.107	-1.47287	0.612032	-2.40651	0.0161056	1	984.105	644.684	578.822	675.291	808.454	275.284
C61073_c0_seq1_	NADP-dependent malic enzyme, mitochondrial precursor [Salmo salar]	39.6464	1.85642	0.773866	2.39889	0.0164447	1	6.36961	29.7546	33.8424	18.0801	61.4461	88.3854
C35512_c1_seq1_	PREDICTED: rap1 GTPase-GDP dissociation stimulator 1-A-like [Oreochromis niloticus]	331.4	-1.83599	0.765727	-2.39771	0.016498	1	717.643	224.152	109.696	615.626	245.784	75.4959
C88256_c0_seq1_	Telomeric repeat-binding factor 2 [Salmo salar]	133.72	-1.74379	0.727473	-2.39705	0.0165278	1	183.657	147.781	100.36	202.497	141.326	26.6998
C47284_c5_seq1_	PREDICTED: tripartite motif-containing protein 3-like [Oreochromis niloticus]	68.7145	1.83339	0.765652	2.39455	0.0166409	1	18.0472	41.6565	40.8443	40.6802	105.336	165.723
C27576_c2_seq1_	notch 1 precursor [Oncorhynchus mykiss] dbj	721.186	1.46489	0.613239	2.38877	0.016905	1	340.774	838.089	599.828	614.722	729.452	1204.25
C33192_c0_seq1_	Peptidyl-prolyl cis-trans isomerase-like 1 [Salmo salar]	80.8907	-1.64061	0.687348	-2.38686	0.0169929	1	134.823	68.4356	73.5198	94.9204	86.0245	27.6204
C85201_c0_seq1_	PREDICTED: protein phosphatase PTC7 homolog [Oreochromis niloticus]	287.896	1.85208	0.776356	2.3856	0.0170512	1	37.1561	247.955	429.449	37.9681	342.342	632.508
C189465_c0_seq1_	RecName: Full=Protein spire homolog 1 emb	202.464	1.60341	0.673511	2.38067	0.0172813	1	89.1746	229.111	169.212	140.121	193.116	394.052
C56800_c0_seq1_	xylulose kinase [Danio rerio] gb	29.2942	-1.82217	0.765999	-2.37882	0.0173683	1	76.4353	24.7955	11.6698	17.1761	44.7678	0.920682
C103887_c0_seq1_	metallophosphoesterase 1 [Ictalurus punctatus] gb	41.3527	1.78207	0.749413	2.37795	0.0174091	1	3.18481	9.91821	65.3509	4.52002	30.723	134.42
C82474_c0_seq1_	transcription cofactor vestigial-like protein 4 [Danio rerio] gb	20.3411	1.76045	0.740797	2.37643	0.0174811	1	0	13.8855	7.00188	18.9841	14.0448	68.1304
C44134_c0_seq1_	unnamed protein product [Tetraodon nigroviridis]	189.34	-1.71336	0.721124	-2.37595	0.0175037	1	305.741	112.076	178.548	306.457	182.583	50.6375
C42598_c0_seq1_	transmembrane protein 106b [Ictalurus punctatus] gb	271.718	1.56161	0.65768	2.37442	0.0175767	1	87.0514	308.456	241.565	268.489	354.632	370.114
C59645_c0_seq1_	PREDICTED: tyrosine-protein phosphatase non-receptor type 9-like [Oreochromis niloticus]	112.136	-1.68653	0.710645	-2.37324	0.0176329	1	184.719	111.084	138.871	137.409	67.5907	33.1445
C77320_c0_seq1_	PREDICTED: oxysterol-binding protein-related protein 1-like [Oreochromis niloticus]	64.2902	-1.84011	0.775722	-2.37213	0.0176859	1	173.041	23.8037	26.8406	122.04	28.9674	11.0482
C76721_c0_seq1_	PREDICTED: rapamycin-insensitive companion of mTOR [Danio rerio]	24.8977	-1.841	0.776239	-2.37169	0.0177068	1	67.9425	25.7873	11.6698	26.2161	13.167	4.60341
C95001_c0_seq1_	PREDICTED: dmX-like protein 2-like, partial [Danio rerio]	309.799	1.67922	0.708927	2.36868	0.0178516	1	100.852	423.507	168.045	240.465	382.721	543.202
C160933_c0_seq1_	PREDICTED: protocadherin-23-like [Oreochromis niloticus]	70.3723	-1.70621	0.720872	-2.36687	0.0179392	1	142.255	49.591	72.3528	82.2643	50.9124	24.8584
C94639_c0_seq1_	PREDICTED: deubiquitinating protein VCIP135-like [Oreochromis niloticus]	83.8838	1.62431	0.687037	2.36422	0.0180681	1	31.8481	92.2393	91.0245	69.6083	67.5907	150.992
C195201_c0_seq1_	PREDICTED: melanoregulin-like isoform 2 [Nomascus leucogenys]	91.9707	1.80146	0.762695	2.36197	0.0181782	1	21.232	54.5501	168.045	53.3362	64.0795	190.581
C14039_c0_seq1_	PREDICTED: myosin-9-like [Oreochromis niloticus]	2468.76	1.48547	0.628985	2.36169	0.0181918	1	966.058	2154.23	2307.12	2312.44	3486.62	3586.05
C46190_c0_seq1_	Uridine 5-monophosphate synthase [Salmo salar] gb	51.7331	-1.72319	0.729999	-2.36054	0.0182483	1	89.1746	56.5338	36.1764	50.6242	64.0795	13.8102
C86777_c0_seq1_	PREDICTED: lateral signaling target protein 2 homolog [Oreochromis niloticus]	877.512	-1.5001	0.636249	-2.35773	0.0183872	1	1296.22	954.132	619.667	1072.15	982.259	340.652
C109534_c0_seq1_	PREDICTED: inositol 1,4,5-trisphosphate receptor type 3 [Gallus gallus]	388.56	1.56883	0.666543	2.35369	0.0185883	1	151.809	504.837	242.732	422.17	361.654	648.16
C80537_c0_seq1_	PREDICTED: hypothetical protein LOC100703750 [Oreochromis niloticus]	53.3606	1.79747	0.763886	2.35307	0.0186192	1	5.30801	72.4029	46.6792	64.1842	57.9348	73.6545
C86622_c0_seq1_	G2e3 protein [Danio rerio]	9.6879	1.4834	0.631408	2.34935	0.0188063	1	0	0.991821	1.16698	8.13603	0.877801	46.9548
C5831_c0_seq1_	solute carrier family 27 member 2 [Rachycentron canadum]	88.2095	1.72256	0.733258	2.34918	0.0188147	1	18.0472	95.2148	117.865	58.7602	113.236	126.133
C2525_c2_seq1_	PREDICTED: hypothetical protein LOC100699980 [Oreochromis niloticus]	493.87	1.42498	0.607051	2.34738	0.0189062	1	219.752	542.526	530.976	386.913	535.458	747.593
C44475_c2_seq1_	PREDICTED: serine/threonine-protein kinase Nek3-like [Oreochromis niloticus]	153.799	1.81822	0.774601	2.34731	0.0189097	1	9.55442	155.716	291.745	26.2161	123.77	315.794
C50750_c0_seq1_	serine-threonine protein kinase, plant-type, putative [Ricinus communis] gb	52.5836	-1.75457	0.747968	-2.34578	0.0189873	1	125.269	42.6483	36.1764	58.7602	34.2342	18.4136
C20083_c0_seq1_	PREDICTED: neuropathy target esterase-like [Oreochromis niloticus]	91.2186	-1.81837	0.775431	-2.34498	0.0190279	1	216.567	78.3538	17.5047	141.025	76.3687	17.4929
C150124_c0_seq1_	PREDICTED: talin-2-like [Oreochromis niloticus]	295.81	1.62685	0.694295	2.34317	0.0191205	1	105.099	362.015	152.874	350.753	294.063	510.058
C88859_c0_seq1_	PREDICTED: ATPase family AAA domain-containing protein 2B-like [Danio rerio]	485.293	1.58161	0.675225	2.34234	0.019163	1	227.183	372.925	590.492	323.633	416.078	981.446
C50101_c0_seq1_	Retinoblastoma-binding protein 6 [Salmo salar]	130.721	-1.67934	0.716955	-2.34232	0.0191643	1	201.704	116.043	85.1896	200.689	145.715	34.9859
C66_c69_seq1_	PREDICTED: LOW QUALITY PROTEIN: transcriptional regulator ATRX-like [Oreochromis niloticus]	199.665	1.53504	0.655433	2.34202	0.0191797	1	80.6817	266.8	158.709	174.473	190.483	326.842
C65410_c0_seq1_	PREDICTED: hypothetical protein LOC100709586 [Oreochromis niloticus]	118.152	-1.71298	0.731491	-2.34176	0.0191931	1	208.074	99.1821	100.36	196.169	71.9797	33.1445
C287999_c0_seq1_	hypothetical protein Psta 4537 [Pirellula staleyi DSM 6068] gb	217.67	1.60463	0.685555	2.34063	0.0192513	1	64.7577	270.767	205.389	159.105	297.574	308.428
C99236_c0_seq1_	CI142 protein [Salmo salar] gb	56.5151	-1.63396	0.698271	-2.34	0.0192835	1	100.852	47.6074	53.6811	58.7602	57.9348	20.255
C113255_c0_seq1_	PREDICTED: talin-2-like [Oreochromis niloticus]	176.476	1.67668	0.716804	2.33911	0.0193298	1	58.3881	226.135	81.6886	180.801	189.605	322.239
C1422_c0_seq1_	PREDICTED: dedicator of cytokinesis protein 7 [Oreochromis niloticus]	27.0918	1.77139	0.757527	2.33838	0.0193673	1	7.43121	4.9591	9.33585	17.1761	13.167	110.482
C27281_c0_seq1_	PREDICTED: F-box only protein 7-like [Oreochromis niloticus]	215.041	1.68462	0.720456	2.33827	0.0193732	1	75.3737	141.83	337.257	179.897	136.059	419.831
C10108_c0_seq1_	PREDICTED: transmembrane protein 214-B-like [Oreochromis niloticus]	140.979	1.81473	0.776361	2.33749	0.0194138	1	5.30801	231.094	142.372	57.8562	179.071	230.17
C6178_c0_seq1_	PREDICTED: perilipin-2-like [Oreochromis niloticus]	39.4263	-1.73066	0.740734	-2.33642	0.0194695	1	75.3737	37.6892	28.0075	36.1601	48.279	11.0482
C50964_c1_seq1_	PREDICTED: hypothetical protein LOC100333062 [Danio rerio]	857.946	-1.38553	0.593341	-2.33513	0.0195368	1	1368.4	907.516	678.016	957.34	811.966	424.434
C412_c0_seq1_	PREDICTED: myosin-6-like [Danio rerio]	617.652	1.45704	0.624071	2.33473	0.0195573	1	234.614	579.223	596.327	619.242	830.4	846.106
C103289_c0_seq1_	Sorting nexin-16 [Dicentrarchus labrax]	83.8046	1.79126	0.767437	2.33409	0.0195913	1	6.36961	95.2148	130.702	76.8403	86.9023	106.799
C8668_c1_seq1_	tyrosine-protein kinase HCK [Salmo salar] gb	88.6908	1.7977	0.770388	2.3335	0.0196219	1	16.9856	35.7056	166.878	23.5041	19.3116	269.76
C437_c0_seq1_	PREDICTED: sphingomyelin phosphodiesterase 3-like [Oreochromis niloticus]	589.515	-1.65975	0.711387	-2.33313	0.0196416	1	894.93	804.367	284.743	652.69	736.475	163.881
C30938_c1_seq1_	PREDICTED: baculoviral IAP repeat-containing protein 6 [Oreochromis niloticus]	143.994	-1.55712	0.667618	-2.33235	0.0196825	1	210.197	156.708	109.696	172.665	165.904	48.7961
C46564_c0_seq1_	PREDICTED: hypothetical protein LOC100709243 [Oreochromis niloticus]	67.968	-1.80543	0.774181	-2.33205	0.0196982	1	113.591	69.4275	25.6736	105.768	86.9023	6.44477
C5718_c1_seq1_	Aldehyde dehydrogenase, mitochondrial precursor [Salmo salar]	63.8054	-1.79303	0.768894	-2.33195	0.0197031	1	115.715	60.5011	23.3396	98.5364	74.6131	10.1275
C58197_c0_seq1_	PREDICTED: uncharacterized protein C16orf52 homolog [Macaca mulatta]	25.1447	-1.80633	0.774898	-2.33106	0.0197501	1	64.7577	13.8855	17.5047	31.6401	17.556	5.52409
C68791_c0_seq1_	Hypothetical protein ywlC [Osmerus mordax]	485.553	1.50869	0.647267	2.33086	0.0197609	1	211.259	458.221	662.845	383.297	379.21	818.486
C498759_c0_seq1_	Homeodomain transcription factor Nanog [Dicentrarchus labrax]	109.234	1.78557	0.766344	2.32999	0.0198066	1	31.8481	72.4029	119.032	30.7361	132.548	268.839
C25762_c3_seq1_	melanoma differentiation associated gene 5 [Oncorhynchus mykiss] emb	241.628	1.63346	0.701071	2.32995	0.0198086	1	96.6058	142.822	329.089	176.281	231.739	473.23
C240056_c1_seq1_	RecName: Full=Cytoplasmic polyadenylation element-binding protein 1; Short=CPE-BP1; Short=CPE-binding protein 1; Short=CPEB-1; AltName: Full=Orb/CPEB-related RNA-binding protein; AltName: Full=Protein Zorba; AltName: Full=ZOR-1; AltName: Full=Zebrafish orb-type a dbj	520.038	1.55356	0.667025	2.32909	0.0198543	1	179.411	427.475	556.65	408.61	782.998	765.086
C4603_c0_seq1_	Tumor-associated calcium signal transducer 2 precursor [Salmo salar] gb	5250.14	-1.76973	0.760212	-2.32795	0.0199149	1	7280.47	7032.01	1781.98	8019.41	6665.14	721.814
C3234_c2_seq1_	ferric-chelate reductase 1 precursor [Salmo salar] gb	44.1512	-1.71908	0.738675	-2.32725	0.0199518	1	66.8809	48.5992	42.0113	56.9522	41.2566	9.20682
C388_c0_seq1_	Nucleolar protein 5A [Salmo salar]	194.472	-1.80565	0.776305	-2.32596	0.0200206	1	428.887	109.1	47.8462	432.114	118.503	30.3825
C39934_c2_seq1_	unnamed protein product [Tetraodon nigroviridis]	182.841	-1.62063	0.696877	-2.32556	0.0200418	1	309.988	179.52	109.696	265.777	168.538	63.527
C248257_c0_seq1_	PREDICTED: adenylate cyclase type 8-like [Oreochromis niloticus]	257.33	1.73738	0.747373	2.32465	0.0200909	1	79.6201	238.037	394.439	91.3043	200.139	540.44
C7801_c1_seq1_	PREDICTED: hypothetical protein LOC100696713 [Oreochromis niloticus]	132.994	-1.67185	0.719235	-2.32449	0.0200994	1	211.259	158.691	70.0188	178.089	143.082	36.8273
C8910_c1_seq1_	uncharacterized protein LOC561694 [Danio rerio] gb	74.4498	1.80327	0.776118	2.32345	0.0201552	1	19.1088	35.7056	115.531	20.7921	45.6456	209.915
C7527_c0_seq1_	PREDICTED: MICAL-like protein 2-like [Oreochromis niloticus]	188.564	1.58625	0.682832	2.32304	0.0201769	1	65.8193	180.511	283.576	160.009	141.326	300.142
C7241_c2_seq1_	PREDICTED: nucleoporin NUP188 homolog [Oreochromis niloticus]	302.274	-1.62433	0.699801	-2.32113	0.0202799	1	481.967	247.955	205.389	499.01	282.652	96.6716
C60326_c2_seq1_	PREDICTED: protein unc-13 homolog B-like [Oreochromis niloticus]	10.3088	1.69426	0.730414	2.31959	0.0203629	1	1.0616	4.9591	8.16886	4.52002	2.6334	40.51
C55705_c2_seq1_	PREDICTED: ubiquitin-conjugating enzyme E2 S-like [Oreochromis niloticus]	105.948	-1.67947	0.72432	-2.31869	0.020412	1	212.32	118.027	54.8481	131.985	80.7577	37.7479
C183947_c0_seq1_	PREDICTED: histone-lysine N-methyltransferase, H3 lysine-36 and H4 lysine-20 specific [Oreochromis niloticus]	108.731	1.72421	0.744345	2.31641	0.020536	1	23.3552	184.479	61.85	87.6883	123.77	171.247
C30716_c0_seq1_	PREDICTED: cytoplasmic polyadenylation element-binding protein 1-like [Oreochromis niloticus]	103.451	1.61987	0.699333	2.31631	0.0205414	1	42.4641	64.4684	115.531	85.8803	107.969	204.391
C24561_c1_seq1_	PREDICTED: phosphatidylinositol-binding clathrin assembly protein-like [Oreochromis niloticus]	866.553	1.55798	0.672932	2.31522	0.0206011	1	391.731	1077.12	666.346	511.666	897.99	1654.46
C10371_c3_seq1_	Tbce protein [Danio rerio]	64.9633	-1.74095	0.753398	-2.3108	0.0208439	1	96.6058	89.2639	42.0113	56.0482	94.8025	11.0482
C589_c1_seq1_	Triosephosphate isomerase [Salmo salar] gb	178.579	-1.75053	0.757815	-2.30998	0.0208894	1	303.618	237.045	57.1821	262.161	175.56	35.9066
C54615_c0_seq1_	PREDICTED: membrane-bound O-acyltransferase domain-containing protein 2-like [Oreochromis niloticus]	70.3321	1.5988	0.692584	2.30846	0.0209737	1	28.6633	75.3784	59.516	70.5123	54.4236	133.499
C2303_c3_seq1_	PREDICTED: bifunctional protein NCOAT-like [Oreochromis niloticus]	509.544	1.46583	0.635059	2.30818	0.020989	1	234.614	515.747	590.492	330.865	529.314	856.234
C351280_c0_seq1_	melanocortin 5 receptor [Oncorhynchus mykiss]	12.8991	1.70896	0.740606	2.30752	0.0210257	1	2.1232	4.9591	11.6698	3.61601	4.389	50.6375
C11545_c0_seq1_	kinesin-associated protein 3 [Danio rerio] gb	21.3886	-1.71298	0.742519	-2.30698	0.0210559	1	69.0041	29.7546	15.1707	10.848	2.6334	0.920682
C380850_c0_seq1_	PREDICTED: probable palmitoyltransferase ZDHHC23-like [Oreochromis niloticus]	26.2619	1.77739	0.770714	2.30616	0.0211016	1	3.18481	29.7546	35.0094	19.8881	23.7006	46.0341
C266_c0_seq1_	ribosomal protein L6 [Oncorhynchus masou formosanus]	98.2671	-1.76821	0.767079	-2.30512	0.0211598	1	161.363	121.002	35.0094	161.817	95.6803	14.7309
C9738_c2_seq1_	Serine/threonine-protein phosphatase 2B catalytic subunit gamma isoform [Salmo salar] gb	170.901	-1.75295	0.760807	-2.30407	0.021219	1	287.694	118.027	70.0188	317.305	200.139	32.2239
C91680_c0_seq1_	PREDICTED: sentrin-specific protease 7 [Danio rerio] emb	180.194	1.76792	0.768427	2.30071	0.0214083	1	11.6776	212.25	284.743	215.153	148.348	208.995
C121463_c0_seq1_	PREDICTED: leucine-rich repeat-containing protein 45 [Danio rerio]	85.5553	1.78434	0.776036	2.2993	0.0214877	1	5.30801	127.945	91.0245	30.7361	121.137	137.182
C1470_c3_seq1_	unnamed protein product [Tetraodon nigroviridis]	275.049	1.40401	0.61078	2.29872	0.0215206	1	114.653	289.612	247.4	276.625	335.32	386.686
C5807_c6_seq1_	noggin-1 [Salmo salar] gb	6.60375	1.46819	0.639343	2.29641	0.0216525	1	0	0.991821	4.66792	0.904003	1.7556	31.3032
C4662_c8_seq1_	PREDICTED: single-minded homolog 1-like [Oreochromis niloticus]	107.371	1.62605	0.708326	2.29563	0.0216973	1	32.9097	123.978	106.195	64.1842	145.715	171.247
C67481_c0_seq1_	PREDICTED: myosin-Va [Oreochromis niloticus]	127.757	1.71888	0.749257	2.29411	0.0217844	1	40.3409	217.209	73.5198	81.3603	82.5133	271.601
C249462_c0_seq1_	PREDICTED: coiled-coil domain-containing protein 122-like [Oreochromis niloticus]	22.231	-1.76718	0.770399	-2.29385	0.0217993	1	72.1889	18.8446	4.66792	20.7921	12.2892	4.60341
C16494_c3_seq1_	PREDICTED: E3 ubiquitin-protein ligase UBR5 isoform 1 [Oreochromis niloticus]	143.186	-1.60529	0.699834	-2.29382	0.0218007	1	283.448	116.043	80.5217	172.665	146.593	59.8443
C162874_c0_seq1_	PREDICTED: hypothetical protein LOC100696925 [Oreochromis niloticus]	367.25	1.6435	0.71728	2.29129	0.0219467	1	115.715	424.499	501.802	154.585	383.599	623.301
C17594_c0_seq1_	PREDICTED: sorting and assembly machinery component 50 homolog A-like [Oreochromis niloticus]	248.026	1.56351	0.682466	2.29098	0.0219646	1	100.852	253.906	173.88	170.857	346.731	441.927
C108937_c0_seq1_	unnamed protein product [Tetraodon nigroviridis]	21.9582	-1.77798	0.776165	-2.29072	0.0219795	1	58.3881	11.9019	10.5028	24.4081	21.945	4.60341
C127699_c0_seq1_	PREDICTED: zinc finger Ran-binding domain-containing protein 3-like [Oreochromis niloticus]	24.9956	-1.77693	0.776085	-2.28961	0.0220439	1	71.1273	16.861	8.16886	30.7361	17.556	5.52409
C34133_c0_seq1_	C-factor [Salmo salar]	10.2586	-1.57499	0.68859	-2.28726	0.0221804	1	44.5873	4.9591	1.16698	9.04003	0.877801	0.920682
C31275_c3_seq1_	endoplasmic reticulum lectin 1 precursor [Danio rerio] ref	77.4513	-1.70002	0.743311	-2.28709	0.0221907	1	163.487	39.6728	89.8575	97.6324	48.279	25.7791
C341709_c0_seq1_	PREDICTED: protein dpy-19 homolog 1-like [Oreochromis niloticus]	30.9051	1.75944	0.769582	2.28623	0.0222406	1	7.43121	12.8937	32.6755	33.4481	28.0896	70.8925
C160542_c0_seq1_	centrosomal protein of 290 kDa [Danio rerio]	110.204	1.47059	0.643369	2.28577	0.0222678	1	47.7721	112.076	120.199	113.904	88.6579	178.612
C55296_c0_seq1_	interferon regulatory factor 2-binding protein 1 [Danio rerio] gb	19.802	1.76891	0.774074	2.2852	0.022301	1	1.0616	24.7955	18.6717	9.94404	21.0672	43.272
C1345_c0_seq1_	rhamnose binding lectin STL3 precursor [Oncorhynchus mykiss] dbj	223.182	-1.75233	0.767164	-2.28417	0.0223616	1	395.978	334.244	51.3471	272.105	244.906	40.51
C23890_c4_seq1_	unnamed protein product [Tetraodon nigroviridis]	834.578	-1.57554	0.689903	-2.28371	0.0223885	1	1224.03	1042.4	438.785	960.956	1077.06	264.236
C214843_c0_seq1_	PREDICTED: tubulin monoglycylase TTLL3-like [Oreochromis niloticus]	56.6761	-1.75685	0.769759	-2.28234	0.0224691	1	96.6058	38.681	32.6755	109.384	54.4236	8.28613
C19113_c1_seq1_	villin-1 [Danio rerio] gb	403.383	1.6536	0.724827	2.28138	0.0225261	1	97.6674	489.959	598.661	189.841	468.746	575.426
C338_c156_seq1_	Lipase member H precursor [Salmo salar] gb	856.699	1.69492	0.742976	2.28126	0.0225332	1	195.335	1163.41	1004.77	287.473	1156.06	1333.15
C22968_c0_seq1_	PREDICTED: RING finger protein 122-like [Oreochromis niloticus]	17.3859	1.73986	0.762695	2.2812	0.0225364	1	2.1232	7.93457	25.6736	9.04003	6.14461	53.3995
C10014_c2_seq1_	PREDICTED: hypothetical protein LOC568650 [Danio rerio]	851.46	-1.28366	0.563129	-2.27951	0.0226368	1	1232.52	918.426	737.532	928.412	863.756	428.117
C53040_c2_seq1_	PREDICTED: tripartite motif-containing protein 3-like [Oreochromis niloticus]	242.967	1.47056	0.645212	2.2792	0.0226553	1	110.407	171.585	306.916	212.441	244.906	411.545
C113400_c0_seq1_	PREDICTED: multidrug resistance-associated protein 1 [Danio rerio]	17.0224	1.76053	0.7726	2.2787	0.0226846	1	3.18481	8.92639	15.1707	16.2721	7.02241	51.5582
C115817_c0_seq1_	PREDICTED: kinesin-like protein KIF13B-like [Oreochromis niloticus]	194.346	1.45359	0.637947	2.27854	0.0226945	1	96.6058	220.184	182.049	169.953	148.348	348.938
C12213_c1_seq1_	PREDICTED: lysosomal alpha-glucosidase-like [Oreochromis niloticus]	814.42	1.4451	0.634303	2.27825	0.0227116	1	411.902	739.898	912.579	520.706	834.789	1466.65
C46730_c0_seq1_	PREDICTED: smith-Magenis syndrome chromosomal region candidate gene 7 protein-like [Oreochromis niloticus]	81.2655	-1.68765	0.741359	-2.27643	0.0228202	1	187.904	77.362	37.3434	93.1124	60.5683	31.3032
C38025_c0_seq1_	transmembrane and ubiquitin-like domain-containing protein 1 [Danio rerio] sp	895.387	-1.45776	0.640473	-2.27606	0.0228424	1	1383.27	963.058	564.819	1145.37	939.247	376.559
C40468_c1_seq1_	PREDICTED: serum response factor-like [Oreochromis niloticus]	213.649	-1.7662	0.776306	-2.27514	0.0228978	1	483.029	200.348	22.1726	357.985	185.216	33.1445
C33917_c2_seq1_	intersectin-2 [Danio rerio]	497.43	1.42636	0.627374	2.27354	0.0229934	1	235.676	658.569	381.603	424.882	462.601	821.248
C13192_c3_seq1_	PREDICTED: r3H domain-containing protein 1 isoform 1 [Monodelphis domestica]	454.94	1.38688	0.610097	2.27322	0.023013	1	217.628	352.096	411.944	461.946	568.815	717.211
C42698_c1_seq1_	uncharacterized protein LOC570025 [Danio rerio] gb	37.2186	-1.76429	0.776236	-2.27288	0.0230335	1	64.7577	32.7301	19.8387	49.7202	54.4236	1.84136
C2394_c13_seq1_	ATP synthase coupling factor 6, mitochondrial precursor [Oncorhynchus mykiss]	30.3917	-1.76005	0.774766	-2.27172	0.0231035	1	93.421	36.6974	8.16886	24.4081	12.2892	7.36545
C96722_c0_seq1_	PREDICTED: GTP-binding protein REM 2-like [Oreochromis niloticus]	206.368	-1.69583	0.746751	-2.27094	0.0231504	1	390.669	201.34	68.8519	320.921	197.505	58.9236
C176066_c0_seq1_	PREDICTED: hypothetical protein LOC100537439 [Danio rerio]	25.2078	1.75239	0.772016	2.26989	0.0232141	1	1.0616	34.7137	19.8387	30.7361	9.65581	55.2409
C12357_c1_seq1_	PREDICTED: pecanex-like protein 3-like [Oreochromis niloticus]	139.91	1.56537	0.689686	2.26969	0.0232265	1	43.5257	198.364	95.6924	152.777	147.471	201.629
C26681_c0_seq1_	von Hippel-Lindau tumor suppressor like [Danio rerio] gb	62.3188	1.70016	0.749221	2.26924	0.0232538	1	14.8624	36.6974	102.694	46.1042	65.8351	107.72
C61913_c0_seq1_	PREDICTED: serine-protein kinase ATM [Oreochromis niloticus]	834.397	1.2951	0.570767	2.26906	0.0232649	1	444.811	906.524	902.076	705.123	748.764	1299.08
C37015_c0_seq1_	Activin receptor type-1 precursor [Salmo salar]	1004.32	-1.57498	0.694209	-2.26873	0.0232845	1	1764.38	866.851	556.65	1594.66	857.611	385.766
C98733_c0_seq1_	PREDICTED: desmoplakin-like [Oreochromis niloticus]	173.933	1.41624	0.624514	2.26775	0.0233447	1	74.3121	198.364	138.871	192.553	181.705	257.791
C80775_c0_seq1_	PREDICTED: GPI mannosyltransferase 3-like [Oreochromis niloticus]	66.4948	1.75796	0.775636	2.26648	0.0234221	1	1.0616	59.5093	84.0226	88.5923	55.3014	110.482
C101437_c0_seq1_	PREDICTED: rho GTPase-activating protein 11A-like [Oreochromis niloticus]	307.251	-1.38795	0.612454	-2.26621	0.0234386	1	455.427	365.982	242.732	350.753	291.43	137.182
C64298_c0_seq1_	PREDICTED: LOW QUALITY PROTEIN: ral GTPase-activating protein subunit beta [Danio rerio]	245.74	1.68222	0.742817	2.26465	0.023534	1	74.3121	305.481	151.707	101.248	373.065	468.627
C11986_c0_seq1_	Metallothionein [Salmo salar] gb	16.4963	-1.74964	0.772758	-2.26415	0.023565	1	42.4641	14.8773	7.00188	10.848	21.945	1.84136
C60708_c0_seq1_	Cytosolic 5-nucleotidase 1A [Salmo salar] gb	125.463	1.65923	0.73292	2.26386	0.0235827	1	46.7105	100.174	161.043	53.3362	127.281	264.236
C140_c8_seq1_	Ferritin, heavy subunit [Oncorhynchus mykiss] gb	1361.75	-1.74405	0.770541	-2.26341	0.0236107	1	2803.69	978.927	285.91	2694.83	1105.15	301.984
C48878_c1_seq1_	PREDICTED: PH and SEC7 domain-containing protein 3, partial [Danio rerio]	928.252	-1.30789	0.578043	-2.26261	0.0236597	1	1434.22	966.033	854.23	1081.19	751.397	482.437
C44577_c0_seq1_	PREDICTED: tRNA-dihydrouridine synthase 2-like [Oreochromis niloticus]	101.506	-1.71265	0.757186	-2.26186	0.0237061	1	282.386	54.5501	91.0245	90.4003	47.4012	43.272
C41541_c0_seq1_	PREDICTED: G patch domain-containing protein 4-like [Oreochromis niloticus]	2603.79	1.67801	0.741932	2.26168	0.023717	1	668.809	2578.73	4506.88	890.443	2657.1	4320.76
C15788_c0_seq1_	calcium/calmodulin-dependent protein kinase (CaM kinase) II gamma 1 [Danio rerio] gb	47.209	-1.74343	0.770869	-2.26164	0.0237196	1	69.0041	63.4765	28.0075	48.8162	69.3463	4.60341
C13976_c0_seq1_	PREDICTED: hypothetical protein LOC100697905 [Oreochromis niloticus]	5984.79	1.34464	0.594704	2.26103	0.0237577	1	3035.12	5978.7	4943.33	7614.42	4875.31	9461.84
C51264_c0_seq1_	kinesin light chain 4 [Salmo salar] gb	79.0154	1.55844	0.689492	2.26028	0.0238042	1	22.2936	76.3702	85.1896	93.1124	92.1691	104.958
C22717_c0_seq1_	developmentally-regulated GTP-binding protein 1 [Salmo salar] gb	74.5299	-1.70335	0.753857	-2.25951	0.0238515	1	135.885	60.5011	30.3415	95.8244	106.214	18.4136
C207807_c0_seq1_	PREDICTED: parvalbumin beta-like [Oreochromis niloticus]	10.7309	-1.50302	0.665294	-2.25918	0.0238719	1	47.7721	0.991821	1.16698	12.656	0.877801	0.920682
C44196_c0_seq1_	AFG3-like protein 2 [Danio rerio] gb	62.1373	-1.75367	0.776346	-2.25887	0.0238913	1	94.4826	82.3211	66.5179	43.3922	84.2689	1.84136
C78368_c0_seq1_	PREDICTED: apolipoprotein D-like [Oreochromis niloticus]	50.6743	1.63671	0.724795	2.25818	0.0239347	1	20.1704	56.5338	38.5104	42.4882	38.6232	107.72
C23252_c0_seq1_	Serine/threonine-protein phosphatase 2B catalytic subunit gamma isoform [Salmo salar] gb	216.408	-1.75313	0.776376	-2.25809	0.0239399	1	316.357	305.481	81.6886	311.881	274.752	8.28613
C13196_c2_seq1_	26S proteasome non-ATPase regulatory subunit 2 [Salmo salar] gb	264.126	-1.56281	0.69229	-2.25745	0.0239797	1	438.442	210.266	168.045	417.65	253.684	96.6716
C44816_c0_seq1_	PDZ domain-containing protein GIPC2 [Danio rerio] gb	30.4086	1.73833	0.770617	2.25577	0.0240851	1	8.49282	18.8446	32.6755	14.4641	32.4786	75.4959
C123986_c0_seq1_	PREDICTED: Ig-like V-type domain-containing protein FAM187A-like [Cavia porcellus]	50.3819	-1.67448	0.742732	-2.25449	0.0241654	1	94.4826	56.5338	32.6755	70.5123	33.3564	14.7309
C113521_c0_seq1_	PREDICTED: protein timeless homolog [Danio rerio]	211.386	-1.72422	0.764903	-2.25417	0.0241852	1	287.694	204.315	89.8575	260.353	399.399	26.6998
C25468_c0_seq1_	PREDICTED: LOW QUALITY PROTEIN: SH3 domain-binding protein 2-like [Nomascus leucogenys]	24.8567	-1.74214	0.773311	-2.25283	0.0242701	1	47.7721	32.7301	14.0038	31.6401	19.3116	3.68273
C803_c1_seq1_	unnamed protein product [Tetraodon nigroviridis]	180.557	1.52525	0.677095	2.25264	0.0242822	1	62.6345	187.454	255.569	119.328	191.361	266.998
C6228_c0_seq1_	NADH dehydrogenase iron-sulfur protein 7, mitochondrial precursor [Salmo salar] gb	27.43	-1.74781	0.776039	-2.25222	0.0243081	1	52.0185	26.7792	11.6698	38.8721	32.4786	2.76204
C145284_c0_seq1_	PREDICTED: probable palmitoyltransferase ZDHHC21-like [Oreochromis niloticus]	43.7518	-1.73068	0.768603	-2.25172	0.0243402	1	93.421	67.4438	17.5047	24.4081	58.8126	0.920682
C33941_c0_seq1_	PREDICTED: dynein heavy chain 5, axonemal [Danio rerio]	5.94722	-1.49455	0.664054	-2.25064	0.0244083	1	28.6633	1.98364	2.33396	0.904003	0.877801	0.920682
C41629_c1_seq1_	Ectonucleoside triphosphate diphosphohydrolase 6 [Salmo salar] gb	44.4233	1.67605	0.744715	2.25059	0.0244116	1	15.924	39.6728	23.3396	45.2002	43.89	98.5129
C36939_c0_seq1_	Glucocorticoid-induced transcript 1 protein [Salmo salar] gb	10.3921	1.70663	0.758429	2.25022	0.0244352	1	1.0616	6.94275	7.00188	5.42402	8.77801	33.1445
C13169_c0_seq1_	human immunodeficiency virus type I enhancer binding protein 2 [Danio rerio] emb	54.6165	1.74383	0.775263	2.24934	0.0244908	1	12.7392	52.5665	82.8556	13.5601	32.4786	133.499
C291429_c0_seq1_	PREDICTED: heat shock factor 2-binding protein [Danio rerio]	162.885	-1.54368	0.686348	-2.24912	0.0245047	1	295.125	149.765	107.362	230.521	126.403	68.1304
C25686_c0_seq1_	alpha-2,3-sialyltransferase [Danio rerio]	51.1608	1.74343	0.775433	2.24833	0.0245554	1	6.36961	10.91	96.8594	48.8162	29.8452	114.165
C9849_c0_seq1_	PREDICTED: epidermal retinol dehydrogenase 2-like [Oreochromis niloticus]	1079.58	1.39923	0.622597	2.2474	0.0246145	1	556.279	902.557	991.934	783.771	1369.37	1873.59
C541_c1_seq1_	fibronectin 1b precursor [Danio rerio] gb	77.4988	-1.73966	0.774363	-2.24657	0.0246672	1	237.799	30.7464	29.1745	92.2084	46.5234	28.5411
C185170_c0_seq1_	tubulin tyrosine ligase-like family member 6a [Salmo salar]	16.7758	-1.7419	0.77602	-2.24466	0.02479	1	35.0329	21.8201	11.6698	15.3681	14.9226	1.84136
C40131_c0_seq1_	PREDICTED: pericentrin [Danio rerio]	1384.88	-1.40728	0.62698	-2.24453	0.0247982	1	1876.91	1674.19	987.266	1547.65	1680.99	542.281
C5971_c0_seq1_	Receptor expression-enhancing protein 5 [Oncorhynchus mykiss]	91.3959	-1.53392	0.683594	-2.24391	0.0248384	1	158.179	61.4929	114.364	97.6324	79.8799	36.8273
C302_c3_seq1_	60S ribosomal protein L31 [Salmo salar] gb	95.6449	-1.73654	0.774749	-2.24143	0.0249985	1	181.534	76.3702	22.1726	178.993	100.069	14.7309
C21621_c5_seq1_	PREDICTED: dmX-like protein 2-like, partial [Danio rerio]	259.037	1.66213	0.741762	2.24079	0.0250399	1	61.5729	448.303	109.696	226.001	307.23	401.417
C33297_c0_seq1_	tyrosine phosphatase type IVA 1 [Salmo salar] gb	11.9488	-1.72467	0.769857	-2.24024	0.0250752	1	30.7865	11.9019	9.33585	10.848	7.90021	0.920682
C98837_c0_seq1_	PREDICTED: progestin and adipoQ receptor family member 3-like [Oreochromis niloticus]	176.961	1.45515	0.649593	2.2401	0.0250846	1	91.2978	143.814	157.542	135.601	198.383	335.128
C11948_c0_seq1_	PREDICTED: syndecan-4-like [Oreochromis niloticus]	1578.47	1.70731	0.762271	2.23977	0.0251061	1	114.653	1842.8	2482.17	1674.21	1824.07	1532.93
C52124_c0_seq1_	PREDICTED: inhibitor of nuclear factor kappa-B kinase subunit alpha-like [Oreochromis niloticus]	54.8822	-1.55066	0.6925	-2.23921	0.025142	1	88.113	50.5829	49.0132	68.7043	53.5458	19.3343
C28734_c0_seq1_	PREDICTED: hypothetical protein LOC100700132 [Oreochromis niloticus]	35.2019	1.72308	0.769676	2.2387	0.0251752	1	3.18481	52.5665	7.00188	47.9122	14.9226	85.6234
C20166_c0_seq1_	PREDICTED: platelet-activating factor acetylhydrolase-like [Oreochromis niloticus]	38.5934	-1.71842	0.767936	-2.23771	0.0252397	1	52.0185	47.6074	33.8424	47.0082	47.4012	3.68273
C43333_c1_seq1_	pygopus homolog 2 [Danio rerio] emb	158.844	-1.44693	0.646781	-2.23712	0.0252783	1	303.618	156.708	149.374	142.833	116.747	83.782
C56220_c0_seq1_	PREDICTED: TATA box-binding protein-associated factor RNA polymerase I subunit A-like [Oreochromis niloticus]	14.5034	1.5627	0.698614	2.23686	0.0252956	1	1.0616	0.991821	1.16698	11.752	14.0448	58.0029
C23778_c0_seq1_	PREDICTED: ras-associated and pleckstrin homology domains-containing protein 1-like [Oreochromis niloticus]	264.191	-1.268	0.567118	-2.23587	0.0253606	1	401.286	247.955	274.24	251.313	269.485	140.864
C306028_c0_seq1_	PREDICTED: coiled-coil domain-containing protein 105-like [Danio rerio]	69.807	-1.7314	0.774622	-2.23515	0.0254074	1	159.24	41.6565	24.5066	137.409	40.3788	15.6516
C60835_c1_seq1_	G protein-coupled receptor 56 precursor [Danio rerio] dbj	167.476	1.61615	0.723999	2.23226	0.0255978	1	72.1889	159.683	179.715	68.7043	155.371	369.193
C85948_c0_seq1_	PREDICTED: hypothetical protein LOC566825 [Danio rerio]	90.0507	1.7051	0.764006	2.23179	0.0256288	1	8.49282	167.618	11.6698	108.48	17.556	226.488
C21944_c0_seq1_	WD repeat-containing protein 61 [Salmo salar]	33.4723	-1.66141	0.744431	-2.23178	0.0256294	1	56.2649	46.6156	32.6755	28.0241	28.9674	8.28613
C52562_c0_seq1_	PREDICTED: SH3 domain and tetratricopeptide repeats-containing protein 1-like [Meleagris gallopavo]	78.0674	-1.53387	0.687561	-2.23089	0.0256887	1	135.885	68.4356	56.0151	102.152	74.6131	31.3032
C10851_c1_seq1_	C18orf37 [Osmerus mordax]	181.212	-1.63726	0.733941	-2.23078	0.0256958	1	352.452	161.667	87.5235	300.129	122.892	62.6063
C3793_c1_seq1_	PREDICTED: microfibrillar-associated protein 1-like [Oreochromis niloticus]	721.015	-1.33077	0.596585	-2.23064	0.0257049	1	1169.89	614.929	558.984	730.435	872.534	379.321
C42257_c0_seq1_	oocyte protease inhibitor-1 precursor [Oncorhynchus mykiss] gb	162.385	-1.47645	0.662168	-2.22972	0.0257663	1	309.988	153.732	107.362	183.513	138.693	81.02
C32903_c0_seq1_	PREDICTED: hypothetical protein LOC100710899 [Oreochromis niloticus]	262.734	-1.71426	0.768953	-2.22935	0.0257908	1	641.208	134.888	80.5217	473.698	164.149	81.9407
C71622_c0_seq1_	PREDICTED: transcription elongation factor B polypeptide 3-like [Danio rerio]	433.475	1.61671	0.725238	2.22922	0.0257996	1	70.0657	433.426	523.974	519.802	615.338	438.244
C40061_c0_seq1_	PREDICTED: glycosyltransferase 8 domain-containing protein 1-like [Oreochromis niloticus]	567.891	1.58031	0.708954	2.22907	0.025809	1	210.197	689.315	623.168	222.385	650.45	1011.83
C16920_c1_seq1_	PREDICTED: transmembrane protein 131 [Danio rerio]	53.2262	-1.72125	0.772938	-2.2269	0.0259543	1	71.1273	86.2884	39.6773	63.2802	55.3014	3.68273
C26637_c4_seq1_	PREDICTED: dyslexia-associated protein KIAA0319-like protein-like [Oreochromis niloticus]	5.05662	-1.43403	0.644185	-2.22611	0.0260065	1	25.4784	0.991821	1.16698	0.904003	0.877801	0.920682
C12116_c0_seq1_	26S proteasome non-ATPase regulatory subunit 12 [Salmo salar] gb	65.3615	-1.62703	0.730889	-2.2261	0.0260072	1	123.146	60.5011	53.6811	37.0641	95.6803	22.0964
C60792_c0_seq1_	PREDICTED: E3 SUMO-protein ligase RanBP2 [Oreochromis niloticus]	168.001	1.57969	0.709781	2.2256	0.0260412	1	47.7721	248.947	93.3585	186.225	190.483	241.219
C30757_c1_seq1_	Tetratricopeptide repeat protein 32 [Salmo salar] gb	38.9476	-1.72582	0.775695	-2.22487	0.0260903	1	71.1273	36.6974	19.8387	76.8403	24.5784	4.60341
C52313_c1_seq1_	PREDICTED: hypothetical protein LOC100149667 [Danio rerio]	239.801	-1.55053	0.697096	-2.22427	0.0261301	1	556.279	152.74	218.225	211.537	172.049	127.975
C101106_c1_seq1_	PREDICTED: RING finger protein 31 [Danio rerio]	178.234	1.47591	0.663628	2.22401	0.026148	1	70.0657	173.569	263.738	142.833	144.837	274.363
C21092_c1_seq1_	PREDICTED: hypothetical protein LOC100707962 [Oreochromis niloticus]	100.165	-1.49186	0.670867	-2.22377	0.0261636	1	149.686	96.2066	78.1877	136.505	103.58	36.8273
C98253_c0_seq1_	RecName: Full=Zinc finger protein 394 gb	201.067	1.40287	0.630967	2.22337	0.026191	1	100.852	192.413	234.563	142.833	190.483	345.256
C192368_c1_seq1_	PREDICTED: GREB1-like protein [Danio rerio]	34.6342	1.71211	0.770666	2.22159	0.0263109	1	5.30801	51.5747	39.6773	15.3681	35.112	60.765
C29195_c1_seq1_	PREDICTED: sodium/potassium/calcium exchanger 3-like [Oreochromis niloticus]	19.5779	-1.72126	0.775079	-2.22075	0.0263677	1	42.4641	14.8773	11.6698	33.4481	13.167	1.84136
C135294_c0_seq1_	unnamed protein product [Tetraodon nigroviridis]	229.397	1.59894	0.720126	2.22036	0.0263943	1	71.1273	278.702	246.233	95.8244	311.619	372.876
C7433_c0_seq1_	Nitric oxide synthase-interacting protein [Esox lucius]	51.7982	1.62071	0.730024	2.22008	0.0264133	1	10.616	58.5174	64.1839	48.8162	61.4461	67.2098
C13500_c0_seq1_	Small nuclear ribonucleoprotein F [Salmo salar] gb	297.389	-1.67954	0.757038	-2.21856	0.0265164	1	544.602	292.587	75.8537	471.89	323.908	75.4959
C24668_c0_seq1_	tumor necrosis factor receptor type 1-associated DEATH domain protein [Oncorhynchus mykiss] sp	18.1081	-1.72097	0.775865	-2.21813	0.0265459	1	38.2177	8.92639	15.1707	20.7921	23.7006	1.84136
C54542_c0_seq1_	PREDICTED: fibronectin-like isoform 2 [Oreochromis niloticus]	36.4902	1.6886	0.761751	2.21673	0.0266416	1	11.6776	44.6319	17.5047	25.3121	35.112	84.7027
C85893_c0_seq1_	PREDICTED: BTB/POZ domain-containing adapter for CUL3-mediated RhoA degradation protein 3-like, partial [Oreochromis niloticus]	48.0973	1.69961	0.767224	2.21528	0.0267409	1	8.49282	60.5011	50.1802	18.0801	68.4685	82.8613
C40167_c1_seq1_	unnamed protein product [Tetraodon nigroviridis]	30.8293	-1.70615	0.770314	-2.21487	0.0267689	1	76.4353	37.6892	18.6717	28.9281	14.0448	9.20682
C37809_c0_seq1_	metallophosphoesterase 1 [Ictalurus punctatus] gb	63.0416	1.70182	0.768398	2.21477	0.0267759	1	6.36961	18.8446	144.706	12.656	46.5234	149.15
C67460_c1_seq1_	toll-like receptor 2 [Epinephelus coioides]	20.0282	1.71812	0.775893	2.21438	0.0268028	1	1.0616	22.8119	25.6736	18.0801	17.556	34.9859
C2570_c0_seq1_	retinoic acid or thyroid hormone receptor corepressor [Danio rerio]	336.849	-1.3076	0.590524	-2.2143	0.0268079	1	574.327	276.718	322.087	358.889	297.574	191.502
C118076_c0_seq1_	PREDICTED: axin-1-like [Oreochromis niloticus]	164.6	1.52919	0.690925	2.21324	0.0268808	1	54.1417	153.732	138.871	129.272	270.363	241.219
C77733_c0_seq1_	PREDICTED: hypothetical protein LOC100703326 [Oreochromis niloticus]	620.216	1.63913	0.740613	2.2132	0.0268838	1	200.643	613.937	982.598	195.265	550.381	1178.47
C17045_c0_seq1_	PREDICTED: zinc finger protein 16-like [Oreochromis niloticus]	220.399	-1.36635	0.617414	-2.21301	0.0268966	1	346.082	221.176	175.047	279.337	194.872	105.878
C4764_c0_seq1_	PREDICTED: aspartate aminotransferase, cytoplasmic-like [Oreochromis niloticus]	52.4052	-1.63669	0.739597	-2.21295	0.0269014	1	98.729	76.3702	30.3415	38.8721	53.5458	16.5723
C39_c12_seq1_	unnamed protein product [Tetraodon nigroviridis]	43.084	-1.69667	0.766874	-2.21245	0.0269354	1	72.1889	40.6647	46.6792	71.4163	20.1894	7.36545
C3776_c0_seq1_	PREDICTED: cytochrome P450 2J2-like [Oreochromis niloticus]	25.3632	1.70331	0.769945	2.21225	0.0269493	1	6.36961	25.7873	32.6755	14.4641	15.8004	57.0823
C7926_c0_seq1_	uncoupling protein 2A [Oncorhynchus mykiss] gb	844.881	1.70649	0.771911	2.21073	0.0270543	1	79.6201	322.342	676.849	1066.72	1816.17	1107.58
C114401_c0_seq1_	Suppressor of cytokine signaling 6 [Dicentrarchus labrax]	151.036	1.59142	0.720035	2.2102	0.0270915	1	54.1417	205.307	67.6849	123.848	179.949	275.284
C32925_c0_seq1_	DNA-directed RNA polymerase II subunit RPB11-a [Salmo salar] gb	170.074	-1.4346	0.649327	-2.20937	0.027149	1	281.325	196.381	112.03	198.881	154.493	77.3372
C85504_c0_seq1_	uncharacterized protein LOC559398 [Danio rerio] emb	816.891	1.67082	0.756495	2.20863	0.0272005	1	163.487	908.508	850.729	244.985	1486.12	1247.52
C77477_c0_seq1_	unnamed protein product [Tetraodon nigroviridis]	79.1354	1.4633	0.662683	2.20814	0.0272344	1	33.9713	65.4602	96.8594	71.4163	76.3687	130.737
C42073_c0_seq1_	PREDICTED: centrosome-associated protein 350 [Danio rerio]	263.28	1.42261	0.644549	2.20714	0.0273041	1	115.715	333.252	179.715	224.193	312.497	414.307
C30188_c3_seq1_	PREDICTED: neurobeachin-like protein 1 [Oreochromis niloticus]	5907.87	1.34087	0.608283	2.20435	0.0274998	1	3232.58	7050.85	6029.79	4160.22	4810.35	10163.4
C2080_c7_seq1_	uncharacterized protein LOC561694 [Danio rerio] gb	6.45833	1.25113	0.56768	2.20394	0.0275284	1	1.0616	0	0	0.904003	0.877801	35.9066
C52286_c2_seq1_	PREDICTED: transcription intermediary factor 1-beta [Danio rerio]	54.2655	-1.63553	0.742131	-2.20383	0.0275365	1	83.8665	55.542	33.8424	86.7843	52.668	12.8895
C23120_c0_seq1_	PREDICTED: growth arrest-specific protein 6-like [Oreochromis niloticus]	333.16	1.26957	0.57611	2.2037	0.0275454	1	168.795	296.554	403.775	312.785	330.931	486.12
C12208_c0_seq1_	PREDICTED: poly [ADP-ribose] polymerase 14-like [Oreochromis niloticus]	71.3857	1.58223	0.718337	2.20263	0.0276207	1	19.1088	84.3048	71.1858	48.8162	102.703	102.196
C7293_c0_seq1_	Cytochrome c oxidase copper chaperone [Oncorhynchus mykiss] gb	108.719	-1.64354	0.746424	-2.20189	0.0276731	1	162.425	120.01	45.5122	159.105	141.326	23.9377
C32311_c2_seq1_	PREDICTED: neuropathy target esterase-like [Oreochromis niloticus]	207.587	-1.68763	0.766475	-2.20181	0.0276785	1	446.934	151.749	49.0132	362.505	177.316	58.0029
C48660_c0_seq1_	uncharacterized protein LOC541512 [Danio rerio] ref	62.601	1.70558	0.774738	2.2015	0.0277007	1	12.7392	33.7219	114.364	18.0801	63.2017	133.499
C38650_c0_seq1_	PREDICTED: activating signal cointegrator 1 [Oreochromis niloticus]	274.41	1.41038	0.640728	2.20122	0.0277207	1	105.099	270.767	400.274	231.425	265.096	373.797
C98149_c0_seq1_	PREDICTED: ATPase family AAA domain-containing protein 2B-like [Danio rerio]	455.414	1.30856	0.594473	2.20121	0.0277211	1	260.092	442.352	497.134	355.273	394.133	783.5
C8482_c1_seq1_	PREDICTED: ashwin-like [Oreochromis niloticus]	169.224	-1.58539	0.720523	-2.20033	0.0277833	1	264.339	202.331	78.1877	251.313	168.538	50.6375
C139421_c0_seq1_	Orphan sodium-and chloride-dependent neurotransmitter transporter NTT73 [Dicentrarchus labrax]	21.7143	1.15416	0.524565	2.20023	0.0277904	1	1.0616	1.98364	1.16698	0.904003	0.877801	124.292
C8482_c0_seq1_	PREDICTED: WW domain-binding protein 2-like [Oreochromis niloticus]	138.593	1.51595	0.689222	2.1995	0.0278421	1	62.6345	83.313	182.049	110.288	129.037	264.236
C8291_c1_seq1_	PREDICTED: protein furry homolog [Oreochromis niloticus]	60.4047	-1.46305	0.665423	-2.19868	0.027901	1	102.975	51.5747	61.85	58.7602	60.5683	26.6998
C50782_c3_seq1_	fibroblast growth factor 13 [Salmo salar] gb	78.4029	-1.54814	0.704477	-2.19758	0.0279793	1	114.653	89.2639	50.1802	95.8244	96.5581	23.9377
C40611_c0_seq1_	uncharacterized protein LOC561095 [Danio rerio] gb	29.6202	-1.68666	0.767855	-2.19659	0.0280499	1	80.6817	16.861	24.5066	25.3121	19.3116	11.0482
C51960_c1_seq1_	serine/threonine protein kinase pim-3 [Salmo salar] gb	2727.25	1.32989	0.605466	2.19647	0.0280584	1	1299.4	2952.65	3049.32	1798.06	3205.73	4058.36
C14843_c0_seq1_	Mediator of RNA polymerase II transcription subunit 10 [Salmo salar] gb	250.756	-1.45203	0.661176	-2.19613	0.0280824	1	314.234	315.399	203.055	335.385	255.44	81.02
C82348_c2_seq1_	ferric-chelate reductase 1 precursor [Salmo salar] gb	234.103	1.59241	0.725494	2.19493	0.0281688	1	76.4353	159.683	416.612	127.464	222.084	402.338
C21841_c1_seq1_	unnamed protein product [Tetraodon nigroviridis]	479.637	1.29712	0.591139	2.19427	0.0282163	1	267.524	458.221	417.779	377.873	560.037	796.39
C14874_c2_seq1_	calcium/calmodulin-dependent protein kinase (CaM kinase) II gamma 1 [Danio rerio] gb	28.2949	1.66385	0.75843	2.19381	0.0282489	1	4.24641	11.9019	53.6811	10.848	4.389	84.7027
C21879_c0_seq1_	Twinfilin-1 [Salmo salar]	11.9437	-1.60541	0.732	-2.19319	0.028294	1	41.4025	0.991821	10.5028	9.94404	7.90021	0.920682
C56571_c0_seq1_	Zgc:162613 protein [Danio rerio]	30.5495	1.65505	0.754781	2.19275	0.0283255	1	9.55442	25.7873	30.3415	17.1761	35.9898	64.4477
C23014_c0_seq1_	glucose transporter 1A [Oncorhynchus mykiss] gb	68.9528	-1.69334	0.772368	-2.1924	0.0283504	1	145.439	94.223	7.00188	91.3043	70.2241	5.52409
C62385_c0_seq1_	PREDICTED: zinc finger CCHC domain-containing protein 7 [Danio rerio]	142.766	-1.39946	0.638474	-2.19188	0.0283884	1	191.088	160.675	149.374	122.944	178.194	54.3202
C11061_c1_seq1_	serine-rich adhesin, platelet-type [Lactobacillus oris F0423]	385	1.30543	0.595748	2.19125	0.0284335	1	200.643	424.499	448.121	295.609	335.32	605.808
C80759_c0_seq1_	PREDICTED: RING finger protein 213-like [Oreochromis niloticus]	37.4382	1.68078	0.767133	2.19099	0.0284526	1	7.43121	53.5583	15.1707	46.1042	34.2342	68.1304
C96495_c0_seq1_	PREDICTED: remodeling and spacing factor 1-like [Oreochromis niloticus]	25.5947	1.69291	0.772783	2.19067	0.0284755	1	4.24641	38.681	23.3396	26.2161	12.2892	48.7961
C136809_c0_seq1_	PREDICTED: CAP-Gly domain-containing linker protein 4 [Oreochromis niloticus]	47.1947	-1.69636	0.774775	-2.18949	0.028561	1	78.5585	42.6483	60.683	70.5123	29.8452	0.920682
C23790_c2_seq1_	PREDICTED: protein RIC1 homolog [Oreochromis niloticus]	625.087	1.34304	0.613413	2.18946	0.0285634	1	328.035	787.506	436.451	585.794	571.448	1041.29
C248876_c0_seq1_	PREDICTED: testicular acid phosphatase homolog [Oreochromis niloticus]	19.0676	1.42324	0.650129	2.18917	0.0285845	1	1.0616	24.7955	1.16698	4.52002	0	82.8613
C149279_c0_seq1_	PREDICTED: putative E3 ubiquitin-protein ligase UBR7-like [Oreochromis niloticus]	208.785	1.43681	0.656464	2.18871	0.0286183	1	72.1889	199.356	268.406	167.241	272.996	272.522
C13250_c1_seq1_	PREDICTED: UPF0327 protein C1orf151-like [Oreochromis niloticus]	77.7575	-1.69872	0.776211	-2.18848	0.0286347	1	159.24	50.5829	16.3377	156.393	71.1019	12.8895
C91333_c0_seq1_	PREDICTED: biorientation of chromosomes in cell division protein 1-like [Oreochromis niloticus]	259.286	1.63482	0.747192	2.18795	0.0286729	1	64.7577	280.685	462.124	93.1124	236.128	418.91
C88941_c0_seq1_	PREDICTED: FERM domain-containing protein 6-like [Oreochromis niloticus]	261.803	-1.35538	0.619605	-2.1875	0.0287063	1	440.565	246.963	183.216	311.881	251.929	136.261
C211324_c0_seq1_	Si:ch211-154o6.7 protein [Danio rerio]	43.8156	1.69801	0.776294	2.18733	0.0287185	1	8.49282	18.8446	89.8575	19.8881	25.4562	100.354
C22271_c0_seq1_	PREDICTED: kynurenine 3-monooxygenase-like [Oreochromis niloticus]	17.1226	1.69254	0.773998	2.18675	0.0287608	1	3.18481	12.8937	22.1726	15.3681	12.2892	36.8273
C26980_c1_seq1_	PREDICTED: probable ATP-dependent RNA helicase YTHDC2-like [Loxodonta africana]	163.253	-1.61855	0.740173	-2.18672	0.0287629	1	269.647	178.528	72.3528	287.473	126.403	45.1134
C160229_c0_seq1_	unnamed protein product [Tetraodon nigroviridis]	63.1055	1.68382	0.77018	2.18627	0.0287957	1	10.616	81.3293	50.1802	21.6961	107.092	107.72
C86228_c0_seq1_	1-phosphatidylinositol-4,5-bisphosphate phosphodiesterase epsilon-1 [Dicentrarchus labrax]	116.132	-1.46635	0.670812	-2.18593	0.0288205	1	194.273	93.2312	126.034	152.777	80.7577	49.7168
C86951_c1_seq1_	SH3 binding protein 4 [Seriola quinqueradiata]	158.922	1.50437	0.688355	2.18546	0.0288555	1	49.8953	143.814	170.379	120.232	251.929	217.281
C38077_c0_seq1_	hypothetical protein EGM 08070, partial [Macaca fascicularis]	480.384	1.3925	0.637304	2.18498	0.0288902	1	252.661	531.616	416.612	295.609	524.047	861.758
C62586_c0_seq1_	PREDICTED: LOW QUALITY PROTEIN: ral GTPase-activating protein subunit beta [Danio rerio]	105.793	1.53122	0.700876	2.18471	0.0289098	1	30.7865	87.2802	88.6905	118.424	165.027	144.547
C72342_c0_seq1_	D-aspartate oxidase [Osmerus mordax]	48.9922	-1.54317	0.706782	-2.18337	0.0290086	1	96.6058	53.5583	44.3453	35.2561	43.0122	21.1757
C812_c0_seq1_	autophagy-related protein 9A [Danio rerio] gb	176.032	1.30528	0.597937	2.18297	0.0290378	1	80.6817	179.52	175.047	161.817	213.306	245.822
C14285_c0_seq1_	PREDICTED: peptidyl-prolyl cis-trans isomerase FKBP1A-like [Oreochromis niloticus]	17.313	1.68384	0.77169	2.18202	0.0291078	1	4.24641	8.92639	18.6717	5.42402	12.2892	54.3202
C48380_c0_seq1_	PREDICTED: E3 SUMO-protein ligase RanBP2 [Oreochromis niloticus]	154.129	1.5957	0.731318	2.18196	0.0291127	1	43.5257	260.849	71.1858	144.641	161.515	243.06
C164811_c0_seq1_	MIS12 homolog [Salmo salar] gb	56.9243	-1.68841	0.774949	-2.17874	0.0293511	1	87.0514	40.6647	38.5104	43.3922	126.403	5.52409
C49964_c1_seq1_	Nucleolar protein 11-like [Salmo salar] gb	293.743	-1.49501	0.686395	-2.17806	0.0294013	1	510.631	267.792	178.548	456.522	225.595	123.371
C101252_c0_seq1_	CASP8 associated protein 2 [Danio rerio]	156.698	1.41021	0.647501	2.17793	0.029411	1	78.5585	195.389	133.036	113	143.082	277.125
C139813_c0_seq1_	tumor protein p73 [Danio rerio] emb	27.5195	-1.69056	0.77631	-2.17769	0.0294289	1	84.9282	8.92639	24.5066	23.5041	14.0448	9.20682
C5674_c0_seq1_	PREDICTED: cytoplasmic dynein 1 heavy chain 1-like isoform 1 [Oreochromis niloticus]	652.176	1.34682	0.618501	2.17755	0.0294396	1	259.031	612.945	941.753	633.706	624.116	841.503
C73780_c0_seq1_	RING finger protein 151 [Salmo salar] gb	14.1593	1.60395	0.73668	2.17727	0.0294607	1	1.0616	0.991821	12.8368	9.94404	13.167	46.9548
C161396_c0_seq1_	PREDICTED: UDP-N-acetyl-alpha-D-galactosamine:polypeptide N-acetylgalactosaminyltransferase-like 4b [Danio rerio]	23.0266	1.68824	0.775675	2.17648	0.0295197	1	5.30801	34.7137	15.1707	16.2721	10.5336	56.1616
C2347_c1_seq1_	Cyclin-G1 [Salmo salar]	192.308	-1.38964	0.63851	-2.17638	0.0295272	1	321.665	179.52	129.535	241.369	187.849	93.9095
C85498_c0_seq1_	PREDICTED: major facilitator superfamily domain-containing protein 2A-B-like [Oreochromis niloticus]	9.95692	-1.47143	0.676106	-2.17634	0.0295299	1	47.7721	0.991821	1.16698	0.904003	6.14461	2.76204
C243705_c0_seq1_	Nr6a1a protein [Danio rerio]	315.787	1.6602	0.763443	2.17462	0.0296586	1	43.5257	464.172	198.387	162.721	616.216	409.703
C36240_c0_seq1_	hypothetical protein [Fundulus heteroclitus]	89.5521	-1.35961	0.625371	-2.17408	0.0296991	1	133.762	80.3375	95.6924	92.2084	94.8025	40.51
C20403_c0_seq1_	PREDICTED: poly [ADP-ribose] polymerase 4 [Danio rerio]	18.9654	-1.67335	0.769838	-2.17364	0.0297322	1	41.4025	29.7546	15.1707	7.23203	19.3116	0.920682
C542_c0_seq1_	ribosomal protein L10a-2 [Salmo salar] gb	2492.57	-1.62095	0.74579	-2.17346	0.0297457	1	3902.45	2561.87	5182.56	1517.82	1169.23	621.46
C65328_c0_seq1_	RecName: Full=Serine/threonine-protein kinase N2; AltName: Full=PKN gamma; AltName: Full=Protein kinase C-like 2; AltName: Full=Protein-kinase C-related kinase 2 gb	91.6148	1.65821	0.763066	2.17309	0.0297739	1	18.0472	125.961	67.6849	34.3521	154.493	149.15
C50184_c0_seq1_	PREDICTED: hypothetical protein LOC100691159 [Oreochromis niloticus]	160.788	1.31515	0.605244	2.17293	0.0297854	1	85.9898	184.479	138.871	141.929	149.226	264.236
C126547_c0_seq1_	apolipoprotein L, 1 [Danio rerio] emb	79.2366	-1.58532	0.729624	-2.17278	0.0297965	1	110.407	118.027	49.0132	75.9363	102.703	19.3343
C74221_c0_seq1_	OTU domain-containing protein 7B [Danio rerio] gb	15.6581	-1.6859	0.77606	-2.17238	0.0298267	1	37.1561	14.8773	7.00188	18.9841	13.167	2.76204
C153220_c0_seq1_	teashirt homolog 1 precursor [Danio rerio] sp	212.449	-1.37553	0.633264	-2.17212	0.0298463	1	305.741	182.495	166.878	273.913	255.44	90.2268
C105953_c0_seq1_	Protein tyrosine phosphatase domain-containing protein 1 [Dicentrarchus labrax]	29.0144	-1.68601	0.776232	-2.17204	0.0298528	1	56.2649	27.771	19.8387	54.2402	12.2892	3.68273
C67892_c0_seq1_	Josephin-1 [Dicentrarchus labrax]	227.02	-1.63451	0.752691	-2.17155	0.0298893	1	477.721	153.732	107.362	423.074	122.892	77.3372
C17675_c3_seq1_	PREDICTED: E3 ubiquitin-protein ligase UBR5 isoform 1 [Oreochromis niloticus]	190.206	-1.44626	0.666071	-2.17133	0.0299065	1	285.571	205.307	123.7	273.009	179.071	74.5752
C91174_c0_seq1_	PREDICTED: cyclin-J-like [Oreochromis niloticus]	702.148	-1.47386	0.678897	-2.17097	0.0299337	1	1222.97	673.446	452.788	1084.8	471.379	307.508
C120_c40_seq1_	Hypoxia up-regulated protein 1 precursor [Salmo salar]	1179.18	-1.58714	0.73176	-2.16894	0.0300872	1	2440.62	682.373	537.978	1976.15	964.703	473.23
C106307_c0_seq1_	hypothetical protein KGM 03831 [Danaus plexippus]	219.489	1.3614	0.62788	2.16825	0.0301398	1	109.345	239.029	253.235	145.545	209.794	359.986
C172592_c0_seq1_	PREDICTED: tensin-like C1 domain-containing phosphatase [Oreochromis niloticus]	20.5331	-1.68134	0.775584	-2.16783	0.0301714	1	45.6489	7.93457	11.6698	26.2161	28.9674	2.76204
C136948_c0_seq1_	PREDICTED: cytoplasmic dynein 2 heavy chain 1-like [Oreochromis niloticus]	391.007	1.41212	0.651415	2.16778	0.0301754	1	231.429	330.276	346.593	356.177	268.607	812.962
C848_c1_seq1_	ATP synthase f chain, mitochondrial [Oncorhynchus mykiss]	403.594	-1.66621	0.76879	-2.16732	0.0302108	1	628.468	434.418	85.1896	643.65	563.548	66.2891
C59461_c1_seq1_	Protoporphyrinogen oxidase [Salmo salar] gb	29.8914	-1.62034	0.747819	-2.16675	0.0302536	1	79.6201	31.7383	3.50094	12.656	50.9124	0.920682
C68927_c1_seq1_	PREDICTED: hypothetical protein LOC550304 [Danio rerio]	11.7863	-1.65277	0.762847	-2.16658	0.0302671	1	36.0945	6.94275	3.50094	13.5601	8.77801	1.84136
C11588_c1_seq1_	unnamed protein product [Tetraodon nigroviridis]	1174.84	1.26539	0.584106	2.16636	0.0302836	1	557.341	1147.54	1435.39	916.659	1378.15	1613.95
C127929_c0_seq1_	RecName: Full=Alpha-(1,3)-fucosyltransferase 10; AltName: Full=Fucosyltransferase X; Short=Fuc-TX; Short=FucT-X; AltName: Full=Galactoside 3-L-fucosyltransferase 10; Short=Fucosyltransferase 10	33.4089	1.66203	0.767251	2.16622	0.0302947	1	5.30801	16.861	67.6849	6.32802	14.0448	90.2268
C9495_c4_seq1_	nuclear respiratory factor 1 [Danio rerio]	243.99	1.56539	0.722678	2.1661	0.0303035	1	52.0185	314.407	340.758	147.353	322.153	287.253
C100286_c0_seq1_	PREDICTED: TBC1 domain family member 2B-like [Oreochromis niloticus]	179.951	1.59883	0.738152	2.16599	0.0303117	1	56.2649	152.74	78.1877	150.969	323.908	317.635
C46627_c0_seq1_	PREDICTED: protein HIRA [Danio rerio] emb	57.3805	-1.66155	0.767194	-2.16574	0.0303308	1	141.193	24.7955	8.16886	133.793	28.9674	7.36545
C256979_c0_seq1_	PREDICTED: cytoplasmic dynein 2 heavy chain 1-like [Oreochromis niloticus]	8.20148	1.39393	0.644161	2.16395	0.0304684	1	1.0616	1.98364	1.16698	6.32802	0	38.6686
C49000_c0_seq1_	PREDICTED: LOW QUALITY PROTEIN: nuclear mitotic apparatus protein 1-like [Ailuropoda melanoleuca]	1509.74	1.23679	0.57169	2.16339	0.0305112	1	782.401	1627.58	1792.48	1126.39	1547.56	2182.02
C18653_c0_seq1_	PREDICTED: hypothetical protein LOC100701677 [Oreochromis niloticus]	217.251	-1.36611	0.631559	-2.16307	0.030536	1	317.419	289.612	157.542	209.729	234.373	94.8302
C43752_c1_seq1_	NOP2/Sun domain family, member 5 [Salmo salar] gb	902.097	-1.17237	0.542063	-2.1628	0.0305566	1	1347.17	802.383	997.768	784.675	958.558	522.026
C104998_c0_seq1_	PREDICTED: ubiquitin thioesterase OTU1-like [Oreochromis niloticus]	224.888	1.67856	0.776206	2.16251	0.0305786	1	56.2649	83.313	504.136	68.7043	98.3137	538.599
C291707_c0_seq1_	unnamed protein product [Tetraodon nigroviridis]	12.4384	-1.62303	0.750536	-2.16249	0.0305802	1	37.1561	1.98364	10.5028	12.656	11.4114	0.920682
C116227_c1_seq1_	PREDICTED: chloride transport protein 6 [Danio rerio]	69.812	-1.51161	0.699053	-2.16237	0.0305896	1	107.222	78.3538	44.3453	90.4003	74.6131	23.9377
C312716_c0_seq1_	F-box only protein 36 [Oreochromis mossambicus]	36.0365	-1.57603	0.72891	-2.16218	0.0306046	1	56.2649	46.6156	29.1745	40.6802	33.3564	10.1275
C6177_c46_seq1_	PREDICTED: nuclear pore complex protein Nup155 [Oreochromis niloticus]	806.106	1.50132	0.694415	2.16199	0.0306189	1	329.097	769.653	1254.5	390.529	694.34	1398.52
C147545_c0_seq1_	PREDICTED: probable exonuclease mut-7 homolog [Oreochromis niloticus]	178.646	-1.37259	0.634987	-2.1616	0.0306487	1	290.879	155.716	200.721	214.249	123.77	86.5441
C45711_c0_seq1_	DNA-directed RNA polymerases I, II, and III subunit RPABC3 [Salmo salar] gb	39.0692	-1.67713	0.776047	-2.16112	0.0306863	1	79.6201	44.6319	8.16886	56.0482	39.501	6.44477
C9892_c4_seq1_	PREDICTED: melanoma inhibitory activity protein 3 [Danio rerio] emb	107.026	1.59373	0.737893	2.15984	0.0307854	1	28.6633	158.691	98.0264	47.0082	142.204	167.564
C55313_c0_seq1_	PREDICTED: hypothetical protein LOC100698705 [Oreochromis niloticus]	3748.1	1.25468	0.580981	2.15959	0.0308044	1	1735.72	4726.03	3621.14	3060.05	4375.84	4969.84
C13380_c0_seq1_	cytokinesis protein SepA/Bni1 [Puccinia graminis f. sp. tritici CRL 75-36-700-3] gb	419.562	-1.49778	0.693558	-2.15956	0.0308071	1	909.793	427.475	232.229	457.426	269.485	220.964
C88264_c0_seq1_	PREDICTED: AT-rich interactive domain-containing protein 1B [Danio rerio]	77.6284	-1.5323	0.709741	-2.15896	0.0308532	1	114.653	118.027	65.3509	55.1442	88.6579	23.9377
C47914_c0_seq1_	PREDICTED: ADM2-like [Oreochromis niloticus]	18.0505	1.40135	0.649381	2.15798	0.0309291	1	1.0616	0	24.5066	4.52002	0.877801	77.3372
C60894_c0_seq1_	PREDICTED: glycerol-3-phosphate acyltransferase 4-like [Oreochromis niloticus]	125.653	-1.60158	0.742352	-2.15744	0.030971	1	212.32	110.092	49.0132	207.017	139.57	35.9066
C157977_c0_seq1_	PREDICTED: diamine acetyltransferase 2-like [Oreochromis niloticus]	23.8398	1.66762	0.773012	2.1573	0.030982	1	2.1232	22.8119	19.8387	6.32802	40.3788	51.5582
C234774_c0_seq1_	eomesodermin [Gadus morhua]	133.094	-1.66323	0.771064	-2.15706	0.0310008	1	261.154	60.5011	50.1802	288.377	107.969	30.3825
C73444_c0_seq1_	hypothetical protein VOLCADRAFT 98918 [Volvox carteri f. nagariensis] gb	24.9093	-1.62241	0.752307	-2.15658	0.0310385	1	62.6345	15.8691	9.33585	36.1601	25.4562	0
C27768_c2_seq1_	Cytochrome b5 domain-containing protein 2 [Salmo salar]	24.6049	-1.60433	0.744074	-2.15615	0.0310722	1	66.8809	16.861	5.8349	34.3521	23.7006	0
C31779_c0_seq1_	beta-adrenergic receptor kinase 2 [Danio rerio] gb	918.29	1.28151	0.59438	2.15605	0.0310796	1	510.631	925.369	1106.3	656.307	805.821	1505.31
C519_c8_seq1_	PREDICTED: dedicator of cytokinesis protein 9-like [Oreochromis niloticus]	520.207	-1.29498	0.600687	-2.15583	0.0310967	1	846.097	424.499	402.608	656.307	510.002	281.729
C54664_c0_seq1_	PREDICTED: merlin-like [Oreochromis niloticus]	219.527	1.45359	0.674359	2.15551	0.0311217	1	85.9898	297.546	274.24	130.176	192.238	336.969
C116765_c0_seq1_	PREDICTED: titin-like [Xenopus (Silurana) tropicalis]	11.5216	-1.66771	0.773929	-2.15486	0.0311726	1	29.7249	11.9019	10.5028	8.13603	7.02241	1.84136
C127146_c0_seq1_	PREDICTED: S1 RNA-binding domain-containing protein 1 [Oreochromis niloticus]	98.2352	1.40874	0.653863	2.15449	0.0312019	1	39.2793	101.166	113.197	119.328	73.7353	142.706
C7847_c12_seq1_	PREDICTED: sortilin-like [Oreochromis niloticus]	53.7732	1.62072	0.752606	2.15347	0.0312816	1	8.49282	87.2802	61.85	41.5842	55.3014	68.1304
C66002_c0_seq1_	novel protein (zgc:55781) [Danio rerio]	93.6644	-1.62961	0.757715	-2.15069	0.0315005	1	179.411	51.5747	39.6773	165.433	99.1915	26.6998
C117069_c0_seq1_	meiosis-specific nuclear structural protein 1 [Danio rerio] sp	305.83	1.3395	0.622824	2.15068	0.0315013	1	122.084	242.996	333.756	401.378	337.953	396.814
C130242_c0_seq1_	MAP3K12-binding inhibitory protein 1 [Salmo salar] gb	418.845	1.43548	0.667765	2.14968	0.0315806	1	166.671	535.583	509.971	223.289	445.045	632.508
C3289_c1_seq1_	superoxide dismutase [Oncorhynchus mykiss] gb	165.5	-1.57931	0.734732	-2.14951	0.0315942	1	297.249	163.65	67.6849	276.625	132.548	55.2409
C73744_c0_seq1_	PREDICTED: disks large homolog 5-like [Oreochromis niloticus]	341.772	1.32873	0.618174	2.14945	0.0315988	1	154.994	454.254	346.593	244.081	358.143	492.565
C28449_c2_seq1_	hypothetical protein CAEBREN 15845 [Caenorhabditis brenneri]	3415.52	-1.28372	0.597297	-2.14922	0.0316172	1	5101	2960.59	2814.76	4829.19	3071.42	1716.15
C85983_c0_seq1_	unnamed protein product [Tetraodon nigroviridis]	96.3088	1.65612	0.770719	2.1488	0.0316506	1	20.1704	51.5747	206.556	84.0723	36.8676	178.612
C344806_c0_seq1_	aminomethyltransferase [Danio rerio] emb	152.627	1.51826	0.707264	2.14667	0.0318195	1	55.2033	160.675	221.726	72.3203	154.493	251.346
C57404_c0_seq1_	uncharacterized protein LOC559351 [Danio rerio] gb	196.624	1.62629	0.757599	2.14663	0.0318226	1	37.1561	289.612	285.91	62.3762	222.961	281.729
C70409_c0_seq1_	PREDICTED: haloacid dehalogenase-like hydrolase domain-containing protein 3-like [Oreochromis niloticus]	112.308	-1.45195	0.676558	-2.14608	0.0318667	1	183.657	89.2639	91.0245	168.145	94.8025	46.9548
C105962_c0_seq1_	PREDICTED: hypothetical protein LOC100333297 [Danio rerio]	60.4206	-1.50838	0.703433	-2.14432	0.0320075	1	95.5442	50.5829	91.0245	51.5282	52.668	21.1757
C160440_c0_seq1_	PREDICTED: calmodulin-regulated spectrin-associated protein 2-like [Oreochromis niloticus]	82.9852	1.54087	0.718829	2.14359	0.0320659	1	28.6633	83.313	45.5122	72.3203	128.159	139.944
C177087_c0_seq1_	sodium/iodide cotransporter [Danio rerio] gb	4.91032	-1.30416	0.608546	-2.14308	0.0321068	1	25.4784	0.991821	1.16698	0.904003	0	0.920682
C96448_c0_seq1_	uncharacterized protein LOC100145372 [Xenopus (Silurana) tropicalis] gb	95.4771	-1.60878	0.751458	-2.14087	0.0322841	1	194.273	75.3784	43.1783	167.241	60.5683	32.2239
C30032_c0_seq1_	adenomatous polyposis coli protein [Danio rerio]	363.578	1.60562	0.750015	2.14079	0.0322911	1	140.131	259.857	99.1934	355.273	521.414	805.596
C31542_c0_seq1_	methylcrotonoyl-Coenzyme A carboxylase 2 [Danio rerio] emb	28.8169	-1.64758	0.769646	-2.1407	0.0322983	1	57.3265	37.6892	8.16886	41.5842	27.2118	0.920682
C8343_c5_seq1_	PREDICTED: liprin-beta-2-like [Oreochromis niloticus]	36.6313	1.65635	0.773921	2.14021	0.0323382	1	4.24641	54.5501	45.5122	14.4641	43.0122	58.0029
C96383_c1_seq1_	PREDICTED: zinc finger protein 729-like [Monodelphis domestica]	44.5764	1.55215	0.725286	2.14005	0.0323506	1	11.6776	38.681	60.683	55.1442	37.7454	63.527
C23994_c3_seq1_	Transcription factor RelB [Salmo salar]	253.354	-1.52683	0.71362	-2.13956	0.0323906	1	494.706	172.577	152.874	413.13	178.194	108.64
C32248_c0_seq1_	PREDICTED: bromodomain-containing protein 8-like [Danio rerio]	56.5887	1.612	0.753669	2.13887	0.0324459	1	7.43121	66.452	82.8556	55.1442	63.2017	64.4477
C25525_c0_seq1_	Ras-related protein Rab-18 [Salmo salar] gb	448.095	-1.48863	0.696124	-2.13845	0.0324801	1	800.448	352.096	290.578	748.515	306.352	190.581
C52597_c0_seq1_	52 kDa Ro protein [Salmo salar] gb	24.0437	-1.61666	0.756339	-2.13748	0.0325591	1	48.8337	15.8691	22.1726	29.8321	20.1894	7.36545
C146283_c0_seq1_	PREDICTED: matrix metalloproteinase-19-like [Oreochromis niloticus]	33.8895	-1.6525	0.773113	-2.13746	0.0325607	1	63.6961	62.4847	9.33585	35.2561	30.723	1.84136
C338_c327_seq1_	PREDICTED: mitochondrial carnitine/acylcarnitine carrier protein CACL-like [Oreochromis niloticus] ref	206.645	-1.55844	0.729298	-2.13691	0.0326056	1	443.75	215.225	101.527	282.049	107.092	90.2268
C49751_c0_seq1_	PREDICTED: collagen alpha-1(XIV) chain-like [Oreochromis niloticus]	10.397	-1.62511	0.760849	-2.13592	0.0326857	1	28.6633	9.91821	5.8349	12.656	4.389	0.920682
C1464_c5_seq1_	FAM29A [Salmo salar] gb	346.899	-1.4321	0.670772	-2.13501	0.0327603	1	560.526	470.123	198.387	428.498	275.629	148.23
C150224_c0_seq1_	PREDICTED: G-protein coupled receptor 98-like [Oreochromis niloticus]	40.8584	1.56835	0.734705	2.13467	0.0327879	1	9.55442	58.5174	47.8462	36.1601	35.9898	57.0823
C13345_c0_seq1_	PREDICTED: U3 small nucleolar RNA-associated protein 6 homolog [Oreochromis niloticus]	115.557	1.37692	0.645073	2.13451	0.032801	1	54.1417	104.141	120.199	83.1683	145.715	185.978
C12908_c0_seq1_	L-xylulose reductase [Salmo salar] gb	104.928	-1.47362	0.69045	-2.13429	0.0328195	1	141.193	117.035	70.0188	136.505	131.67	33.1445
C133981_c0_seq1_	PREDICTED: urea transporter 2-like [Oreochromis niloticus]	41.6524	1.64664	0.77161	2.13403	0.0328404	1	4.24641	56.5338	65.3509	5.42402	27.2118	91.1475
C11443_c2_seq1_	Phosphoglycerate mutase 1 [Osmerus mordax]	175.318	1.42467	0.667629	2.13393	0.0328488	1	61.5729	144.806	245.066	139.217	226.473	234.774
C87280_c0_seq1_	Zinc finger MYND domain-containing protein 12 [Osmerus mordax]	68.4821	1.42708	0.669118	2.13278	0.032943	1	27.6016	80.3375	56.0151	83.1683	58.8126	104.958
C28480_c0_seq1_	Lymphocyte antigen 86 precursor [Esox lucius]	19.0032	-1.65201	0.774613	-2.1327	0.0329497	1	35.0329	19.8364	15.1707	28.9281	12.2892	2.76204
C16328_c0_seq1_	RNA-binding protein 39 [Salmo salar]	265.785	-1.59096	0.746744	-2.13053	0.033128	1	438.442	382.843	80.5217	378.777	241.395	72.7338
C79962_c0_seq1_	cAMP-dependent protein kinase type I-beta regulatory subunit [Danio rerio] gb	28.475	1.64608	0.77301	2.12944	0.0332181	1	2.1232	31.7383	39.6773	24.4081	34.2342	38.6686
C71686_c0_seq1_	LBH [Salmo salar]	60.2423	-1.56515	0.735335	-2.12849	0.0332965	1	100.852	88.2721	31.5085	74.1283	48.279	18.4136
C167917_c0_seq1_	PREDICTED: glycosyltransferase 1 domain-containing protein 1-like [Oreochromis niloticus]	62.5773	-1.60066	0.752229	-2.12788	0.0333467	1	140.131	62.4847	30.3415	32.5441	86.0245	23.9377
C31_c4_seq1_	creatine kinase-2 [Salmo salar]	1792.93	-1.49628	0.703233	-2.12772	0.0333607	1	3082.89	1472.85	893.907	3093.5	1503.67	710.766
C76698_c0_seq1_	Monocarboxylate transporter 9 [Salmo salar] gb	344.996	1.51236	0.711027	2.12701	0.0334196	1	164.548	219.192	513.471	200.689	248.418	723.656
C171132_c0_seq1_	PREDICTED: desmoplakin-like [Oreochromis niloticus]	65.9189	1.41742	0.666793	2.12572	0.0335262	1	33.9713	62.4847	53.6811	58.7602	62.3239	124.292
C9340_c1_seq1_	small ubiquitin-related modifier 1 [Salmo salar] gb	42.041	-1.64276	0.773039	-2.12507	0.0335809	1	65.8193	50.5829	15.1707	65.9923	49.1568	5.52409
C5126_c4_seq1_	PREDICTED: 2-acylglycerol O-acyltransferase 2-A-like [Oreochromis niloticus]	26.9723	-1.64937	0.776277	-2.12472	0.03361	1	62.6345	21.8201	8.16886	47.0082	16.6782	5.52409
C65708_c0_seq1_	GH3 domain-containing protein [Salmo salar] gb	238.247	1.60354	0.754827	2.12439	0.0336378	1	42.4641	310.44	400.274	87.6883	276.507	312.111
C205522_c0_seq1_	1-phosphatidylinositol-4,5-bisphosphate phosphodiesterase epsilon-1 [Danio rerio] gb	47.186	1.45587	0.685352	2.12426	0.033648	1	19.1088	52.5665	44.3453	37.9681	51.7902	77.3372
C95131_c0_seq1_	unnamed protein product [Tetraodon nigroviridis]	282.487	-1.27952	0.602399	-2.12403	0.0336675	1	362.006	369.949	256.736	307.361	278.263	120.609
C57192_c0_seq1_	PREDICTED: endoplasmic reticulum mannosyl-oligosaccharide 1,2-alpha-mannosidase-like [Oreochromis niloticus]	218.97	1.44868	0.682305	2.12322	0.0337353	1	94.4826	208.282	340.758	149.161	150.104	371.035
C10652_c0_seq1_	Vesicle-associated membrane protein 8 [Salmo salar]	695.208	1.3634	0.642332	2.12258	0.0337891	1	331.22	705.185	934.751	398.666	685.562	1115.87
C41943_c0_seq1_	RAB23, member RAS oncogene family [Danio rerio]	175.835	1.50771	0.710341	2.12252	0.033794	1	38.2177	191.421	241.565	151.873	242.273	189.66
C38364_c0_seq1_	phosphotriesterase-related protein [Salmo salar] sp	376.999	1.45247	0.684341	2.12244	0.0338007	1	166.671	305.481	591.659	215.153	325.664	657.367
C270241_c0_seq1_	unnamed protein product [Tetraodon nigroviridis]	13.7104	1.64529	0.775194	2.12242	0.0338025	1	1.0616	10.91	18.6717	11.752	13.167	26.6998
C57382_c0_seq1_	PREDICTED: RNA-binding motif, single-stranded-interacting protein 2-like [Oreochromis niloticus]	19.8127	1.64685	0.776109	2.12194	0.033843	1	5.30801	9.91821	28.0075	11.752	11.4114	52.4788
C102449_c0_seq1_	PREDICTED: DNA excision repair protein ERCC-6-like [Oreochromis niloticus]	101.72	-1.44266	0.67994	-2.12175	0.0338591	1	171.98	113.068	63.017	133.793	84.2689	44.1927
C37568_c0_seq1_	beta-centractin [Danio rerio] gb	518.798	-1.53337	0.72296	-2.12096	0.033925	1	776.031	645.675	194.886	763.883	576.715	155.595
C34349_c1_seq1_	PREDICTED: homeobox protein AKR-like [Oreochromis niloticus]	614.843	-1.2866	0.60662	-2.12092	0.0339282	1	1010.65	665.512	388.605	682.523	604.805	336.969
C44008_c0_seq1_	PREDICTED: microtubule-associated serine/threonine-protein kinase 2-like [Danio rerio]	45.7202	1.62521	0.766301	2.12085	0.0339345	1	16.9856	50.5829	16.3377	26.2161	50.0346	114.165
C80834_c0_seq1_	PREDICTED: nuclear pore membrane glycoprotein 210-like [Oreochromis niloticus]	2080.08	1.31402	0.619652	2.12058	0.033957	1	1041.43	2908.02	1406.21	1754.67	2114.62	3255.53
C35564_c4_seq1_	aldehyde dehydrogenase family 16 member A1 [Danio rerio]	642.525	-1.17243	0.55295	-2.12033	0.0339785	1	862.021	619.888	606.83	810.891	624.994	330.525
C6541_c10_seq1_	Succinate dehydrogenase iron-sulfur protein, mitochondrial precursor [Oncorhynchus mykiss]	109.259	-1.36182	0.642467	-2.11968	0.0340334	1	162.425	104.141	150.541	94.0164	96.5581	47.8754
C56052_c0_seq1_	PREDICTED: si:ch211-107m4.1 [Danio rerio]	81.6246	-1.51266	0.713786	-2.11921	0.0340728	1	140.131	90.2557	52.5141	122.04	54.4236	30.3825
C52203_c0_seq1_	PREDICTED: caskin-2-like [Oreochromis niloticus]	148.037	-1.44151	0.680258	-2.11907	0.0340848	1	272.832	115.051	136.537	202.497	90.4135	70.8925
C78898_c0_seq1_	Coproporphyrinogen III oxidase, mitochondrial precursor [Salmo salar] gb	20.5325	-1.63641	0.772243	-2.11904	0.0340874	1	46.7105	14.8773	10.5028	28.0241	17.556	5.52409
C53549_c0_seq1_	RNA-binding protein 4 [Salmo salar] gb	278.174	-1.38582	0.653989	-2.11903	0.0340881	1	508.507	223.16	211.223	377.873	201.894	146.388
C56179_c3_seq1_	PREDICTED: Golgi reassembly-stacking protein 2-like [Oreochromis niloticus]	75.5478	1.63011	0.769324	2.11888	0.0341005	1	26.54	18.8446	89.8575	42.4882	88.6579	186.898
C4962_c0_seq1_	PREDICTED: peroxisomal membrane protein 2-like [Oreochromis niloticus]	175.729	-1.53528	0.724612	-2.11876	0.0341106	1	399.162	121.994	77.0207	216.961	153.615	85.6234
C8607_c3_seq1_	PREDICTED: UDP-N-acetylglucosamine--peptide N-acetylglucosaminyltransferase 110 kDa subunit isoform 2 [Oreochromis niloticus]	278.313	-1.29512	0.611266	-2.11875	0.0341118	1	447.996	282.669	187.884	336.289	267.729	147.309
C40265_c1_seq1_	PREDICTED: DDB1- and CUL4-associated factor 8-like [Oreochromis niloticus]	418.958	1.30351	0.615254	2.11865	0.0341198	1	191.088	382.843	612.665	348.041	387.11	591.998
C42167_c0_seq1_	PREDICTED: sodium-dependent multivitamin transporter-like [Oreochromis niloticus]	20.4163	-1.57128	0.741651	-2.11863	0.0341219	1	55.2033	29.7546	4.66792	13.5601	19.3116	0
C77870_c0_seq1_	Peptidyl-tRNA hydrolase 2, mitochondrial precursor [Salmo salar]	58.7075	-1.39341	0.657722	-2.11855	0.0341289	1	92.3594	69.4275	56.0151	54.2402	54.4236	25.7791
C4137_c12_seq1_	ribosome binding protein 1 homolog 180kDa [Danio rerio]	1961.56	1.14508	0.54054	2.1184	0.0341411	1	1069.03	2037.2	2039.88	1605.51	2318.27	2699.44
C74400_c0_seq1_	PREDICTED: WD repeat-containing protein 25-like [Oreochromis niloticus]	249.463	1.32032	0.623707	2.1169	0.0342686	1	115.715	195.389	355.929	235.041	227.35	367.352
C147371_c0_seq1_	PREDICTED: threonine synthase-like 1-like [Oreochromis niloticus]	94.3342	-1.57294	0.74346	-2.1157	0.0343702	1	159.24	101.166	37.3434	155.489	85.1467	27.6204
C112933_c0_seq1_	FMVIB [Morone saxatilis]	226.311	1.18322	0.559382	2.11523	0.0344103	1	131.639	245.972	212.39	222.385	198.383	347.097
C101095_c0_seq1_	PREDICTED: hypothetical protein LOC100693244 [Oreochromis niloticus]	41.1012	1.47502	0.697339	2.11521	0.0344121	1	16.9856	32.7301	46.6792	39.7762	38.6232	71.8132
C13360_c0_seq1_	PREDICTED: hypothetical protein LOC569340 [Danio rerio]	193.906	-1.20559	0.570044	-2.1149	0.0344386	1	282.386	213.241	213.557	180.801	169.416	104.037
C54942_c2_seq1_	PREDICTED: midasin [Danio rerio]	76.6251	-1.63418	0.772718	-2.11485	0.0344425	1	125.269	52.5665	72.3528	141.929	66.7129	0.920682
C34538_c0_seq1_	PREDICTED: ubiquitin carboxyl-terminal hydrolase 2-like [Danio rerio] ref	51.9316	-1.53362	0.725209	-2.11472	0.0344537	1	69.0041	61.4929	39.6773	73.2243	55.3014	12.8895
C106189_c0_seq1_	PREDICTED: receptor-interacting serine/threonine-protein kinase 4-like [Oreochromis niloticus]	33.1623	-1.61408	0.763335	-2.11451	0.0344714	1	74.3121	20.8282	49.0132	26.2161	17.556	11.0482
C166200_c0_seq1_	PREDICTED: nuclear factor of activated T-cells 5-like [Oreochromis niloticus]	30.7638	1.58282	0.748742	2.11397	0.0345175	1	8.49282	39.6728	24.5066	19.8881	38.6232	53.3995
C32932_c0_seq1_	rab3 GTPase-activating protein catalytic subunit [Danio rerio] sp	26.1811	-1.64077	0.7762	-2.11384	0.0345286	1	41.4025	32.7301	17.5047	44.2962	19.3116	1.84136
C29194_c1_seq1_	PREDICTED: Golgi reassembly-stacking protein 2-like [Oreochromis niloticus]	219.533	-1.55553	0.73595	-2.11364	0.034546	1	423.579	286.636	66.5179	253.121	205.405	81.9407
C4767_c3_seq1_	replication factor C subunit 5 [Salmo salar] gb	138.837	-1.44985	0.686004	-2.11348	0.0345601	1	214.444	141.83	77.0207	197.977	148.348	53.3995
C93288_c1_seq1_	Ethanolamine kinase 1 [Dicentrarchus labrax]	61.7266	1.63221	0.772293	2.11346	0.0345618	1	1.0616	58.5174	54.8481	123.848	28.9674	103.116
C79532_c0_seq1_	PREDICTED: serine/threonine-protein kinase Nek3-like [Oreochromis niloticus]	351.156	1.55696	0.736893	2.11287	0.0346121	1	124.207	245.972	607.997	131.985	345.853	650.922
C42273_c0_seq1_	PREDICTED: casein kinase II subunit alpha-like [Oreochromis niloticus]	383.436	-1.26286	0.597729	-2.11277	0.0346209	1	521.247	430.45	283.576	461.042	426.611	177.692
C120566_c0_seq1_	PREDICTED: arf-GAP with SH3 domain, ANK repeat and PH domain-containing protein 2-like [Oreochromis niloticus]	127.502	1.34409	0.636459	2.11183	0.0347009	1	59.4497	149.765	148.207	88.5923	122.892	196.105
C47414_c2_seq1_	PREDICTED: neuralized-like protein 4-like [Oreochromis niloticus]	127.842	-1.31541	0.622988	-2.11145	0.0347333	1	202.766	125.961	98.0264	159.105	116.747	64.4477
C78136_c0_seq1_	PREDICTED: serine/threonine-protein kinase Chk1-like [Oreochromis niloticus]	159.116	-1.53205	0.725855	-2.11068	0.0348	1	165.61	227.127	162.21	146.449	223.839	29.4618
C28868_c0_seq1_	PREDICTED: UDP-GlcNAc:betaGal beta-1,3-N-acetylglucosaminyltransferase 2-like [Oreochromis niloticus]	145.217	1.49258	0.707299	2.11025	0.0348367	1	75.3737	129.929	84.0226	92.2084	170.293	319.476
C200028_c0_seq1_	PREDICTED: plexin-B1 [Oreochromis niloticus]	107.573	1.39649	0.661772	2.11023	0.0348388	1	38.2177	135.879	82.8556	123.848	123.77	140.864
C16566_c0_seq1_	PREDICTED: protein phosphatase 1 regulatory subunit 15B-like [Ornithorhynchus anatinus]	99.9118	-1.30342	0.617773	-2.10987	0.0348696	1	143.316	95.2148	94.5254	122.944	97.4359	46.0341
C6535_c1_seq1_	High mobility group protein B3 [Salmo salar]	21.5136	-1.63643	0.775719	-2.10957	0.0348958	1	35.0329	33.7219	21.0057	22.6001	15.8004	0.920682
C26029_c1_seq1_	PREDICTED: low-density lipoprotein receptor-related protein 10-like [Danio rerio]	5.6273	-1.48292	0.703276	-2.10859	0.0349797	1	23.3552	2.97546	1.16698	2.71201	2.6334	0.920682
C6298_c2_seq1_	Cell growth regulator with RING finger domain protein 1 [Salmo salar] gb	97.9086	1.48298	0.703314	2.10857	0.0349821	1	32.9097	130.92	92.1915	56.0482	129.915	145.468
C63437_c0_seq1_	PREDICTED: myoferlin-like [Oreochromis niloticus]	5.51206	1.42326	0.675046	2.10839	0.0349976	1	1.0616	0.991821	3.50094	0.904003	1.7556	24.8584
C104889_c0_seq1_	PREDICTED: disintegrin and metalloproteinase domain-containing protein 17-like [Oreochromis niloticus]	50.4771	1.62977	0.773025	2.10831	0.0350046	1	5.30801	47.6074	95.6924	6.32802	43.89	104.037
C155605_c0_seq1_	PREDICTED: myosin light chain kinase, smooth muscle isoform 1 [Canis lupus familiaris]	324.543	1.54127	0.731921	2.10579	0.0352223	1	99.7906	361.023	120.199	301.033	546.87	518.344
C43088_c0_seq1_	SWI/SNF-related matrix-associated actin-dependent regulator of chromatin subfamily E member 1-related isoform 1 [Danio rerio] gb	53.3172	-1.59797	0.759409	-2.10423	0.0353582	1	69.0041	42.6483	44.3453	99.4404	56.1792	8.28613
C60456_c0_seq1_	PREDICTED: leucine-rich repeat and calponin homology domain-containing protein 4 [Danio rerio]	69.3416	1.61955	0.769699	2.10413	0.0353671	1	5.30801	107.117	63.017	60.5682	102.703	77.3372
C25350_c0_seq1_	PREDICTED: hypothetical protein LOC100705864 [Oreochromis niloticus]	205.09	1.62704	0.773398	2.10376	0.0353995	1	55.2033	56.5338	436.451	83.1683	154.493	444.689
C131044_c2_seq1_	PREDICTED: serine/threonine-protein kinase WNK4-like [Danio rerio]	48.1684	1.48036	0.70368	2.10374	0.0354011	1	19.1088	54.5501	42.0113	32.5441	57.9348	82.8613
C38639_c0_seq1_	PREDICTED: glycosyltransferase 8 domain-containing protein 1-like [Oreochromis niloticus]	110.104	1.52833	0.726494	2.1037	0.0354046	1	58.3881	75.3784	92.1915	57.8562	107.969	268.839
C946_c0_seq1_	Suppressor of G2 allele of SKP1 homolog [Salmo salar]	50.6589	1.62689	0.773432	2.10347	0.035425	1	4.24641	54.5501	56.0151	28.9281	93.9247	66.2891
C86683_c0_seq1_	desmocollin a [Danio rerio]	40.5419	1.63183	0.776236	2.10224	0.0355322	1	1.0616	46.6156	52.5141	31.6401	56.1792	55.2409
C187399_c0_seq1_	brain-specific homeobox protein homolog [Danio rerio] sp	119.317	-1.58217	0.752962	-2.10127	0.0356176	1	312.111	92.2393	75.8537	135.601	43.0122	57.0823
C66844_c0_seq1_	RecName: Full=Delta-like protein D; Short=DeltaD; AltName: Full=After eight protein; Flags: Precursor emb	160.131	-1.62952	0.775496	-2.10126	0.0356177	1	305.741	129.929	24.5066	323.633	146.593	30.3825
C40332_c0_seq1_	GTP-binding protein 10 [Salmo salar] gb	82.2753	-1.61276	0.767533	-2.10122	0.0356216	1	159.24	109.1	17.5047	109.384	77.2465	21.1757
C190818_c0_seq1_	PREDICTED: oxysterol-binding protein-related protein 10-like [Oreochromis niloticus]	21.7773	-1.62916	0.775437	-2.10096	0.0356446	1	42.4641	10.91	19.8387	37.9681	15.8004	3.68273
C96309_c1_seq1_	Methyltransferase-like protein 2 [Salmo salar] gb	22.6709	-1.62607	0.77399	-2.1009	0.0356502	1	62.6345	6.94275	18.6717	34.3521	7.90021	5.52409
C72721_c0_seq1_	LMBR1 domain-containing protein 2-B [Danio rerio] sp	17.9266	-1.61056	0.76681	-2.10033	0.0356995	1	36.0945	17.8528	11.6698	16.2721	21.0672	4.60341
C16787_c0_seq1_	Dynein light chain Tctex-type 1 [Oncorhynchus mykiss] gb	474.652	-1.36443	0.649673	-2.10018	0.0357134	1	786.647	376.892	287.077	652.69	513.513	231.091
C50289_c0_seq1_	Syntaxin-18 [Dicentrarchus labrax]	111.574	-1.44092	0.686229	-2.09977	0.035749	1	149.686	152.74	75.8537	143.737	110.603	36.8273
C12912_c0_seq1_	PREDICTED: IQ motif and SEC7 domain-containing protein 2-like [Oreochromis niloticus]	33.6399	1.62776	0.775302	2.09951	0.0357717	1	2.1232	18.8446	72.3528	18.0801	33.3564	57.0823
C110584_c0_seq1_	PREDICTED: uncharacterized protein C5orf42-like, partial [Danio rerio]	35.412	-1.54962	0.738481	-2.09839	0.0358705	1	79.6201	21.8201	33.8424	33.4481	28.0896	15.6516
C29108_c0_seq1_	DNA replication licensing factor MCM2 [Salmo salar] gb	247.635	-1.22745	0.584994	-2.09822	0.0358855	1	418.271	203.323	268.406	235.945	209.794	150.071
C57629_c0_seq1_	PREDICTED: magnesium transporter NIPA2-like [Oreochromis niloticus]	1109.75	-1.38989	0.662705	-2.09729	0.0359676	1	1486.24	1439.13	629.003	1227.64	1466.81	409.703
C6887_c0_seq1_	unnamed protein product [Tetraodon nigroviridis]	6.58931	-1.1419	0.544487	-2.0972	0.0359754	1	35.0329	0.991821	0	0	3.5112	0
C3711_c1_seq1_	plexin B2a [Danio rerio]	218.887	-1.47831	0.704982	-2.09695	0.0359984	1	395.978	133.896	190.218	359.793	140.448	92.9888
C131548_c0_seq1_	PREDICTED: zinc finger protein 2-like isoform 3 [Nomascus leucogenys]	67.6258	1.50761	0.719101	2.09651	0.0360366	1	29.7249	47.6074	87.5235	37.9681	67.5907	135.34
C20847_c0_seq1_	Heat shock 70 kDa protein 14 [Salmo salar]	241.052	1.53824	0.733795	2.09628	0.0360573	1	56.2649	242.004	233.396	133.793	468.746	312.111
C132808_c0_seq1_	serine/threonine-protein kinase 33 [Danio rerio] gb	29.37	-1.62689	0.776123	-2.09617	0.0360671	1	46.7105	58.5174	17.5047	25.3121	26.334	1.84136
C10569_c0_seq1_	PREDICTED: zinc finger and BTB domain-containing protein 6-like [Oreochromis niloticus]	553.591	-1.28315	0.612232	-2.09586	0.0360945	1	714.458	523.681	435.284	699.699	713.652	234.774
C132708_c0_seq1_	PREDICTED: zinc finger BED domain-containing protein 1-like [Amphimedon queenslandica]	27.3141	-1.62347	0.774652	-2.09574	0.0361053	1	48.8337	23.8037	17.5047	57.8562	14.0448	1.84136
C7326_c3_seq1_	PREDICTED: hypothetical protein LOC100703105 [Oreochromis niloticus]	24.4874	1.581	0.754622	2.09509	0.0361626	1	1.0616	7.93457	56.0151	7.23203	16.6782	58.0029
C90310_c1_seq1_	PREDICTED: transforming growth factor-beta receptor-associated protein 1 homolog [Oreochromis niloticus]	33.844	1.57223	0.750464	2.09501	0.0361697	1	13.8008	16.861	32.6755	32.5441	29.8452	77.3372
C35623_c1_seq1_	DNA-directed RNA polymerase III subunit RPC9 [Esox lucius]	87.5769	1.51619	0.723841	2.09464	0.0362027	1	22.2936	139.847	99.1934	54.2402	94.8025	115.085
C21364_c1_seq1_	peroxisomal biogenesis factor 16 [Danio rerio] sp	123.524	1.46787	0.700803	2.09456	0.0362103	1	44.5873	128.937	185.55	65.0882	126.403	190.581
C56764_c2_seq1_	THAP domain-containing protein 1 [Salmo salar] sp	34.6418	-1.62055	0.774125	-2.0934	0.0363139	1	50.9569	42.6483	15.1707	50.6242	44.7678	3.68273
C22076_c0_seq1_	pescadillo homolog [Salmo salar] sp	372.851	-1.22627	0.585778	-2.09339	0.0363139	1	526.555	398.712	280.075	467.37	376.577	187.819
C300271_c0_seq1_	PREDICTED: probable ribonuclease ZC3H12C-like [Oreochromis niloticus]	27.4059	-1.62075	0.774576	-2.09244	0.0363993	1	67.9425	13.8855	11.6698	41.5842	21.0672	8.28613
C94818_c2_seq1_	PREDICTED: tripartite motif-containing protein 35-like [Oreochromis niloticus]	82.0968	-1.49944	0.716686	-2.09219	0.0364213	1	104.037	95.2148	59.516	128.368	84.2689	21.1757
C22813_c1_seq1_	PREDICTED: hypothetical protein LOC100709243 [Oreochromis niloticus]	618.426	1.41427	0.675995	2.09213	0.036427	1	307.865	509.796	933.585	408.61	409.055	1141.65
C30372_c0_seq1_	monoglyceride lipase [Salmo salar] gb	61.8361	1.50373	0.718772	2.09209	0.0364308	1	28.6633	65.4602	68.8519	35.2561	43.89	128.895
C134503_c0_seq1_	PREDICTED: gamma-aminobutyric acid receptor subunit alpha-2-like, partial [Danio rerio]	44.8391	1.58483	0.757764	2.09145	0.0364876	1	4.24641	73.3947	38.5104	1.80801	35.9898	115.085
C185254_c0_seq1_	Myo5a protein [Danio rerio]	38.9867	1.61004	0.769873	2.09131	0.0365001	1	2.1232	78.3538	8.16886	45.2002	24.5784	75.4959
C22140_c0_seq1_	Coiled-coil-helix-coiled-coil-helix domain-containing protein 1 [Salmo salar] gb	68.0534	-1.55588	0.74416	-2.09079	0.0365468	1	123.146	62.4847	28.0075	109.384	63.2017	22.0964
C206709_c0_seq1_	PREDICTED: diacylglycerol kinase eta [Oreochromis niloticus]	5.38996	1.44467	0.691351	2.08963	0.0366508	1	0	2.97546	4.66792	1.80801	2.6334	20.255
C64001_c0_seq1_	PREDICTED: hypothetical protein LOC100704956 [Oreochromis niloticus]	64.8776	1.52675	0.73066	2.08955	0.0366579	1	20.1704	83.313	98.0264	41.5842	42.1344	104.037
C6076_c3_seq1_	PREDICTED: homer protein homolog 2-like [Oreochromis niloticus]	74.7809	-1.61213	0.771523	-2.08955	0.0366584	1	179.411	17.8528	19.8387	184.417	33.3564	13.8102
C46917_c0_seq1_	RING finger protein 103 [Danio rerio] gb	183.804	-1.39403	0.667531	-2.08834	0.0367672	1	290.879	160.675	109.696	263.969	197.505	80.0993
C8070_c1_seq1_	14-3-3C1 protein [Oncorhynchus mykiss] ref	309.636	1.31129	0.627987	2.08809	0.0367899	1	167.733	230.102	389.772	219.673	323.908	526.63
C78426_c1_seq1_	beta-hexosaminidase subunit beta [Salmo salar] gb	376.746	1.2307	0.5895	2.0877	0.0368249	1	207.012	408.63	336.09	273.009	452.945	582.791
C1825_c0_seq1_	PREDICTED: 3-hydroxyacyl-CoA dehydratase-like [Oreochromis niloticus]	58.4025	1.55853	0.746535	2.08768	0.0368266	1	14.8624	58.5174	40.8443	38.8721	107.092	90.2268
C83090_c0_seq1_	PREDICTED: zinc finger protein 551 isoform 2 [Pan troglodytes]	29.4267	1.56383	0.749273	2.08713	0.0368766	1	4.24641	2.97546	64.1839	9.04003	11.4114	84.7027
C746_c0_seq1_	ATP synthase lipid-binding protein, mitochondrial precursor [Salmo salar] gb	155.336	-1.40998	0.675766	-2.0865	0.0369337	1	254.784	153.732	84.0226	213.345	158.004	68.1304
C168612_c0_seq1_	PREDICTED: FERM, RhoGEF and pleckstrin domain-containing protein 2-like [Oreochromis niloticus]	10.1702	1.5382	0.737231	2.08645	0.0369379	1	1.0616	7.93457	1.16698	5.42402	12.2892	33.1445
C24382_c0_seq1_	Ran-binding protein 9 [Salmo salar] gb	703.431	-1.03326	0.495239	-2.08639	0.036943	1	978.797	697.25	696.687	696.083	716.285	435.482
C46411_c0_seq1_	PREDICTED: beta-1,4-galactosyltransferase 5-like [Oreochromis niloticus]	358.864	1.2754	0.611305	2.08635	0.0369467	1	199.581	399.704	354.762	226.001	377.454	595.681
C101177_c0_seq1_	PREDICTED: sex comb on midleg-like protein 2-like [Danio rerio]	21.342	-1.61847	0.775802	-2.08619	0.0369616	1	47.7721	22.8119	4.66792	28.9281	20.1894	3.68273
C186709_c0_seq1_	PREDICTED: centromere protein O-like [Oreochromis niloticus]	139.425	1.61238	0.772941	2.08603	0.0369756	1	31.8481	90.2557	323.254	43.3922	79.8799	267.918
C14214_c0_seq1_	26S proteasome non-ATPase regulatory subunit 6 [Salmo salar]	192.648	-1.32664	0.636098	-2.08559	0.0370159	1	281.325	190.43	134.203	269.393	193.994	86.5441
C90208_c0_seq1_	TAF6-like RNA polymerase II p300/CBP-associated factor-associated factor 65 kDa subunit 6L [Salmo salar] gb	17.5525	-1.58652	0.760799	-2.08533	0.037039	1	38.2177	8.92639	16.3377	19.8881	21.945	0
C9248_c5_seq1_	PREDICTED: clathrin heavy chain 1-like [Oreochromis niloticus]	348.809	-1.13356	0.54369	-2.08493	0.0370756	1	527.616	322.342	310.417	396.858	324.786	210.836
C63590_c0_seq1_	PREDICTED: msx2-interacting protein [Oreochromis niloticus]	83.0863	1.44036	0.690904	2.08474	0.0370926	1	32.9097	113.068	50.1802	73.2243	96.5581	132.578
C33467_c5_seq1_	PREDICTED: hypothetical protein LOC100696008 [Oreochromis niloticus]	528.561	-1.3239	0.635087	-2.08459	0.0371066	1	726.136	627.823	324.421	634.61	634.65	223.726
C4870_c14_seq1_	unnamed protein product [Tetraodon nigroviridis]	195.473	1.60049	0.767846	2.08439	0.0371245	1	37.1561	218.201	348.927	43.3922	218.572	306.587
C42151_c1_seq1_	PREDICTED: queuine tRNA-ribosyltransferase subunit qtrtd1-like [Oreochromis niloticus]	167.16	1.52254	0.730629	2.08387	0.037172	1	52.0185	146.789	229.895	65.9923	244.029	264.236
C2687_c1_seq1_	Pleiotrophic factor-alpha-2 precursor [Salmo salar]	73.5495	-1.51859	0.729165	-2.08264	0.0372838	1	134.823	101.166	38.5104	47.0082	92.1691	27.6204
C22559_c1_seq1_	PREDICTED: FH1/FH2 domain-containing protein 3 [Danio rerio]	214.537	1.43013	0.686972	2.08179	0.0373613	1	81.7433	228.119	264.905	105.768	283.53	323.159
C13586_c1_seq1_	unnamed protein product [Tetraodon nigroviridis]	65.0043	-1.47354	0.707824	-2.08178	0.0373624	1	91.2978	78.3538	40.8443	74.1283	85.1467	20.255
C107811_c0_seq1_	TPA exp: claudin 29a2 [Salmo salar]	56.8476	1.61067	0.773856	2.08136	0.0374013	1	11.6776	46.6156	109.696	14.4641	50.9124	107.72
C129150_c0_seq1_	PREDICTED: rhomboid-related protein 3-like [Oreochromis niloticus]	281.548	1.15283	0.553888	2.08135	0.0374023	1	171.98	243.988	283.576	247.697	301.963	440.086
C3379_c0_seq1_	novel protein similar to human non-muscle myosin, heavy polypeptide 10 (MYH10) [Danio rerio]	645.626	1.12817	0.542109	2.08107	0.0374271	1	380.053	730.972	575.321	536.074	704.874	946.461
C30633_c2_seq1_	unnamed protein product [Tetraodon nigroviridis]	1265.98	1.29747	0.623491	2.08098	0.0374358	1	687.918	1386.57	1569.59	767.499	1062.14	2122.17
C11014_c0_seq1_	PREDICTED: heterogeneous nuclear ribonucleoprotein A3 homolog 2-like [Oreochromis niloticus]	13.7583	-1.59796	0.768054	-2.08054	0.0374764	1	35.0329	19.8364	3.50094	13.5601	8.77801	1.84136
C89158_c0_seq1_	PREDICTED: crossover junction endonuclease MUS81-like [Oreochromis niloticus]	114.558	1.61501	0.776367	2.08021	0.0375063	1	3.18481	155.716	113.197	197.977	75.4909	141.785
C86455_c0_seq1_	PREDICTED: UPF0672 protein C3orf58 homolog [Oreochromis niloticus]	104.118	1.23532	0.593851	2.08019	0.0375084	1	58.3881	94.223	105.028	102.152	99.1915	165.723
C10498_c1_seq1_	PREDICTED: TAF5-like RNA polymerase II p300/CBP-associated factor-associated factor 65 kDa subunit 5L-like [Oreochromis niloticus]	50.0355	-1.42612	0.685663	-2.07991	0.0375334	1	79.6201	53.5583	36.1764	60.5682	50.0346	20.255
C9648_c2_seq1_	NEDD8-conjugating enzyme Ubc12 [Salmo salar] gb	129.911	1.28834	0.619678	2.07904	0.0376136	1	53.0801	128.937	155.208	122.944	154.493	164.802
C197785_c0_seq1_	PREDICTED: hypothetical protein LOC100497520 [Xenopus (Silurana) tropicalis]	54.6873	1.51396	0.728403	2.07846	0.0376666	1	18.0472	35.7056	84.0226	62.3762	37.7454	90.2268
C24205_c1_seq1_	TNF superfamily member 10-like protein [Oncorhynchus mykiss] gb	21.9894	1.6052	0.772384	2.07824	0.037687	1	2.1232	27.771	21.0057	19.8881	29.8452	31.3032
C2710_c1_seq1_	hypothetical protein PANDA 009663 [Ailuropoda melanoleuca]	24.8774	-1.60993	0.774894	-2.07761	0.0377448	1	54.1417	19.8364	4.66792	37.9681	28.9674	3.68273
C159510_c0_seq1_	PREDICTED: protein spire homolog 1-like [Danio rerio]	526.267	1.13484	0.54627	2.07744	0.0377612	1	318.481	504.837	471.46	446.578	617.094	799.152
C18340_c0_seq1_	PREDICTED: F-box only protein 43-like [Oreochromis niloticus]	1131.68	1.09082	0.525116	2.07729	0.0377747	1	658.193	1246.72	1284.85	1059.49	966.459	1574.37
C36457_c0_seq1_	PREDICTED: PH and SEC7 domain-containing protein 4-like [Oreochromis niloticus]	6.72364	-1.14431	0.551042	-2.07663	0.037836	1	35.0329	0	3.50094	1.80801	0	0
C33244_c0_seq1_	PREDICTED: serine/threonine-protein kinase LMTK2 [Oreochromis niloticus]	302.471	-1.31419	0.632983	-2.07619	0.0378768	1	469.228	228.119	246.233	445.674	278.263	147.309
C45338_c0_seq1_	Sorting nexin-24 [Osmerus mordax]	29.2164	-1.6108	0.775879	-2.0761	0.0378845	1	88.113	13.8855	12.8368	40.6802	9.65581	10.1275
C1010_c11_seq1_	PREDICTED: polyadenylate-binding protein 1-like [Oreochromis niloticus]	729.526	-1.08205	0.521347	-2.0755	0.0379404	1	1044.62	756.759	603.329	776.539	754.909	441.006
C114661_c0_seq1_	PREDICTED: prenylcysteine oxidase-like [Oreochromis niloticus]	25.635	1.61085	0.776155	2.07542	0.0379478	1	9.55442	26.7792	18.6717	10.848	8.77801	79.1786
C26100_c1_seq1_	Zgc:152774 protein [Danio rerio]	4.67702	1.26576	0.609995	2.07503	0.0379836	1	1.0616	0.991821	1.16698	0.904003	0	23.9377
C31093_c3_seq1_	PREDICTED: trafficking protein particle complex subunit 8-like [Danio rerio]	341.251	-1.25537	0.60516	-2.07445	0.0380378	1	535.047	389.786	229.895	404.09	305.475	183.216
C58273_c0_seq1_	PREDICTED: engulfment and cell motility protein 2 [Oreochromis niloticus]	23.0991	-1.60213	0.772951	-2.07275	0.0381959	1	43.5257	28.7628	9.33585	19.8881	32.4786	4.60341
C133046_c0_seq1_	DNA excision repair protein ERCC-1 [Salmo salar] gb	48.4566	-1.60861	0.776265	-2.07225	0.0382422	1	99.7906	57.5256	5.8349	57.8562	61.4461	8.28613
C59389_c0_seq1_	Krueppel-like factor 2 [Salmo salar] gb	33.8438	-1.53209	0.739384	-2.07212	0.038254	1	59.4497	29.7546	19.8387	46.1042	36.8676	11.0482
C87975_c0_seq1_	zona pellucida glycoprotein AX [Acipenser sinensis]	18.4694	1.59277	0.768786	2.07179	0.0382846	1	1.0616	11.9019	5.8349	23.5041	29.8452	38.6686
C144772_c0_seq1_	PREDICTED: fer-1-like protein 6-like [Danio rerio]	12.6589	-1.40412	0.677956	-2.07111	0.0383489	1	46.7105	0.991821	1.16698	24.4081	1.7556	0.920682
C3645_c0_seq1_	Trifunctional enzyme subunit beta, mitochondrial precursor [Salmo salar]	413.229	-1.46088	0.705425	-2.07092	0.0383661	1	702.78	333.252	224.06	732.243	320.397	166.643
C27563_c0_seq1_	PREDICTED: WD repeat domain phosphoinositide-interacting protein 2-like [Oreochromis niloticus]	64.9199	1.60756	0.776305	2.07078	0.0383795	1	2.1232	49.591	122.533	83.1683	47.4012	84.7027
C26800_c0_seq1_	PREDICTED: THO complex subunit 2 [Oreochromis niloticus]	931.615	1.08248	0.522774	2.07064	0.0383923	1	580.696	909.5	1058.45	798.235	866.389	1376.42
C103461_c0_seq1_	PREDICTED: hypothetical protein LOC100708285 [Oreochromis niloticus]	1174.07	1.11689	0.539454	2.07041	0.0384136	1	657.132	1293.33	1253.34	918.468	1301.78	1620.4
C24326_c0_seq1_	PREDICTED: probable ATP-dependent RNA helicase DDX10 [Danio rerio]	31.2071	1.50885	0.728946	2.0699	0.0384616	1	1.0616	0.991821	56.0151	12.656	27.2118	89.3061
C243034_c0_seq1_	F-box only protein 36 [Oreochromis mossambicus]	7.21425	1.48914	0.719431	2.06988	0.0384635	1	1.0616	1.98364	8.16886	3.61601	1.7556	26.6998
C21077_c0_seq1_	Acyl-protein thioesterase 1 [Salmo salar] gb	44.1767	1.6066	0.776249	2.0697	0.0384803	1	4.24641	15.8691	86.3566	24.4081	61.4461	72.7338
C206_c0_seq1_	MHC class I heavy chain [Oncorhynchus mykiss]	125.342	-1.60607	0.776138	-2.06931	0.0385168	1	211.259	84.3048	21.0057	283.857	137.815	13.8102
C86087_c0_seq1_	PREDICTED: SH2B adapter protein 1-like [Oreochromis niloticus]	41.164	1.59135	0.769035	2.06928	0.03852	1	2.1232	48.5992	53.6811	5.42402	57.057	80.0993
C10988_c2_seq1_	Pc protein [Danio rerio]	248.502	-1.29706	0.626892	-2.06903	0.0385434	1	375.807	281.677	164.544	324.537	223.839	120.609
C148136_c0_seq1_	V-set and transmembrane domain-containing protein 2 [Dicentrarchus labrax]	8.39782	1.51912	0.734451	2.06837	0.0386053	1	1.0616	8.92639	1.16698	5.42402	5.2668	28.5411
C417_c0_seq1_	60S ribosomal protein L10 [Salmo salar] gb	276.626	-1.60516	0.776246	-2.06785	0.0386543	1	593.435	115.051	66.5179	679.811	139.57	65.3684
C16498_c0_seq1_	ubiquitin-fold modifier 1 [Salmo salar] sp	76.5262	-1.42464	0.689109	-2.06737	0.0386993	1	104.037	102.158	52.5141	90.4003	84.2689	25.7791
C23648_c2_seq1_	PREDICTED: membrane-bound transcription factor site-1 protease [Oreochromis niloticus]	268.874	1.44455	0.698908	2.06687	0.0387467	1	83.8665	166.626	252.068	287.473	468.746	354.462
C9269_c0_seq1_	Proteasome subunit beta type 8 [Oncorhynchus mykiss] gb	11.4326	1.47425	0.713663	2.06575	0.0388523	1	0	6.94275	18.6717	1.80801	5.2668	35.9066
C78747_c0_seq1_	PREDICTED: u2 small nuclear ribonucleoprotein auxiliary factor 35 kDa subunit-related protein 2 [Danio rerio]	26.6484	-1.59915	0.774265	-2.06538	0.0388872	1	65.8193	9.91821	40.8443	31.6401	6.14461	5.52409
C3185_c6_seq1_	PREDICTED: RNA-binding protein Musashi homolog 1-like [Oreochromis niloticus]	137.506	1.58001	0.765432	2.0642	0.0389986	1	31.8481	157.7	207.723	28.9281	165.904	232.932
C27126_c0_seq1_	PREDICTED: cytosolic 5'-nucleotidase III-like protein-like [Oreochromis niloticus]	93.6862	1.40393	0.680237	2.06388	0.0390289	1	41.4025	85.2966	130.702	56.9522	92.1691	155.595
C111991_c0_seq1_	PREDICTED: regulator of G-protein signaling 14-like [Danio rerio]	28.1209	1.58813	0.769718	2.06326	0.0390882	1	6.36961	12.8937	39.6773	38.8721	18.4338	52.4788
C39142_c0_seq1_	PREDICTED: hypothetical protein LOC100695957 [Oreochromis niloticus]	45.5016	-1.47449	0.714757	-2.06292	0.0391202	1	84.9282	40.6647	35.0094	61.4722	31.6008	19.3343
C50248_c1_seq1_	N-terminal kinase-like-binding protein 1 [Salmo salar]	8.77606	-1.47669	0.7159	-2.06271	0.0391406	1	30.7865	0.991821	4.66792	12.656	2.6334	0.920682
C17105_c0_seq1_	PREDICTED: secernin-3-like [Oreochromis niloticus]	69.2168	-1.44143	0.699152	-2.06168	0.0392381	1	83.8665	61.4929	82.8556	94.0164	73.7353	19.3343
C3533_c0_seq1_	PREDICTED: hypothetical protein LOC100699980 [Oreochromis niloticus]	448.046	1.14102	0.553444	2.06167	0.0392394	1	279.201	467.148	484.297	364.313	386.232	707.083
C368571_c0_seq1_	uncharacterized protein LOC565375 [Danio rerio] gb	19.427	-1.59873	0.775646	-2.06116	0.0392875	1	39.2793	10.91	15.1707	34.3521	13.167	3.68273
C439824_c0_seq1_	PREDICTED: proprotein convertase subtilisin/kexin type 5-like [Oreochromis niloticus]	92.5832	-1.36906	0.664224	-2.06115	0.0392891	1	143.316	109.1	71.1858	122.04	69.3463	40.51
C12066_c0_seq1_	Galectin-3 [Salmo salar] gb	35.5024	-1.58675	0.770066	-2.06053	0.0393475	1	76.4353	28.7628	3.50094	49.7202	50.9124	3.68273
C35716_c0_seq1_	unnamed protein product [Tetraodon nigroviridis]	30.8924	-1.5702	0.762054	-2.06049	0.0393519	1	40.3409	31.7383	25.6736	47.0082	35.9898	4.60341
C27921_c0_seq1_	PREDICTED: nucleolar transcription factor 1-like [Oreochromis niloticus]	408.539	1.07743	0.522976	2.06019	0.0393804	1	236.737	364.99	428.282	404.994	456.456	559.774
C58305_c0_seq1_	PREDICTED: lysosomal alpha-glucosidase-like [Oreochromis niloticus]	6.61437	-1.42321	0.690917	-2.05988	0.0394098	1	26.54	6.94275	3.50094	0.904003	0.877801	0.920682
C54176_c1_seq1_	PREDICTED: 1-phosphatidylinositol-4,5-bisphosphate phosphodiesterase eta-2-like, partial [Danio rerio]	17.6846	-1.54448	0.749845	-2.05973	0.0394248	1	53.0801	28.7628	3.50094	15.3681	2.6334	2.76204
C24755_c0_seq1_	Y-box-binding protein 2-A [Salmo salar] gb	287.673	-1.41552	0.687261	-2.05966	0.0394311	1	586.004	229.111	162.21	384.201	208.917	155.595
C68024_c0_seq1_	PREDICTED: A-kinase anchor protein 9 [Oreochromis niloticus]	61.4908	1.59034	0.772299	2.05922	0.0394728	1	10.616	78.3538	15.1707	101.248	63.2017	100.354
C41863_c0_seq1_	PREDICTED: probable RNA-binding protein EIF1AD-like [Oreochromis niloticus]	91.4654	-1.51804	0.737214	-2.05915	0.0394796	1	182.596	55.542	56.0151	155.489	62.3239	36.8273
C8308_c4_seq1_	novel protein (zgc:101592) [Danio rerio]	14.3462	-1.59711	0.775864	-2.05849	0.0395428	1	26.54	17.8528	17.5047	13.5601	8.77801	1.84136
C83420_c0_seq1_	PREDICTED: snRNA-activating protein complex subunit 2-like [Danio rerio]	1528.06	1.46586	0.712142	2.05837	0.0395542	1	487.275	1874.54	2358.47	610.202	1667.82	2170.05
C1806_c1_seq1_	Ankyrin repeat domain-containing protein 46 [Salmo salar]	29.6678	-1.59625	0.775644	-2.05796	0.0395935	1	83.8665	20.8282	7.00188	28.9281	26.334	11.0482
C88989_c0_seq1_	PREDICTED: u2 small nuclear ribonucleoprotein auxiliary factor 35 kDa subunit-related protein 2 [Danio rerio]	83.5594	1.44053	0.700005	2.05789	0.039601	1	29.7249	70.4193	137.704	78.6483	60.5683	124.292
C15965_c0_seq1_	PREDICTED: LOW QUALITY PROTEIN: CAP-Gly domain-containing linker protein 1-like [Oreochromis niloticus]	717.362	1.09744	0.533292	2.05785	0.0396042	1	393.854	660.553	722.361	687.043	887.457	952.905
C35485_c1_seq1_	B-cell lymphoma 6 protein homolog [Salmo salar] gb	242.471	-1.46189	0.710578	-2.05733	0.0396544	1	359.883	366.974	108.529	312.785	224.717	81.9407
C228130_c1_seq1_	PREDICTED: MORN repeat-containing protein 4-like [Oreochromis niloticus]	19.5094	1.58831	0.772131	2.05705	0.0396814	1	1.0616	14.8773	17.5047	9.04003	37.7454	36.8273
C48918_c0_seq1_	PREDICTED: jmjC domain-containing protein 8-like [Oreochromis niloticus]	41.7631	1.59166	0.773884	2.05672	0.0397131	1	11.6776	19.8364	80.5217	27.1201	18.4338	92.9888
C68203_c0_seq1_	PREDICTED: sec1 family domain-containing protein 2 [Oreochromis niloticus]	25.028	1.57706	0.766856	2.05653	0.0397319	1	6.36961	18.8446	18.6717	16.2721	42.1344	47.8754
C31115_c2_seq1_	PREDICTED: SCY1-like protein 2 [Oreochromis niloticus]	191.841	1.22387	0.595212	2.05619	0.0397639	1	82.8049	227.127	211.223	214.249	179.949	235.694
C6298_c5_seq1_	PREDICTED: hypothetical protein LOC100707962 [Oreochromis niloticus]	18.5742	-1.57631	0.76674	-2.05585	0.0397966	1	39.2793	16.861	10.5028	22.6001	16.6782	5.52409
C68918_c0_seq1_	PREDICTED: trophoblast glycoprotein-like [Oreochromis niloticus]	10.5984	-1.5802	0.768668	-2.05577	0.0398049	1	32.9097	4.9591	7.00188	5.42402	10.5336	2.76204
C74501_c0_seq1_	mediator of RNA polymerase II transcription subunit 20 [Salmo salar] gb	37.4825	-1.57747	0.767453	-2.05547	0.0398341	1	77.4969	31.7383	11.6698	56.9522	35.9898	11.0482
C42374_c0_seq1_	PREDICTED: serine/threonine-protein kinase/endoribonuclease IRE1-like [Oreochromis niloticus]	784.827	1.1797	0.574107	2.05485	0.0398937	1	406.594	776.596	1011.77	588.506	840.933	1084.56
C22234_c0_seq1_	PREDICTED: monocarboxylate transporter 6-like [Danio rerio]	164.004	1.42278	0.692444	2.05472	0.0399064	1	76.4353	185.47	210.057	77.7443	136.937	297.38
C43640_c0_seq1_	PREDICTED: probable helicase with zinc finger domain-like [Oreochromis niloticus]	36.2023	-1.56013	0.759295	-2.05471	0.0399073	1	65.8193	23.8037	58.349	40.6802	18.4338	10.1275
C21063_c0_seq1_	PREDICTED: zinc finger protein 470-like [Monodelphis domestica]	90.5169	-1.31312	0.639106	-2.05462	0.0399158	1	147.563	98.1903	66.5179	106.672	78.1243	46.0341
C24911_c2_seq1_	PREDICTED: ubiquitin carboxyl-terminal hydrolase 34, partial [Oreochromis niloticus]	1211.33	-1.01342	0.493318	-2.05429	0.0399478	1	1769.69	1179.27	1152.98	1251.14	1113.93	800.993
C81708_c1_seq1_	telomerase reverse transcriptase [Epinephelus coioides]	39.1712	-1.52063	0.740227	-2.05427	0.0399496	1	72.1889	22.8119	28.0075	56.9522	41.2566	13.8102
C41023_c1_seq1_	Uncharacterized protein [Dicentrarchus labrax]	137.101	1.21781	0.592846	2.05417	0.0399593	1	63.6961	139.847	147.04	127.464	165.027	179.533
C17954_c0_seq1_	PREDICTED: retinol dehydrogenase 10-A-like isoform 1 [Oreochromis niloticus]	89.3136	1.49401	0.727392	2.05392	0.039983	1	40.3409	83.313	101.527	34.3521	91.2913	185.057
C253262_c0_seq1_	PREDICTED: DNA polymerase sigma-like [Oreochromis niloticus]	187.867	1.25325	0.610213	2.05379	0.039996	1	114.653	185.47	187.884	134.697	170.293	334.207
C35639_c0_seq1_	PREDICTED: nucleolysin TIA-1 isoform p40 [Oreochromis niloticus]	164.412	1.19414	0.581507	2.05353	0.0400216	1	88.113	157.7	186.717	131.985	182.583	239.377
C13754_c0_seq1_	Serine/threonine-protein kinase MST4 [Salmo salar]	436.563	1.23601	0.601933	2.05341	0.0400331	1	217.628	352.096	512.305	339.001	573.204	625.143
C338_c326_seq1_	probable tubulin polyglutamylase ttll9 [Ictalurus furcatus]	23.9423	-1.53814	0.749074	-2.05339	0.0400346	1	39.2793	21.8201	19.8387	33.4481	22.8228	6.44477
C13420_c0_seq1_	PREDICTED: intersectin-1-like isoform 4 [Rattus norvegicus] ref	76.1507	1.38752	0.675803	2.05315	0.0400584	1	26.54	58.5174	100.36	89.4963	81.6355	100.354
C65559_c0_seq1_	PREDICTED: tRNA-dihydrouridine synthase 2-like [Oreochromis niloticus]	740.268	1.21325	0.591243	2.05203	0.0401666	1	393.854	651.626	1011.77	549.634	739.108	1095.61
C159282_c0_seq1_	PREDICTED: sickle tail protein homolog [Danio rerio]	77.5448	1.52152	0.741513	2.05192	0.0401775	1	20.1704	101.166	126.034	37.0641	67.5907	113.244
C49114_c0_seq1_	Alpha-methylacyl-CoA racemase [Osmerus mordax]	108.359	-1.5925	0.7763	-2.05139	0.0402286	1	226.121	117.035	10.5028	168.145	105.336	23.017
C37180_c0_seq1_	PREDICTED: zinc finger CCCH domain-containing protein 7B-like [Oreochromis niloticus]	139.401	-1.27998	0.624045	-2.0511	0.0402575	1	216.567	144.806	92.1915	162.721	149.226	70.8925
C60348_c0_seq1_	ubiquitin-protein ligase E3A [Danio rerio] gb	163.601	1.57803	0.769552	2.05058	0.0403075	1	54.1417	189.438	25.6736	122.04	222.961	367.352
C83430_c0_seq1_	twisted gastrulation precursor [Osmerus mordax]	15.2994	-1.46098	0.712524	-2.05043	0.0403222	1	52.0185	13.8855	0	13.5601	11.4114	0.920682
C184540_c1_seq1_	uncharacterized protein LOC379242 [Xenopus laevis] gb	35.7411	-1.51216	0.737502	-2.05038	0.0403277	1	87.0514	12.8937	4.66792	93.1124	15.8004	0.920682
C25676_c0_seq1_	Mediator of RNA polymerase II transcription subunit 8 [Anoplopoma fimbria]	21.3528	1.56474	0.763194	2.05026	0.0403393	1	5.30801	30.7464	22.1726	17.1761	14.0448	38.6686
C9714_c1_seq1_	PREDICTED: DENN domain-containing protein 2D-like [Oreochromis niloticus]	66.586	-1.37909	0.672818	-2.04972	0.0403914	1	100.852	88.2721	71.1858	64.1842	47.4012	27.6204
C57869_c0_seq1_	PREDICTED: LOW QUALITY PROTEIN: serine/threonine-protein kinase 10-like [Oreochromis niloticus]	796.041	1.20953	0.590101	2.0497	0.0403933	1	468.166	792.465	602.162	619.242	1001.57	1292.64
C61513_c1_seq1_	PREDICTED: outer dense fiber protein 3-like protein 2-like [Oreochromis niloticus]	7.83737	1.22256	0.596844	2.04838	0.0405228	1	0	0	9.33585	0.904003	0.877801	35.9066
C8184_c4_seq1_	novel protein (zgc:158432) [Danio rerio]	135.798	-1.55159	0.757566	-2.04813	0.0405476	1	193.212	135.879	54.8481	282.049	120.259	28.5411
C92722_c0_seq1_	PREDICTED: Dmx-like 2 isoform 1 [Equus caballus]	497.819	1.23559	0.603314	2.04801	0.0405591	1	220.813	614.929	394.439	467.37	651.328	638.032
C177252_c0_seq1_	centrosomal protein of 290 kDa [Danio rerio]	4.31091	1.31131	0.640458	2.04746	0.0406127	1	0	0.991821	1.16698	0.904003	4.389	18.4136
C3971_c4_seq1_	Guanine nucleotide exchange factor MSS4 [Osmerus mordax]	21.5918	-1.57389	0.768935	-2.04684	0.0406739	1	55.2033	31.7383	2.33396	20.7921	15.8004	3.68273
C61351_c0_seq1_	RecName: Full=Delta-like protein D; Short=DeltaD; AltName: Full=After eight protein; Flags: Precursor emb	154.754	-1.50679	0.7363	-2.04643	0.0407137	1	279.201	165.634	46.6792	207.921	172.927	56.1616
C161756_c0_seq1_	PREDICTED: solute carrier family 35 member F2-like [Oreochromis niloticus]	1554.6	1.23338	0.602823	2.04601	0.0407556	1	874.76	1213.99	2147.24	1178.82	1415.89	2496.89
C43206_c2_seq1_	Nucleotide-binding protein 2 [Esox lucius]	13.8714	1.58681	0.775629	2.04584	0.0407722	1	2.1232	7.93457	11.6698	18.0801	15.8004	27.6204
C22416_c0_seq1_	phosphomannomutase 2 [Salmo salar] gb	19.6512	-1.58474	0.774633	-2.0458	0.0407764	1	54.1417	18.8446	8.16886	14.4641	14.9226	7.36545
C4052_c9_seq1_	PREDICTED: hypothetical protein LOC100001114 [Danio rerio]	48.8822	1.5821	0.773405	2.04563	0.0407927	1	8.49282	64.4684	16.3377	31.6401	90.4135	81.9407
C56718_c0_seq1_	Nuclear RNA export factor 1 [Salmo salar] gb	23.88	-1.58369	0.77422	-2.04553	0.0408024	1	40.3409	10.91	19.8387	31.6401	36.8676	3.68273
C67305_c0_seq1_	PREDICTED: TBC1 domain family member 16 [Oreochromis niloticus]	68.2069	-1.42999	0.699433	-2.0445	0.040904	1	150.747	52.5665	54.8481	62.3762	50.0346	38.6686
C17890_c0_seq1_	Translation machinery-associated protein 20 [Oncorhynchus mykiss] gb	36.6036	-1.58615	0.775902	-2.04427	0.0409267	1	104.037	18.8446	5.8349	28.0241	50.9124	11.9689
C144498_c0_seq1_	PREDICTED: hypothetical protein LOC100691851 [Oreochromis niloticus]	119.632	1.34216	0.656572	2.04419	0.0409348	1	48.8337	111.084	119.032	92.2084	179.071	167.564
C344_c0_seq1_	60S ribosomal protein L27a [Salmo salar] gb	295.538	-1.50271	0.735169	-2.04403	0.0409503	1	439.503	308.456	101.527	478.218	359.898	85.6234
C47309_c0_seq1_	PX domain-containing protein kinase-like protein [Danio rerio] emb	44.614	-1.55714	0.761925	-2.0437	0.0409836	1	88.113	39.6728	15.1707	71.4163	39.501	13.8102
C4786_c2_seq1_	glutathione peroxidase 4b [Salmo salar]	820.431	-1.31481	0.643401	-2.04354	0.0409993	1	967.119	1020.58	583.49	973.612	1084.08	293.697
C1630_c2_seq1_	PREDICTED: perilipin-1 [Danio rerio]	26.4888	-1.56222	0.764472	-2.04352	0.0410007	1	60.5113	12.8937	4.66792	59.6642	18.4338	2.76204
C40290_c2_seq1_	PREDICTED: importin-13-like [Oreochromis niloticus]	13.3621	-1.57453	0.770536	-2.04343	0.0410103	1	27.6016	10.91	9.33585	23.5041	7.90021	0.920682
C36933_c0_seq1_	PREDICTED: histone-lysine N-methyltransferase MLL3 [Oreochromis niloticus]	119.505	-1.49804	0.733105	-2.04342	0.0410112	1	214.444	61.4929	214.724	76.8403	105.336	44.1927
C8963_c1_seq1_	redox-regulatory protein FAM213A [Danio rerio] sp	73.1527	-1.46222	0.715599	-2.04335	0.041018	1	94.4826	54.5501	64.1839	92.2084	113.236	20.255
C275879_c0_seq1_	PREDICTED: delta-like protein A-like [Oreochromis niloticus]	19.8	1.58334	0.775089	2.04279	0.0410737	1	6.36961	16.861	24.5066	8.13603	12.2892	50.6375
C15017_c6_seq1_	RecName: Full=Large proline-rich protein BAG6; AltName: Full=BCL2-associated athanogene 6; AltName: Full=HLA-B-associated transcript 3 emb	2720.82	-1.08782	0.532699	-2.04209	0.0411421	1	3819.64	2699.74	2206.76	3363.8	2641.3	1593.7
C20950_c0_seq1_	FUN14 domain-containing protein 1 [Salmo salar]	42.4312	-1.53871	0.753563	-2.04191	0.0411603	1	76.4353	64.4684	21.0057	27.1201	52.668	12.8895
C2834_c12_seq1_	AT-rich interactive domain-containing protein 3A [Danio rerio] sp	5.44733	-1.29803	0.635701	-2.04188	0.0411632	1	25.4784	0.991821	0	0.904003	4.389	0.920682
C24598_c4_seq1_	PREDICTED: protocadherin-23-like [Oreochromis niloticus]	7.36863	1.30485	0.639087	2.04174	0.0411775	1	1.0616	0.991821	0	8.13603	0.877801	33.1445
C91928_c0_seq1_	PREDICTED: UPF0488 protein C8orf33 homolog [Oreochromis niloticus]	516.151	1.12853	0.552782	2.04155	0.0411966	1	306.803	542.526	612.665	414.034	451.19	769.69
C125834_c0_seq1_	novel protein containing a lectin C-type domain [Danio rerio] emb	31.9279	1.49417	0.731945	2.04137	0.0412139	1	3.18481	6.94275	59.516	26.2161	0.877801	94.8302
C100044_c1_seq1_	PREDICTED: receptor-interacting serine/threonine-protein kinase 4-like [Oreochromis niloticus]	83.6507	-1.461	0.715821	-2.04101	0.0412496	1	134.823	94.223	39.6773	122.04	80.7577	30.3825
C119991_c0_seq1_	PREDICTED: gamma-aminobutyric acid (GABA) A receptor, alpha 1 [Taeniopygia guttata]	27.5303	1.58132	0.774875	2.04074	0.0412765	1	5.30801	34.7137	40.8443	8.13603	23.7006	52.4788
C24660_c0_seq1_	PREDICTED: nucleosome assembly protein 1-like 4-like [Oreochromis niloticus]	495.593	1.27169	0.623259	2.04039	0.0413111	1	277.078	476.074	659.344	395.954	330.053	835.058
C98352_c0_seq1_	PREDICTED: solute carrier organic anion transporter family member 4A1 [Danio rerio]	585.364	-1.52434	0.747126	-2.04028	0.0413228	1	1153.96	336.227	336.09	1178.82	287.041	220.043
C50756_c1_seq1_	Hpse protein [Danio rerio]	18.0765	1.5759	0.772576	2.0398	0.0413701	1	1.0616	23.8037	5.8349	23.5041	20.1894	34.0652
C48709_c0_seq1_	si:dkey-189g17.2 [Danio rerio] emb	340.309	-1.24219	0.609224	-2.03897	0.0414529	1	472.413	390.777	241.565	452.906	322.153	162.04
C17411_c0_seq1_	GTP-binding protein [Oncorhynchus tshawytscha]	52.64	-1.55707	0.763856	-2.03844	0.041506	1	85.9898	79.3457	16.3377	66.8963	55.3014	11.9689
C192368_c0_seq1_	PREDICTED: GREB1-like protein [Oreochromis niloticus]	58.3521	1.56607	0.768457	2.03794	0.041556	1	16.9856	81.3293	60.683	12.656	59.6905	118.768
C3388_c1_seq1_	ribosomal protein L3-like [Salmo salar] gb	12.6581	-1.54626	0.75874	-2.03793	0.0415565	1	35.0329	5.95093	3.50094	22.6001	7.02241	1.84136
C97749_c0_seq1_	PREDICTED: DENN domain-containing protein 2A-like [Oreochromis niloticus]	899.215	-1.35752	0.666334	-2.0373	0.0416199	1	1426.79	794.448	514.638	1451.83	798.799	408.783
C83945_c1_seq1_	PREDICTED: neuralized-like protein 4-like [Oreochromis niloticus]	194.58	-1.31174	0.643948	-2.03703	0.0416467	1	322.727	171.585	120.199	261.257	191.361	100.354
C20757_c6_seq1_	BTB/POZ domain-containing protein 7 [Danio rerio] emb	26.1401	1.57607	0.773739	2.03696	0.0416542	1	2.1232	56.5338	14.0038	10.848	25.4562	47.8754
C194579_c0_seq1_	unnamed protein product [Tetraodon nigroviridis]	26.1023	-1.56407	0.768013	-2.03651	0.0416994	1	40.3409	34.7137	12.8368	31.6401	32.4786	4.60341
C34705_c0_seq1_	PREDICTED: endophilin-A1-like [Oreochromis niloticus]	196.091	-1.41445	0.694566	-2.03645	0.0417048	1	356.698	202.331	82.8556	248.601	193.994	92.0682
C54010_c0_seq1_	PREDICTED: uncharacterized protein C1orf14-like [Ailuropoda melanoleuca]	75.9356	-1.27409	0.625836	-2.03582	0.0417685	1	128.454	76.3702	72.3528	61.4722	74.6131	42.3513
C1619_c1_seq1_	ribonuclease Ok2 [Oncorhynchus keta]	378.628	1.37215	0.674055	2.03567	0.0417834	1	200.643	222.168	546.147	286.569	305.475	710.766
C25667_c0_seq1_	PREDICTED: ras-associated and pleckstrin homology domains-containing protein 1-like [Oreochromis niloticus]	367.962	-1.10094	0.540935	-2.03526	0.0418244	1	583.881	336.227	316.252	390.529	340.587	240.298
C60530_c0_seq1_	PREDICTED: dual specificity protein phosphatase 16 [Oreochromis niloticus]	16.8334	-1.57928	0.776189	-2.03465	0.0418857	1	42.4641	9.91821	8.16886	25.3121	10.5336	4.60341
C72376_c0_seq1_	PREDICTED: ARF GTPase-activating protein GIT1-like [Oreochromis niloticus]	16.9353	-1.52795	0.751022	-2.03449	0.0419023	1	39.2793	15.8691	7.00188	28.9281	10.5336	0
C41398_c1_seq1_	PREDICTED: histone acetyltransferase p300-like [Oreochromis niloticus]	234.551	-1.31454	0.646267	-2.03406	0.0419459	1	459.674	168.61	194.886	267.585	172.927	143.626
C18112_c0_seq1_	unnamed protein product [Tetraodon nigroviridis]	23.3488	1.56026	0.767114	2.03394	0.0419575	1	3.18481	19.8364	35.0094	23.5041	26.334	32.2239
C5631_c0_seq1_	Phosphatidylinositol-5-phosphate 4-kinase type-2 beta [Salmo salar] gb	657.628	1.16416	0.572391	2.03385	0.0419665	1	403.409	695.266	636.004	450.194	704.874	1056.02
C23915_c1_seq1_	PREDICTED: sn1-specific diacylglycerol lipase alpha-like [Oreochromis niloticus]	627.523	1.14822	0.564586	2.03374	0.0419775	1	348.205	717.086	688.519	446.578	668.006	896.744
C45885_c0_seq1_	PREDICTED: leucine-rich repeat and immunoglobulin-like domain-containing nogo receptor-interacting protein 1-like [Oreochromis niloticus]	440.636	-1.57742	0.775656	-2.03366	0.0419861	1	701.719	655.594	50.1802	575.85	596.027	64.4477
C32161_c1_seq1_	tRNA-splicing ligase RtcB homolog [Danio rerio] sp	50.1472	-1.45838	0.717246	-2.03331	0.0420216	1	75.3737	55.542	36.1764	76.8403	40.3788	16.5723
C25265_c0_seq1_	PREDICTED: hypothetical protein LOC100089834 [Ornithorhynchus anatinus]	184.725	1.39474	0.685964	2.03325	0.0420268	1	80.6817	132.904	268.406	103.96	218.572	303.825
C85240_c0_seq1_	axin1 [Danio rerio]	73.5585	1.55878	0.766786	2.03287	0.0420652	1	1.0616	40.6647	61.85	33.4481	178.194	126.133
C16565_c0_seq1_	Vesicle-trafficking protein SEC22b-B [Salmo salar] gb	81.0986	-1.5036	0.739777	-2.03251	0.0421024	1	92.3594	135.879	59.516	81.3603	101.825	15.6516
C70607_c0_seq1_	PREDICTED: hypothetical protein LOC553374, partial [Danio rerio]	588.129	1.06563	0.524312	2.03244	0.0421091	1	364.129	570.297	652.342	609.298	480.157	852.551
C194844_c0_seq1_	PREDICTED: opsin-3-like [Danio rerio]	644.142	1.01233	0.498135	2.03224	0.042129	1	394.916	613.937	624.335	633.706	723.308	874.647
C78732_c0_seq1_	PREDICTED: protein Hook homolog 3 [Nomascus leucogenys]	110.308	1.27109	0.625474	2.0322	0.0421338	1	64.7577	108.108	110.863	103.056	79.8799	195.184
C51682_c1_seq1_	hypothetical protein PANDA 011018 [Ailuropoda melanoleuca]	126.497	-1.50617	0.741221	-2.03201	0.042153	1	218.69	130.92	43.1783	209.729	114.114	42.3513
C101848_c0_seq1_	PREDICTED: fer-1-like protein 4-like [Danio rerio]	235.616	1.44215	0.709852	2.03162	0.0421918	1	62.6345	256.882	416.612	152.777	244.906	279.887
C13245_c1_seq1_	epithelial membrane protein 2 [Oncorhynchus mykiss] gb	582.938	-1.40539	0.691937	-2.0311	0.042245	1	1049.92	420.532	301.081	932.028	518.78	275.284
C126613_c0_seq1_	PREDICTED: vang-like protein 1-like [Oreochromis niloticus]	38.8802	1.57536	0.776098	2.02985	0.0423722	1	1.0616	68.4356	30.3415	38.8721	43.0122	51.5582
C12291_c1_seq1_	PREDICTED: dedicator of cytokinesis protein 5 [Oreochromis niloticus]	864.991	1.04497	0.51481	2.02982	0.0423746	1	560.526	949.173	871.735	738.571	786.509	1283.43
C23931_c0_seq1_	Mitofusin-1 [Salmo salar]	22.8296	1.53462	0.756357	2.02896	0.0424625	1	6.36961	16.861	31.5085	16.2721	25.4562	40.51
C187119_c0_seq1_	protein FAM188B isoform 1 [Mus musculus] sp	101.594	1.35415	0.667469	2.02879	0.0424797	1	50.9569	99.1821	134.203	64.1842	84.2689	176.771
C24319_c3_seq1_	Ester hydrolase C11orf54 homolog [Salmo salar] gb	58.0777	1.55029	0.764192	2.02867	0.0424922	1	6.36961	64.4684	44.3453	72.3203	97.4359	63.527
C169740_c0_seq1_	PREDICTED: UDP-N-acetyl-alpha-D-galactosamine:polypeptide N-acetylgalactosaminyltransferase-like 4b [Danio rerio]	28.5637	-1.57323	0.776224	-2.02677	0.0426863	1	40.3409	26.7792	56.0151	26.2161	20.1894	1.84136
C2055_c0_seq1_	brain creatine kinase b [Oncorhynchus mykiss] gb	477.95	-1.53646	0.758166	-2.02655	0.0427088	1	636.961	636.749	126.034	736.763	637.283	93.9095
C14283_c1_seq1_	Probable palmitoyltransferase ZDHHC13 [Salmo salar] gb	317.442	-1.264	0.623772	-2.02638	0.0427256	1	463.92	399.704	196.053	316.401	374.821	153.754
C109866_c0_seq1_	PREDICTED: abhydrolase domain-containing protein 3-like [Oreochromis niloticus]	4.93031	1.20651	0.595613	2.02566	0.0427993	1	0	0	1.16698	4.52002	0.877801	23.017
C5214_c2_seq1_	type II inositol-3,4-bisphosphate 4-phosphatase [Danio rerio] emb	121.156	-1.2045	0.594669	-2.02549	0.0428171	1	183.657	135.879	93.3585	128.368	119.381	66.2891
C72437_c0_seq1_	solute carrier family 25 member 35 [Danio rerio] sp	23.3362	1.52932	0.755104	2.02531	0.042836	1	5.30801	22.8119	35.0094	20.7921	20.1894	35.9066
C3837_c1_seq1_	PREDICTED: desmoplakin [Oreochromis niloticus]	539.969	1.25506	0.619729	2.02517	0.0428496	1	296.187	371.933	758.537	454.714	481.035	877.409
C63312_c0_seq1_	PREDICTED: dual specificity mitogen-activated protein kinase kinase 1-like [Sus scrofa]	14.2506	1.49513	0.738302	2.02509	0.0428581	1	0	4.9591	12.8368	5.42402	25.4562	36.8273
C75859_c0_seq1_	PREDICTED: protein NLRC3-like [Oreochromis niloticus]	472.454	1.28923	0.636686	2.02491	0.0428765	1	208.074	407.638	362.931	444.77	755.786	655.525
C78814_c0_seq1_	PREDICTED: cyclin-G-associated kinase-like isoform 2 [Danio rerio]	64.2511	-1.36112	0.672351	-2.02441	0.0429277	1	125.269	62.4847	52.5141	47.0082	62.3239	35.9066
C11758_c2_seq1_	Abhydrolase domain-containing protein 14B [Salmo salar] gb	35.8385	-1.5161	0.749303	-2.02335	0.043037	1	83.8665	36.6974	2.33396	57.8562	33.3564	0.920682
C29427_c0_seq1_	Mediator of RNA polymerase II transcription subunit 31 [Salmo salar] gb	133.599	-1.49214	0.737617	-2.02291	0.043082	1	229.306	127.945	43.1783	198.881	156.249	46.0341
C2126_c3_seq1_	PREDICTED: HEAT repeat-containing protein 7A [Oreochromis niloticus]	1442.76	1.50377	0.743561	2.02238	0.0431368	1	277.078	1965.79	763.205	1166.16	2852.85	1631.45
C46577_c0_seq1_	Beta-Ala-His dipeptidase [Salmo salar] gb	77.2295	1.54074	0.761854	2.02236	0.0431396	1	27.6016	64.4684	112.03	18.9841	75.4909	164.802
C43932_c0_seq1_	PREDICTED: FH1/FH2 domain-containing protein 3 [Danio rerio]	144.798	1.40627	0.6956	2.02166	0.0432117	1	53.0801	209.274	93.3585	100.344	201.894	210.836
C9056_c0_seq1_	SS18-like protein 2 [Oncorhynchus mykiss] gb	404.755	-1.45641	0.720586	-2.02114	0.043265	1	669.871	351.105	157.542	696.987	402.033	150.992
C4241_c0_seq1_	Glucose-6-phosphate isomerase [Salmo salar]	7.00686	-1.51709	0.750713	-2.02086	0.0432938	1	21.232	3.96728	3.50094	4.52002	7.90021	0.920682
C43167_c0_seq1_	PREDICTED: casein kinase II subunit alpha-like [Oreochromis niloticus]	1643.13	-1.15113	0.569827	-2.02014	0.0433685	1	2436.38	1868.59	1107.46	1890.27	1615.15	940.937
C42541_c1_seq1_	PREDICTED: histone-lysine N-methyltransferase MLL3 [Oreochromis niloticus]	138.623	-1.18314	0.585687	-2.02008	0.0433751	1	194.273	134.888	157.542	159.105	114.114	71.8132
C41074_c1_seq1_	COMM domain-containing protein 8 [Esox lucius]	25.4716	-1.54735	0.766013	-2.02	0.0433835	1	46.7105	27.771	17.5047	39.7762	21.0672	0
C132655_c0_seq1_	PREDICTED: ATP-dependent DNA helicase Q4-like [Danio rerio]	24.6439	-1.55626	0.770722	-2.01922	0.0434639	1	53.0801	20.8282	9.33585	37.0641	20.1894	7.36545
C5615_c0_seq1_	S100-A14 [Salmo salar] gb	3.81809	-1.31403	0.650851	-2.01895	0.0434929	1	18.0472	0.991821	1.16698	0.904003	0.877801	0.920682
C35612_c2_seq1_	metallophosphoesterase 1 [Ictalurus punctatus] gb	24.9537	1.43495	0.710758	2.01891	0.043497	1	0	19.8364	35.0094	0.904003	17.556	76.4166
C220773_c0_seq1_	forkhead box P2 [Ctenopharyngodon idella]	12.7634	-1.56632	0.775998	-2.01846	0.0435435	1	28.6633	6.94275	10.5028	17.1761	10.5336	2.76204
C117181_c0_seq1_	PREDICTED: monocarboxylate transporter 6-like [Danio rerio]	64.873	-1.56474	0.775224	-2.01844	0.0435452	1	87.0514	80.3375	78.1877	48.8162	93.9247	0.920682
C73235_c1_seq1_	PREDICTED: tetratricopeptide repeat protein 39B-like [Oreochromis niloticus]	23.7282	1.49338	0.740031	2.018	0.0435911	1	1.0616	27.771	17.5047	0.904003	31.6008	63.527
C75181_c0_seq1_	leucine-rich repeat-containing protein 39 [Danio rerio] gb	147.899	-1.56391	0.77499	-2.01797	0.0435944	1	205.951	214.233	28.0075	194.361	227.35	17.4929
C14943_c1_seq1_	novel protein similar to vertebrate ATP-binding cassette, sub-family D (ALD) family [Danio rerio]	170.401	-1.56299	0.774749	-2.01742	0.0436518	1	431.01	86.2884	79.3547	325.441	38.6232	61.6857
C65785_c1_seq1_	hypothetical protein ARALYDRAFT 494121 [Arabidopsis lyrata subsp. lyrata] gb	29.8007	-1.51675	0.751929	-2.01715	0.0436799	1	73.2505	26.7792	1.16698	39.7762	35.9898	1.84136
C25889_c0_seq1_	PREDICTED: F-box only protein 7-like [Oreochromis niloticus]	136.614	-1.17356	0.582324	-2.0153	0.0438731	1	182.596	139.847	144.706	121.136	163.271	68.1304
C48367_c0_seq1_	PREDICTED: E3 ubiquitin-protein ligase RNF19A [Oreochromis niloticus]	4.49742	1.25629	0.623395	2.01523	0.0438803	1	1.0616	0	1.16698	0.904003	1.7556	22.0964
C17598_c0_seq1_	RING-box protein 2 [Oncorhynchus mykiss] gb	48.7684	-1.54597	0.767331	-2.01473	0.0439326	1	85.9898	51.5747	43.1783	84.9763	14.9226	11.9689
C138170_c0_seq1_	PREDICTED: synapsin-3-like [Oreochromis niloticus]	188.206	1.52314	0.756095	2.01448	0.0439591	1	50.9569	231.094	281.242	44.2962	215.061	306.587
C26881_c0_seq1_	PREDICTED: E3 ubiquitin-protein ligase MIB2-like [Oreochromis niloticus]	80.4365	1.4745	0.731985	2.01439	0.0439688	1	22.2936	101.166	70.0188	43.3922	133.426	112.323
C165695_c0_seq1_	PREDICTED: microtubule-associated serine/threonine-protein kinase 3-like [Oreochromis niloticus]	109.266	-1.33382	0.662224	-2.01416	0.0439931	1	143.316	114.059	79.3547	122.944	154.493	41.4307
C10051_c0_seq1_	Vesicle-associated membrane protein 8 [Salmo salar]	813.229	1.453	0.72163	2.01349	0.0440626	1	368.376	694.275	1085.29	253.121	889.212	1589.1
C156716_c0_seq1_	PREDICTED: poly(A) RNA polymerase, mitochondrial-like [Oreochromis niloticus]	43.0697	1.39753	0.694462	2.01239	0.0441784	1	14.8624	44.6319	40.8443	57.8562	40.3788	59.8443
C9308_c0_seq1_	microtubule-associated proteins 1A/1B light chain 3A [Salmo salar] gb	980.968	-1.22481	0.608683	-2.01223	0.044196	1	1466.07	1084.06	575.321	1163.45	1084.08	512.82
C316496_c0_seq1_	PREDICTED: galactose-3-O-sulfotransferase 3-like [Anolis carolinensis]	19.6867	-1.53601	0.763485	-2.01184	0.0442369	1	37.1561	14.8773	25.6736	22.6001	12.2892	5.52409
C50176_c2_seq1_	PREDICTED: DNA (cytosine-5)-methyltransferase 3A-like [Oreochromis niloticus]	14.6498	1.35128	0.671859	2.01125	0.0442986	1	2.1232	0.991821	26.8406	0.904003	0.877801	56.1616
C67158_c0_seq1_	PREDICTED: olfactomedin-like protein 2B-like [Oreochromis niloticus]	20.6033	-1.51145	0.752068	-2.00972	0.0444604	1	53.0801	21.8201	1.16698	32.5441	13.167	1.84136
C11708_c3_seq1_	PREDICTED: envoplakin [Oreochromis niloticus]	10.064	-1.46096	0.727172	-2.0091	0.044527	1	28.6633	9.91821	2.33396	5.42402	14.0448	0
C89495_c0_seq1_	uncharacterized protein LOC100304360 [Zea mays] gb	132.619	1.53379	0.763449	2.00903	0.0445339	1	20.1704	208.282	233.396	54.2402	118.503	161.119
C45874_c1_seq1_	PREDICTED: caseinolytic peptidase B protein homolog [Oreochromis niloticus]	78.4537	1.23029	0.612484	2.00869	0.0445697	1	41.4025	79.3457	65.3509	87.6883	77.2465	119.689
C9310_c0_seq1_	PREDICTED: TBC1 domain family member 2B-like [Oreochromis niloticus]	329.036	1.34806	0.671317	2.00809	0.0446339	1	160.302	276.718	168.045	339.001	473.135	557.012
C54348_c0_seq1_	chitinase domain-containing protein 1 [Salmo salar] gb	154.82	1.25426	0.624645	2.00796	0.0446473	1	73.2505	134.888	226.394	137.409	136.937	220.043
C23292_c5_seq1_	PREDICTED: r3H domain-containing protein 1-like [Meleagris gallopavo]	78.1927	-1.54074	0.76733	-2.00792	0.0446521	1	193.212	64.4684	29.1745	120.232	29.8452	32.2239
C153001_c0_seq1_	PREDICTED: protein spire homolog 1-like [Oreochromis niloticus]	108.226	1.342	0.668395	2.00779	0.0446659	1	57.3265	96.2066	73.5198	81.3603	144.837	196.105
C645_c0_seq1_	40S ribosomal protein S9 [Salmo salar] gb	130.241	-1.5583	0.776356	-2.0072	0.0447288	1	225.06	105.133	16.3377	254.025	160.638	20.255
C20406_c1_seq1_	PREDICTED: nucleolar protein 6-like [Oreochromis niloticus]	81.6652	-1.37164	0.68343	-2.00699	0.0447502	1	138.008	85.2966	67.6849	112.096	49.1568	37.7479
C167036_c0_seq1_	PREDICTED: opsin-5-like [Oreochromis niloticus]	49.9923	-1.45545	0.72526	-2.0068	0.0447713	1	66.8809	54.5501	32.6755	73.2243	58.8126	13.8102
C72299_c1_seq1_	PREDICTED: nef-associated protein 1-like [Oreochromis niloticus]	142.904	-1.29549	0.645564	-2.00676	0.0447752	1	184.719	170.593	112.03	131.985	201.016	57.0823
C80830_c0_seq1_	PQ-loop repeat-containing protein 2 [Esox lucius]	414.865	1.43141	0.713583	2.00594	0.0448625	1	128.454	637.741	425.948	178.993	558.281	559.774
C84440_c0_seq1_	PREDICTED: TATA box-binding protein-like protein 1-like [Oreochromis niloticus]	164.242	1.43185	0.713861	2.00579	0.0448792	1	77.4969	109.1	268.406	101.248	109.725	319.476
C23280_c0_seq1_	PREDICTED: ATP-binding cassette sub-family A member 1-like [Oreochromis niloticus]	155.478	-1.30691	0.651663	-2.0055	0.0449091	1	169.856	178.528	159.876	182.609	191.361	50.6375
C41588_c1_seq1_	PREDICTED: glycerol-3-phosphate transporter [Oreochromis niloticus]	10.1424	-1.53685	0.766351	-2.00541	0.0449196	1	27.6016	2.97546	7.00188	12.656	8.77801	1.84136
C96414_c0_seq1_	probable G-protein coupled receptor 146 [Danio rerio] gb	63.7545	1.33036	0.663494	2.00509	0.0449534	1	31.8481	61.4929	45.5122	56.9522	79.0021	107.72
C29485_c0_seq1_	PREDICTED: eukaryotic translation initiation factor 2-alpha kinase 1-like [Oreochromis niloticus]	248.025	1.55559	0.775902	2.00488	0.0449764	1	73.2505	75.3784	584.657	94.0164	98.3137	562.536
C125789_c0_seq1_	PREDICTED: tRNA dimethylallyltransferase, mitochondrial-like [Oreochromis niloticus]	32.5501	-1.54085	0.768552	-2.00487	0.0449765	1	72.1889	20.8282	11.6698	49.7202	29.8452	11.0482
C12489_c0_seq1_	splicing factor, proline- and glutamine-rich [Salmo salar] gb	1021.28	1.00234	0.499975	2.00477	0.0449872	1	579.635	1000.75	1054.95	1054.97	1161.33	1276.06
C10191_c1_seq1_	RecName: Full=Huntingtin; AltName: Full=Huntington disease protein homolog; Short=HD protein homolog emb	31.2535	1.5392	0.767852	2.00455	0.0450107	1	9.55442	33.7219	26.8406	9.94404	43.0122	64.4477
C8122_c0_seq1_	uncharacterized protein LOC568418 [Danio rerio] gb	222.283	-1.33199	0.6648	-2.00359	0.0451142	1	313.173	162.659	154.041	301.937	310.741	91.1475
C28190_c0_seq1_	PREDICTED: f-box/LRR-repeat protein 14 [Danio rerio]	120.357	-1.22372	0.610784	-2.00353	0.0451204	1	171.98	124.969	158.709	103.056	103.58	59.8443
C8555_c1_seq1_	DCN1-like protein 5 [Salmo salar] gb	53.3384	1.5425	0.769975	2.00331	0.0451444	1	6.36961	42.6483	31.5085	70.5123	102.703	66.2891
C95800_c1_seq1_	PREDICTED: brain-specific angiogenesis inhibitor 1-associated protein 2-like [Oreochromis niloticus]	167.851	1.37326	0.685646	2.00287	0.0451912	1	77.4969	135.879	255.569	90.4003	163.271	284.491
C82578_c0_seq1_	zgc:56201 [Danio rerio]	91.8142	1.37101	0.68453	2.00285	0.045193	1	26.54	97.1984	117.865	86.7843	119.381	103.116
C128347_c0_seq1_	unnamed protein product [Tetraodon nigroviridis]	14.5766	-1.53787	0.768035	-2.00235	0.0452476	1	29.7249	16.861	8.16886	6.32802	25.4562	0.920682
C12023_c0_seq1_	PREDICTED: hypothetical protein LOC569340 [Danio rerio]	263.786	-1.42614	0.71236	-2.002	0.0452852	1	404.47	277.71	108.529	429.402	266.851	95.7509
C125932_c0_seq1_	MAX-interacting protein [Danio rerio] gb	40.8078	1.54801	0.773503	2.0013	0.0453605	1	4.24641	78.3538	7.00188	56.0482	23.7006	75.4959
C19150_c0_seq1_	PREDICTED: ubiquitin carboxyl-terminal hydrolase CYLD-like [Oreochromis niloticus]	81.3982	-1.31675	0.657953	-2.00128	0.045362	1	128.454	89.2639	50.1802	94.9204	86.9023	38.6686
C465095_c0_seq1_	vomeronasal 1 receptor-like protein [Salmo salar]	181.266	-1.3255	0.662392	-2.00108	0.0453835	1	311.049	138.855	126.034	271.201	147.471	92.9888
C7213_c2_seq1_	S-adenosylmethionine synthase isoform type-1 [Danio rerio] gb	11.9007	1.49229	0.745788	2.00096	0.0453966	1	2.1232	8.92639	8.16886	13.5601	0.877801	37.7479
C211031_c0_seq1_	PREDICTED: leucine-rich repeat-containing protein 3B-like [Oreochromis niloticus]	47.7012	-1.39517	0.697391	-2.00055	0.0454409	1	94.4826	34.7137	45.5122	51.5282	35.112	24.8584
C51034_c0_seq1_	Sperm flagellar protein 1 [Salmo salar] gb	444.78	-1.52815	0.763937	-2.00037	0.0454606	1	1000.03	236.053	175.047	891.347	193.116	173.088
C51270_c0_seq1_	PREDICTED: Golgi reassembly-stacking protein 2-like [Oreochromis niloticus]	7.81054	-1.41721	0.708493	-2.00032	0.045466	1	30.7865	1.98364	2.33396	9.04003	0.877801	1.84136
C69477_c0_seq1_	F-box only protein 18 [Danio rerio] emb	127.888	1.55255	0.776266	2.00002	0.045498	1	21.232	143.814	172.713	13.5601	191.361	224.646
C186797_c0_seq1_	PREDICTED: plexin-B1 [Oreochromis niloticus]	20.4274	1.53969	0.76984	2.00002	0.0454983	1	2.1232	33.7219	3.50094	15.3681	24.5784	43.272
C90921_c0_seq1_	novel protein similat to H.sapiens KCNK1, potassium channel, subfamily K, member 1 (KCNK1) [Danio rerio]	87.549	-1.27547	0.638019	-1.99912	0.0455958	1	121.023	113.068	68.8519	98.5364	85.1467	38.6686
C1039_c0_seq1_	PREDICTED: Krueppel-like factor 3-like [Oreochromis niloticus]	47.3102	1.35361	0.677118	1.99907	0.0456006	1	20.1704	54.5501	57.1821	37.9681	41.2566	72.7338
C47781_c1_seq1_	PREDICTED: mannose-1-phosphate guanyltransferase beta-like [Oreochromis niloticus]	687.208	-1.15595	0.578307	-1.99885	0.0456249	1	1071.16	572.281	493.633	846.147	730.33	409.703
C102697_c0_seq1_	PREDICTED: tumor necrosis factor receptor superfamily member 19L-like [Oreochromis niloticus]	108.88	1.38581	0.693423	1.99851	0.0456617	1	40.3409	151.749	80.5217	71.4163	152.737	156.516
C448307_c0_seq1_	PREDICTED: POU domain, class 6, transcription factor 2-like [Oreochromis niloticus]	8.90092	1.53046	0.765866	1.99833	0.0456806	1	2.1232	3.96728	8.16886	5.42402	7.02241	26.6998
C20099_c0_seq1_	PREDICTED: protein Jade-1-like [Oreochromis niloticus]	193.881	-1.13647	0.568746	-1.99821	0.0456939	1	264.339	202.331	162.21	191.649	239.64	103.116
C25962_c0_seq1_	Aof2 protein [Danio rerio]	424.886	-1.2186	0.609992	-1.99773	0.0457456	1	677.302	444.336	254.402	513.474	421.344	238.457
C2223_c0_seq1_	PREDICTED: leucine-rich repeat-containing protein 14B-like [Oreochromis niloticus]	346.144	-1.40898	0.705387	-1.99746	0.0457755	1	487.275	382.843	150.541	543.306	394.133	118.768
C78796_c0_seq1_	PREDICTED: transmembrane protein 206-like [Oreochromis niloticus]	14.7498	-1.53175	0.766875	-1.99739	0.0457827	1	50.9569	14.8773	4.66792	6.32802	6.14461	5.52409
C117794_c0_seq1_	cyclin K [Danio rerio]	282.834	-1.49486	0.748425	-1.99735	0.0457875	1	596.62	176.544	113.197	520.706	171.171	118.768
C89693_c0_seq1_	PREDICTED: F-box/LRR-repeat protein 18-like [Oreochromis niloticus]	95.0729	-1.38058	0.691517	-1.99645	0.0458848	1	159.24	137.863	52.5141	100.344	78.1243	42.3513
C14343_c0_seq1_	Choline transporter-like protein 2 [Salmo salar]	216.242	1.09523	0.5486	1.99641	0.0458895	1	140.131	182.495	204.222	206.113	223.839	340.652
C21276_c2_seq1_	PREDICTED: hypothetical protein LOC100703121 [Oreochromis niloticus]	685.16	-1.31635	0.659482	-1.99603	0.0459307	1	1049.92	726.013	351.261	1004.35	663.617	315.794
C91035_c0_seq1_	nucleoporin GLE1 [Salmo salar] gb	850.34	-1.2686	0.635741	-1.99547	0.0459918	1	1355.67	740.89	480.796	1170.68	911.157	442.848
C21332_c0_seq1_	C-Myc-binding protein [Salmo salar]	154.026	-1.16013	0.581399	-1.99541	0.0459978	1	195.335	183.487	175.047	149.161	147.471	73.6545
C47312_c0_seq1_	PREDICTED: RAS guanyl-releasing protein 1-like [Oreochromis niloticus]	36.2922	1.48217	0.742915	1.99507	0.0460353	1	10.616	43.6401	53.6811	32.5441	20.1894	57.0823
C101663_c0_seq1_	novel homeodomain protein [Danio rerio]	176.377	1.23695	0.620552	1.9933	0.0462287	1	93.421	128.937	144.706	178.993	238.762	273.442
C30260_c1_seq1_	thyroid hormone receptor associated protein complex component TRAP230/KIAA0192 [Takifugu rubripes]	35.8487	-1.4613	0.733198	-1.99304	0.0462567	1	61.5729	31.7383	22.1726	54.2402	32.4786	12.8895
C60459_c0_seq1_	talin-2 [Danio rerio]	249.201	1.229	0.616649	1.99304	0.0462574	1	121.023	281.677	346.593	184.417	209.794	351.7
C133002_c0_seq1_	lin10 [Salmo salar]	15.1982	1.54304	0.774587	1.99209	0.0463614	1	2.1232	5.95093	26.8406	13.5601	11.4114	31.3032
C839_c32_seq1_	FBPL4 [Oncorhynchus mykiss] gb	1216.17	1.37736	0.691459	1.99195	0.0463761	1	481.967	1633.53	1456.39	486.354	1417.65	1821.11
C37805_c0_seq1_	PREDICTED: histone-binding protein N1/N2-like [Oreochromis niloticus]	629.738	-1.28615	0.645693	-1.99189	0.0463831	1	988.351	496.902	444.62	1007.96	527.558	313.032
C115530_c0_seq1_	autophagy-related protein 10 [Danio rerio] gb	59.4943	-1.38898	0.697464	-1.99147	0.0464295	1	90.2362	68.4356	38.5104	84.9763	51.7902	23.017
C65987_c1_seq1_	PREDICTED: F-box/LRR-repeat protein 4-like [Oreochromis niloticus]	117.693	-1.26727	0.636416	-1.99126	0.0464528	1	162.425	142.822	80.5217	127.464	140.448	52.4788
C8970_c0_seq1_	macrophage migration inhibitory factor [Oncorhynchus mykiss] gb	271.769	-1.44302	0.724722	-1.99114	0.0464655	1	338.651	379.867	117.865	393.241	329.175	71.8132
C26874_c0_seq1_	Prolyl 3-hydroxylase 1 [Dicentrarchus labrax]	24.7256	1.49889	0.7529	1.99082	0.0465001	1	7.43121	26.7792	22.1726	14.4641	34.2342	43.272
C265_c0_seq1_	60S ribosomal protein L30 [Salmo salar] gb	127.681	-1.51951	0.763348	-1.99059	0.0465264	1	201.704	115.051	31.5085	223.289	164.149	30.3825
C26621_c1_seq1_	PREDICTED: serine/threonine-protein kinase PAK 2-like isoform 4 [Oreochromis niloticus]	219.212	-1.09283	0.549377	-1.98921	0.0466775	1	298.31	202.331	214.724	270.297	207.161	122.451
C57958_c0_seq1_	TBC1 domain family, member 23 [Danio rerio]	14.6923	1.54275	0.775674	1.98891	0.0467113	1	3.18481	16.861	19.8387	9.94404	7.02241	31.3032
C197827_c0_seq1_	tRNA-splicing endonuclease subunit Sen2 [Danio rerio] gb	51.7877	1.41886	0.71339	1.9889	0.0467123	1	13.8008	55.542	57.1821	46.1042	75.4909	62.6063
C1200_c3_seq1_	Cytochrome c oxidase subunit 7C, mitochondrial precursor [Salmo salar] gb	48.2626	-1.47167	0.740158	-1.98833	0.0467757	1	64.7577	75.3784	28.0075	51.5282	57.9348	11.9689
C14687_c1_seq1_	Supervillin [Dicentrarchus labrax]	74.7651	-1.33789	0.672888	-1.98828	0.0467812	1	147.563	48.5992	70.0188	75.9363	63.2017	43.272
C126455_c0_seq1_	PREDICTED: autophagy-related protein 2 homolog B-like [Oreochromis niloticus]	31.5644	1.4934	0.75113	1.9882	0.0467894	1	6.36961	49.591	28.0075	27.1201	36.8676	41.4307
C162323_c0_seq1_	unnamed protein product [Tetraodon nigroviridis]	10.6672	-1.46312	0.736188	-1.98743	0.0468752	1	30.7865	1.98364	10.5028	17.1761	2.6334	0.920682
C12545_c0_seq1_	Zgc:162544 protein [Danio rerio]	94.9768	-1.2614	0.634798	-1.98709	0.0469129	1	153.932	107.117	75.8537	112.096	70.2241	50.6375
C2268_c2_seq1_	PREDICTED: hypothetical protein LOC796684 isoform 1 [Danio rerio]	1092.78	1.25477	0.631509	1.98694	0.0469293	1	583.881	836.105	1631.44	731.339	1019.13	1754.82
C38993_c0_seq1_	putative ferric-chelate reductase 1 precursor [Danio rerio] sp	2676.04	1.17353	0.590971	1.98577	0.0470588	1	1574.36	2188.95	3195.19	1763.71	3111.8	4222.25
C218190_c0_seq1_	PREDICTED: serine/threonine-protein phosphatase 6 regulatory ankyrin repeat subunit C-like [Oreochromis niloticus]	12.3056	1.51925	0.765124	1.98562	0.0470756	1	2.1232	21.8201	7.00188	4.52002	6.14461	32.2239
C29883_c0_seq1_	PREDICTED: protein Hook homolog 1-like [Oreochromis niloticus]	700.421	1.47924	0.745056	1.9854	0.0470998	1	180.472	988.845	672.181	214.249	1173.62	973.16
C99339_c0_seq1_	PREDICTED: zinc finger and BTB domain-containing protein 39-like [Oreochromis niloticus]	414.618	-1.14893	0.578728	-1.98527	0.0471147	1	599.805	475.082	278.908	470.986	432.756	230.17
C13341_c2_seq1_	PREDICTED: kelch-like ECH-associated protein 1-like [Oreochromis niloticus]	321.952	-1.48592	0.748547	-1.98507	0.0471363	1	589.189	259.857	82.8556	543.306	342.342	114.165
C119854_c0_seq1_	solute carrier family 11 member 2 isoform alpha [Dicentrarchus labrax]	40.9371	-1.39549	0.703065	-1.98487	0.0471585	1	78.5585	43.6401	25.6736	38.8721	38.6232	20.255
C86205_c0_seq1_	PREDICTED: FH1/FH2 domain-containing protein 3 [Oreochromis niloticus]	54.9822	1.46744	0.739422	1.98457	0.047192	1	20.1704	53.5583	33.8424	31.6401	92.1691	98.5129
C3596_c0_seq1_	Jagged 2 [Danio rerio]	56.5317	-1.30321	0.656783	-1.98424	0.0472293	1	84.9282	45.6238	50.1802	65.0882	67.5907	25.7791
C147212_c0_seq1_	PREDICTED: vacuolar protein sorting-associated protein 13D [Danio rerio]	143.592	1.53416	0.77349	1.98343	0.04732	1	19.1088	277.71	33.8424	137.409	200.139	193.343
C1722_c0_seq1_	PREDICTED: NACHT, LRR and PYD domains-containing protein 3 [Danio rerio]	12.5514	-1.53373	0.773285	-1.9834	0.0473229	1	24.4168	10.91	14.0038	13.5601	9.65581	2.76204
C38323_c0_seq1_	PREDICTED: phosphatidylinositol-4,5-bisphosphate 3-kinase catalytic subunit beta isoform-like [Oreochromis niloticus]	1512.1	0.93707	0.472531	1.98309	0.0473577	1	953.319	1630.55	1445.89	1467.2	1607.25	1968.42
C27858_c1_seq1_	TNF superfamily member 10-like protein [Oncorhynchus mykiss] gb	26.4671	-1.53945	0.776312	-1.98303	0.047364	1	71.1273	6.94275	22.1726	37.0641	12.2892	9.20682
C112526_c0_seq1_	PREDICTED: uncharacterized aarF domain-containing protein kinase 2-like [Oreochromis niloticus]	11.0255	-1.50845	0.760816	-1.98267	0.047404	1	33.9713	15.8691	4.66792	3.61601	5.2668	2.76204
C29476_c0_seq1_	hypoxia up-regulated protein 1 precursor [Danio rerio] sp	890.666	-1.41891	0.715778	-1.98234	0.0474415	1	1626.37	621.872	414.278	1599.18	687.318	394.972
C115891_c0_seq1_	granulocyte colony-stimulating factor precursor [Oncorhynchus mykiss] emb	194.573	-1.52988	0.771783	-1.98226	0.04745	1	432.072	72.4029	87.5235	424.882	84.2689	66.2891
C2432_c3_seq1_	PREDICTED: E1A-binding protein p400-like [Oreochromis niloticus]	80.2786	-1.36296	0.687595	-1.98221	0.0474553	1	134.823	61.4929	71.1858	122.04	55.3014	36.8273
C13585_c0_seq1_	PREDICTED: U5 small nuclear ribonucleoprotein 200 kDa helicase [Oreochromis niloticus]	186.565	1.05606	0.532782	1.98216	0.0474617	1	102.975	192.413	197.22	188.937	196.627	241.219
C187948_c0_seq1_	unnamed protein product [Tetraodon nigroviridis]	8.92099	1.48856	0.751016	1.98206	0.0474728	1	2.1232	8.92639	5.8349	5.42402	1.7556	29.4618
C46650_c0_seq1_	PREDICTED: 52 kDa repressor of the inhibitor of the protein kinase [Oreochromis niloticus]	1872.7	-1.01482	0.512018	-1.98199	0.04748	1	2548.91	1993.56	1671.12	2250.06	1631.83	1140.72
C42797_c0_seq1_	myotubularin-related protein 6 [Salmo salar] gb	196.523	-1.29799	0.654899	-1.98196	0.0474834	1	282.386	138.855	171.546	314.593	185.216	86.5441
C4705_c3_seq1_	PREDICTED: zinc finger protein 106 homolog [Danio rerio]	22.9553	-1.50549	0.759602	-1.98194	0.0474856	1	40.3409	17.8528	16.3377	19.8881	36.8676	6.44477
C50337_c1_seq1_	PREDICTED: protein FAM193A-like [Oreochromis niloticus]	31.3679	-1.50847	0.761143	-1.98185	0.0474962	1	72.1889	17.8528	14.0038	36.1601	35.112	12.8895
C43161_c1_seq1_	COMM domain-containing protein 8 [Esox lucius]	863.095	-1.27245	0.642129	-1.98161	0.0475234	1	1383.27	786.514	516.972	1302.67	742.619	446.531
C16944_c0_seq1_	UBX domain-containing protein 2 [Salmo salar] gb	54.5599	-1.41832	0.715832	-1.98136	0.0475514	1	73.2505	65.4602	33.8424	75.0323	63.2017	16.5723
C106218_c0_seq1_	PREDICTED: protein Dom3Z-like [Oreochromis niloticus]	21.4028	1.53119	0.772916	1.98106	0.0475846	1	5.30801	23.8037	33.8424	9.94404	13.167	42.3513
C78560_c0_seq1_	PREDICTED: zinc transporter ZIP9-B-like [Danio rerio]	51.4573	-1.51755	0.766065	-1.98097	0.0475949	1	116.776	21.8201	7.00188	133.793	21.0672	8.28613
C1905_c2_seq1_	PREDICTED: V-type proton ATPase subunit S1-like [Oreochromis niloticus]	26.6611	1.50855	0.761526	1.98095	0.0475964	1	9.55442	11.9019	23.3396	37.0641	21.945	56.1616
C20367_c3_seq1_	PREDICTED: nuclear pore complex protein Nup205 [Oreochromis niloticus]	377.028	-1.3507	0.681866	-1.98089	0.0476034	1	503.199	528.641	187.884	431.21	473.135	138.102
C10505_c2_seq1_	signal transducer and activator of transcription 2 [Salmo salar] gb	186.641	-1.47169	0.743077	-1.98053	0.0476437	1	375.807	99.1821	95.6924	347.137	123.77	78.2579
C48267_c0_seq1_	PREDICTED: nuclear distribution protein nudE-like 1-A-like [Oreochromis niloticus]	158.586	-1.25805	0.635333	-1.98014	0.0476873	1	290.879	165.634	140.038	98.5364	159.76	96.6716
C582_c0_seq1_	PREDICTED: ATP synthase subunit beta, mitochondrial-like [Oreochromis niloticus]	2559.83	-1.4624	0.738565	-1.98006	0.0476967	1	3151.9	3577.5	869.401	3434.31	3721	604.888
C234_c4_seq1_	adenosine kinase a [Salmo salar] gb	271.124	-1.49706	0.756391	-1.97922	0.0477913	1	491.522	110.092	116.698	551.442	268.607	88.3854
C98233_c0_seq1_	PREDICTED: SH2 domain-containing protein 3C-like [Oreochromis niloticus]	28.1764	1.45756	0.736558	1.97887	0.0478301	1	4.24641	3.96728	70.0188	8.13603	3.5112	79.1786
C111658_c0_seq1_	Myosin phosphatase Rho-interacting protein, partial [Dicentrarchus labrax]	90.0218	1.34092	0.67805	1.9776	0.0479734	1	45.6489	106.125	64.1839	56.0482	108.847	159.278
C8214_c0_seq1_	PREDICTED: ATP-binding cassette sub-family B member 7, mitochondrial-like [Oreochromis niloticus]	1025.81	1.05592	0.533961	1.97753	0.0479819	1	574.327	1141.59	1024.61	828.067	1242.09	1344.2
C176768_c0_seq1_	PREDICTED: nicotinate phosphoribosyltransferase-like [Oreochromis niloticus]	19.6067	1.53364	0.775534	1.97752	0.0479824	1	5.30801	21.8201	23.3396	5.42402	17.556	44.1927
C213728_c0_seq1_	PREDICTED: BTB/POZ domain-containing protein KCTD15-like [Loxodonta africana]	16.3454	-1.53208	0.775216	-1.97633	0.0481174	1	37.1561	13.8855	5.8349	20.7921	15.8004	4.60341
C3137_c4_seq1_	Cytochrome c oxidase subunit 5B, mitochondrial precursor [Salmo salar] gb	696.793	-1.38277	0.699689	-1.97627	0.0481247	1	1283.48	592.117	694.353	1001.64	270.363	338.811
C16301_c0_seq1_	RNA-binding protein 39 [Salmo salar]	229.472	-1.41052	0.713857	-1.97592	0.0481643	1	303.618	185.47	124.867	403.186	288.796	70.8925
C55605_c2_seq1_	PREDICTED: aftiphilin-like [Oreochromis niloticus]	22.9223	-1.5229	0.770857	-1.9756	0.0482002	1	38.2177	24.7955	9.33585	30.7361	29.8452	4.60341
C139138_c0_seq1_	hypothetical protein OsI 05777 [Oryza sativa Indica Group]	54.8407	1.53348	0.776225	1.97556	0.0482042	1	4.24641	83.313	101.527	47.9122	19.3116	72.7338
C33380_c0_seq1_	PREDICTED: hypothetical protein LOC100000219 [Danio rerio]	1581.54	-1.19788	0.606483	-1.97513	0.0482536	1	2559.52	1502.61	1026.94	2145.2	1333.38	921.602
C91947_c0_seq1_	Zinc finger protein 509 [Dicentrarchus labrax]	20.2399	-1.51982	0.769521	-1.97502	0.0482664	1	27.6016	21.8201	17.5047	28.9281	22.8228	2.76204
C198366_c0_seq1_	PREDICTED: solute carrier family 22 member 13-like [Danio rerio]	19.9014	-1.53301	0.776233	-1.97494	0.0482753	1	43.5257	15.8691	4.66792	24.4081	26.334	4.60341
C152078_c0_seq1_	PREDICTED: serine/threonine-protein phosphatase 6 regulatory ankyrin repeat subunit A [Danio rerio]	56.9864	-1.34293	0.680044	-1.97476	0.0482952	1	71.1273	50.5829	66.5179	62.3762	71.9797	19.3343
C23877_c0_seq1_	glucose transporter 1A [Oncorhynchus mykiss] gb	85.3799	-1.51109	0.765617	-1.97369	0.0484167	1	149.686	138.855	8.16886	103.96	108.847	2.76204
C129604_c0_seq1_	C13orf27 homolog [Salmo salar]	199.738	-1.25746	0.637122	-1.97366	0.0484201	1	273.893	216.217	136.537	291.993	190.483	89.3061
C11135_c0_seq1_	PREDICTED: hypothetical protein LOC100693115 [Oreochromis niloticus]	56.6128	-1.46635	0.74307	-1.97337	0.048454	1	111.468	37.6892	80.5217	63.2802	23.7006	23.017
C7964_c1_seq1_	Interferon regulatory factor 2-binding protein 2-A [Salmo salar] gb	79.2692	-1.27945	0.648449	-1.9731	0.048484	1	141.193	81.3293	56.0151	64.1842	87.7801	45.1134
C58504_c0_seq1_	xylulose kinase [Danio rerio] gb	183.202	1.13409	0.574979	1.97241	0.0485633	1	96.6058	199.356	226.394	180.801	147.471	248.584
C6631_c5_seq1_	Histone acetyltransferase p300 [Dicentrarchus labrax]	202.402	-1.19507	0.605964	-1.97217	0.0485898	1	314.234	160.675	219.392	257.641	149.226	113.244
C9921_c0_seq1_	UPF0527 membrane protein [Salmo salar]	304.451	-1.2321	0.624801	-1.97198	0.0486119	1	415.086	361.023	196.053	303.745	409.933	140.864
C125051_c0_seq1_	PREDICTED: membrane metallo-endopeptidase-like 1 [Oreochromis niloticus]	47.2576	1.53065	0.776239	1.97188	0.048623	1	1.0616	78.3538	49.0132	52.4322	46.5234	56.1616
C37972_c0_seq1_	PREDICTED: active regulator of SIRT1-like [Oreochromis niloticus]	144.075	1.23579	0.626739	1.97177	0.0486359	1	63.6961	144.806	186.717	105.768	173.805	189.66
C25558_c1_seq1_	unnamed protein product [Tetraodon nigroviridis]	163.291	1.25632	0.637162	1.97175	0.0486383	1	91.2978	166.626	112.03	122.04	211.55	276.204
C69438_c0_seq1_	PREDICTED: serine beta-lactamase-like protein LACTB, mitochondrial-like [Oreochromis niloticus]	112.578	-1.26733	0.642883	-1.97132	0.048687	1	184.719	121.002	66.5179	129.272	114.114	59.8443
C1759_c0_seq1_	bridging integrator 1 [Danio rerio] gb	14.3533	1.43148	0.726307	1.9709	0.0487353	1	2.1232	11.9019	2.33396	0.904003	22.8228	46.0341
C26479_c1_seq1_	PREDICTED: unconventional prefoldin RPB5 interactor-like [Oreochromis niloticus]	238.746	1.08044	0.548367	1.97028	0.0488058	1	145.439	259.857	242.732	184.417	250.173	349.859
C9625_c0_seq1_	L-threonine 3-dehydrogenase, mitochondrial [Danio rerio] gb	30.8402	1.46589	0.744037	1.97018	0.0488177	1	2.1232	52.5665	18.6717	32.5441	0.877801	78.2579
C117426_c0_seq1_	RAD52 motif-containing protein 1 [Salmo salar] gb	197.139	1.45839	0.740296	1.97	0.0488378	1	38.2177	232.086	225.227	112.096	362.532	212.677
C18890_c0_seq1_	COP9 signalosome complex subunit 4 [Salmo salar] gb	46.5834	-1.46564	0.744249	-1.96928	0.048921	1	61.5729	81.3293	30.3415	44.2962	50.9124	11.0482
C189363_c0_seq1_	OlGRK-C [Oryzias latipes] dbj	137.161	-1.37098	0.696362	-1.96878	0.0489787	1	210.197	237.045	87.5235	132.889	100.069	55.2409
C169253_c0_seq1_	PREDICTED: ras-related protein Rab-30-like [Oreochromis niloticus]	21.89	-1.50604	0.765139	-1.96832	0.0490311	1	59.4497	20.8282	1.16698	18.0801	27.2118	4.60341
C3413_c0_seq1_	prohibitin [Salmo salar] gb	2025.37	-1.09224	0.554917	-1.9683	0.0490332	1	3052.11	2130.43	1443.56	2453.47	1820.56	1252.13
C62657_c1_seq1_	helicase-like transcription factor isoform 1 [Mus musculus] sp	173.14	-1.30262	0.661861	-1.96812	0.0490538	1	303.618	171.585	103.861	237.753	129.037	92.9888
C23628_c6_seq1_	PREDICTED: raftlin [Ornithorhynchus anatinus]	34.6931	1.44657	0.735026	1.96806	0.0490616	1	14.8624	30.7464	44.3453	31.6401	18.4338	68.1304
C31225_c0_seq1_	PREDICTED: trimeric intracellular cation channel type B-like [Oreochromis niloticus]	1422.47	1.27169	0.646206	1.96794	0.0490749	1	754.799	832.138	2144.91	1305.38	1151.67	2345.9
C10279_c2_seq1_	Negative elongation factor D [Salmo salar] gb	676.872	-1.21616	0.618085	-1.96763	0.0491111	1	922.532	639.724	477.295	1033.28	668.006	320.397
C95080_c0_seq1_	unnamed protein product [Tetraodon nigroviridis]	277.847	1.31213	0.666925	1.96743	0.0491336	1	145.439	287.628	393.272	155.489	201.894	483.358
C125863_c0_seq1_	PREDICTED: ubiquitin carboxyl-terminal hydrolase 20-like [Oreochromis niloticus]	15.3588	1.52148	0.773482	1.96706	0.0491766	1	2.1232	16.861	3.50094	19.8881	17.556	32.2239
C16644_c0_seq1_	PREDICTED: AP-2 complex subunit alpha-2-like isoform 2 [Oreochromis niloticus]	42.1053	-1.35624	0.689515	-1.96695	0.049189	1	67.9425	41.6565	29.1745	52.4322	43.0122	18.4136
C117489_c0_seq1_	Ataxin-2-like protein [Dicentrarchus labrax]	10.0966	-1.49719	0.761208	-1.96686	0.0491989	1	31.8481	3.96728	5.8349	12.656	3.5112	2.76204
C94320_c0_seq1_	novel protein with a Glycosyl hydrolase family 85 domain (zgc:158649) [Danio rerio]	119.624	1.22269	0.621747	1.96654	0.0492366	1	54.1417	105.133	150.541	100.344	149.226	158.357
C204522_c0_seq1_	uncharacterized protein LOC566223 [Danio rerio] emb	5.19278	-1.30307	0.662862	-1.96582	0.0493189	1	22.2936	0	3.50094	1.80801	2.6334	0.920682
C47377_c1_seq1_	Nuclear prelamin A recognition factor [Dicentrarchus labrax]	27.2589	-1.45447	0.73991	-1.96574	0.0493283	1	70.0657	0.991821	38.5104	42.4882	9.65581	1.84136
C202_c2_seq1_	Troponin C, skeletal muscle [Salmo salar]	61.3768	-1.43658	0.730818	-1.96572	0.0493309	1	111.468	50.5829	32.6755	102.152	46.5234	24.8584
C52605_c2_seq1_	PREDICTED: ubiquitin carboxyl-terminal hydrolase 34, partial [Oreochromis niloticus]	138.153	1.40785	0.71628	1.9655	0.0493566	1	44.5873	189.438	60.683	194.361	148.348	191.502
C16998_c0_seq1_	Metalloproteinase inhibitor 2 precursor [Salmo salar] gb	391.225	1.36646	0.695413	1.96497	0.0494182	1	173.041	487.976	374.601	152.777	512.636	646.318
C235430_c0_seq1_	PREDICTED: acyl-CoA synthetase family member 4-like [Oreochromis niloticus]	27.6439	-1.52493	0.776088	-1.9649	0.0494263	1	48.8337	47.6074	7.00188	26.2161	31.6008	4.60341
C48249_c0_seq1_	PREDICTED: sushi-repeat-containing protein SRPX-like [Oreochromis niloticus]	39.7219	-1.48692	0.757056	-1.96409	0.0495202	1	76.4353	7.93457	18.6717	93.1124	41.2566	0.920682
C17148_c4_seq1_	PREDICTED: sorting and assembly machinery component 50 homolog A-like [Oreochromis niloticus]	52.5704	-1.52143	0.774679	-1.96394	0.0495366	1	93.421	54.5501	12.8368	107.576	35.9898	11.0482
C54533_c1_seq1_	PREDICTED: microspherule protein 1 [Oreochromis niloticus]	34.8159	1.50943	0.768606	1.96386	0.0495468	1	8.49282	59.5093	31.5085	11.752	36.8676	60.765
C17603_c0_seq1_	PREDICTED: pleckstrin homology domain-containing family A member 7-like [Oreochromis niloticus]	4.66238	1.14034	0.58091	1.96303	0.0496429	1	1.0616	0	1.16698	1.80801	0	23.9377
C55919_c0_seq1_	PREDICTED: inhibitor of nuclear factor kappa-B kinase subunit alpha-like [Oreochromis niloticus]	34.6396	1.50857	0.768601	1.96274	0.0496759	1	1.0616	37.6892	7.00188	46.1042	57.057	58.9236
C6940_c0_seq1_	mediator of RNA polymerase II transcription subunit 7 [Salmo salar] gb	81.729	-1.40575	0.716418	-1.96219	0.0497399	1	173.041	76.3702	35.0094	70.5123	92.1691	43.272
C42513_c0_seq1_	PREDICTED: nucleolar protein 10-like [Oreochromis niloticus]	56.9685	1.40954	0.718529	1.9617	0.0497979	1	14.8624	84.3048	50.1802	49.7202	74.6131	68.1304
C967_c2_seq1_	ATP synthase subunit g, mitochondrial [Salmo salar] gb	125.681	-1.47908	0.754008	-1.96162	0.0498062	1	139.07	149.765	64.1839	144.641	235.251	21.1757
C22514_c2_seq1_	valyl-tRNA synthetase, mitochondrial [Danio rerio] gb	184.369	-1.34587	0.686111	-1.9616	0.0498094	1	270.708	214.233	96.8594	286.569	163.271	74.5752
C249849_c0_seq1_	PREDICTED: probable palmitoyltransferase ZDHHC23-like [Oreochromis niloticus]	30.4349	1.50593	0.767854	1.96122	0.0498538	1	3.18481	52.5665	7.00188	8.13603	50.0346	61.6857
C68795_c1_seq1_	PREDICTED: UPF0532 protein C7orf60 homolog [Oreochromis niloticus]	46.0525	-1.42497	0.726803	-1.9606	0.0499255	1	74.3121	46.6156	22.1726	56.9522	59.6905	16.5723
C171611_c0_seq1_	novel protein [Danio rerio]	41.1283	1.45892	0.744366	1.95995	0.0500022	1	10.616	25.7873	39.6773	41.5842	71.1019	58.0029
C72_c286_seq1_	PREDICTED: ubiquitin carboxyl-terminal hydrolase 24 [Oreochromis niloticus]	258.172	1.41744	0.723307	1.95967	0.0500345	1	78.5585	358.047	102.694	263.065	395.888	350.78
C11584_c2_seq1_	RecName: Full=Dynamin-like 120 kDa protein, mitochondrial; AltName: Full=120 kDa G protein expressed in motor neurons; AltName: Full=Optic atrophy protein 1 homolog; AltName: Full=mG120; Flags: Precursor dbj	14.9349	1.51268	0.772149	1.95905	0.0501072	1	5.30801	15.8691	9.33585	12.656	10.5336	35.9066
C142820_c0_seq1_	PREDICTED: TBC1 domain family member 19 [Oreochromis niloticus]	8.92391	-1.1801	0.602414	-1.95896	0.050118	1	38.2177	0.991821	1.16698	0	13.167	0
C26723_c0_seq1_	PREDICTED: sorting nexin-5-like [Oreochromis niloticus]	1642.46	1.25301	0.639648	1.95891	0.0501233	1	973.489	1476.82	2000.2	842.531	1626.56	2935.13
C14801_c0_seq1_	Hypoxia up-regulated protein 1 precursor [Salmo salar]	1668.84	-1.45311	0.741878	-1.95869	0.0501496	1	3400.31	980.911	717.693	3190.23	991.037	732.862
C1833_c6_seq1_	RecName: Full=Zinc finger RNA-binding protein	124.337	-1.25641	0.641457	-1.95868	0.0501507	1	204.889	108.108	88.6905	172.665	104.458	67.2098
C22161_c1_seq1_	PREDICTED: integrator complex subunit 2-like [Oreochromis niloticus]	193.647	-1.17521	0.600049	-1.95852	0.0501685	1	306.803	150.757	199.554	243.177	148.348	113.244
C159193_c0_seq1_	PREDICTED: plexin-B1 [Oreochromis niloticus]	135.117	1.29422	0.66084	1.95844	0.0501779	1	52.0185	176.544	89.8575	140.121	179.071	173.088
C23744_c2_seq1_	PREDICTED: rab GTPase-binding effector protein 1-like [Oreochromis niloticus]	77.0481	-1.44242	0.73662	-1.95816	0.0502109	1	101.914	121.002	42.0113	113.904	63.2017	20.255
C38725_c1_seq1_	unnamed protein product [Tetraodon nigroviridis]	22.4836	-1.49482	0.763445	-1.958	0.0502304	1	37.1561	32.7301	29.1745	16.2721	14.0448	5.52409
C36989_c0_seq1_	unnamed protein product [Tetraodon nigroviridis]	23.0515	-1.5101	0.771258	-1.95797	0.0502334	1	38.2177	38.681	16.3377	9.04003	35.112	0.920682
C84603_c0_seq1_	PREDICTED: codanin-1 [Oreochromis niloticus]	207.664	-1.21056	0.61841	-1.95753	0.0502851	1	239.922	206.299	198.387	233.233	285.285	82.8613
C13784_c1_seq1_	Ubiquitin carboxyl-terminal hydrolase isozyme L5 [Salmo salar]	60.176	-1.50361	0.76813	-1.9575	0.050289	1	95.5442	119.019	18.6717	77.7443	49.1568	0.920682
C57870_c0_seq1_	PREDICTED: SAM and SH3 domain-containing protein 1-like [Oreochromis niloticus]	429.312	1.16532	0.595386	1.95725	0.0503182	1	250.538	364.99	591.659	322.729	375.699	670.256
C3053_c0_seq1_	Cytochrome c1, heme protein, mitochondrial precursor [Salmo salar]	235.266	-1.44809	0.739976	-1.95694	0.0503551	1	335.466	226.135	78.1877	384.201	320.397	67.2098
C30038_c1_seq1_	PREDICTED: voltage-dependent calcium channel gamma-6 subunit-like [Oreochromis niloticus]	20.7807	-1.51756	0.775511	-1.95686	0.0503645	1	28.6633	16.861	24.5066	35.2561	17.556	1.84136
C760_c3_seq1_	apolipoprotein E precursor [Oncorhynchus mykiss] emb	18.4112	1.45054	0.74138	1.95654	0.0504019	1	1.0616	7.93457	1.16698	23.5041	29.8452	46.9548
C128129_c0_seq1_	PREDICTED: hypothetical protein LOC100700470 [Oreochromis niloticus]	71.378	-1.33379	0.681795	-1.95629	0.050431	1	105.099	82.3211	57.1821	50.6242	103.58	29.4618
C17791_c1_seq1_	PREDICTED: uncharacterized protein KIAA1109-like [Oreochromis niloticus]	399.241	1.09016	0.557369	1.95591	0.0504763	1	230.368	492.935	404.942	295.609	409.055	562.536
C39287_c0_seq1_	uncharacterized protein LOC402967 [Danio rerio] gb	7.68028	1.42568	0.728982	1.95572	0.0504985	1	1.0616	3.96728	1.16698	3.61601	11.4114	24.8584
C3204_c0_seq1_	Adenylate kinase isoenzyme 2, mitochondrial [Salmo salar]	100.62	-1.44967	0.741328	-1.9555	0.050524	1	123.146	139.847	45.5122	123.848	148.348	23.017
C19357_c0_seq1_	PREDICTED: transmembrane protein 11, mitochondrial-like [Oreochromis niloticus]	17.7028	-1.50153	0.767983	-1.95516	0.0505641	1	28.6633	12.8937	19.8387	26.2161	14.9226	3.68273
C2109_c6_seq1_	26S protease regulatory subunit 7 [Salmo salar] gb	294.004	-1.26692	0.647997	-1.95513	0.0505679	1	383.238	342.178	173.88	383.297	359.898	121.53
C18885_c0_seq1_	PREDICTED: histone-lysine N-methyltransferase SETD2-like [Oreochromis niloticus]	516.097	1.0392	0.531613	1.95481	0.050606	1	303.618	572.281	592.826	404.09	524.047	699.718
C9021_c6_seq1_	Isocitrate dehydrogenase [NAD] subunit beta, mitochondrial [Dicentrarchus labrax]	7.35943	-1.49755	0.766134	-1.95469	0.05062	1	18.0472	5.95093	5.8349	8.13603	5.2668	0.920682
C27880_c0_seq1_	hedgehog interacting protein-like protein [Branchiostoma floridae] gb	1293.67	1.1502	0.588432	1.95468	0.0506205	1	694.288	1295.32	1701.46	838.915	1404.48	1827.55
C30773_c0_seq1_	transcriptional regulator ATRX [Danio rerio]	156.36	1.12028	0.573204	1.95443	0.050651	1	85.9898	192.413	136.537	135.601	169.416	218.202
C131924_c0_seq1_	cell division cycle 25C [Xenopus (Silurana) tropicalis] gb	322.862	-1.45216	0.743108	-1.95417	0.0506817	1	587.066	238.037	109.696	618.338	261.585	122.451
C266337_c0_seq1_	PREDICTED: protein FAM124A-like [Oreochromis niloticus]	32.4761	1.5161	0.776054	1.9536	0.0507491	1	8.49282	26.7792	63.017	9.04003	17.556	69.9718
C322460_c0_seq1_	PREDICTED: galactose-3-O-sulfotransferase 2-like [Monodelphis domestica]	21.853	1.46053	0.747942	1.95273	0.0508514	1	5.30801	19.8364	22.1726	24.4081	28.0896	31.3032
C29252_c0_seq1_	6-phosphogluconolactonase [Salmo salar] gb	73.8842	-1.45393	0.744598	-1.95264	0.0508622	1	113.591	70.4193	26.8406	110.288	100.069	22.0964
C27453_c0_seq1_	Uroporphyrinogen decarboxylase [Salmo salar] gb	436.193	-1.21606	0.622794	-1.95259	0.0508687	1	718.704	389.786	262.571	583.986	411.689	250.425
C138574_c0_seq1_	PREDICTED: hypothetical protein LOC100329810 [Danio rerio]	40.4246	1.33841	0.68559	1.9522	0.0509141	1	16.9856	44.6319	42.0113	29.8321	47.4012	61.6857
C274212_c0_seq1_	PREDICTED: nuclear receptor subfamily 4 group A member 2-like [Oreochromis niloticus]	14.4418	-1.50811	0.772719	-1.9517	0.050974	1	29.7249	15.8691	3.50094	20.7921	14.9226	1.84136
C90311_c0_seq1_	PREDICTED: LIM/homeobox protein Lhx9-like isoform 1 [Oreochromis niloticus]	17.6085	-1.51285	0.775171	-1.95163	0.0509818	1	25.4784	24.7955	19.8387	11.752	21.945	1.84136
C15349_c0_seq1_	adenylosuccinate lyase [Ctenopharyngodon idella] gb	12.5462	-1.48617	0.761587	-1.95141	0.0510079	1	24.4168	15.8691	12.8368	7.23203	14.9226	0
C24173_c0_seq1_	signal transducing adaptor molecule (SH3 domain and ITAM motif) 1 [Danio rerio] emb	34.0211	1.50099	0.769228	1.9513	0.0510219	1	10.616	24.7955	17.5047	18.0801	64.0795	69.0511
C161793_c0_seq1_	PREDICTED: WD repeat-containing and planar cell polarity effector protein fritz homolog [Oreochromis niloticus]	14.9828	-1.51431	0.776194	-1.95095	0.0510633	1	41.4025	5.95093	9.33585	16.2721	11.4114	5.52409
C3728_c0_seq1_	PREDICTED: propionyl-CoA carboxylase beta chain, mitochondrial-like [Oreochromis niloticus]	29.2512	-1.51384	0.776136	-1.95048	0.0511185	1	44.5873	26.7792	15.1707	66.8963	19.3116	2.76204
C21455_c0_seq1_	Kelch domain-containing protein 1 [Dicentrarchus labrax]	1330.53	1.07632	0.552044	1.94969	0.0512128	1	749.491	1422.27	1633.77	955.532	1418.53	1803.62
C35762_c0_seq1_	PREDICTED: RNA-binding protein 26-like [Oreochromis niloticus]	34.5724	-1.46218	0.750521	-1.94821	0.0513893	1	73.2505	13.8855	43.1783	32.5441	29.8452	14.7309
C310_c0_seq1_	40S ribosomal protein S24 [Salmo salar] gb	545.059	-1.32976	0.682591	-1.94811	0.0514014	1	673.056	630.798	287.077	796.427	696.096	186.898
C2875_c0_seq1_	Ubiquitin-conjugating enzyme E2 K [Salmo salar] gb	29.6127	-1.50434	0.772404	-1.9476	0.0514628	1	66.8809	17.8528	16.3377	52.4322	14.0448	10.1275
C98377_c1_seq1_	PREDICTED: hypothetical protein LOC100711635 [Oreochromis niloticus]	6.76355	-1.24578	0.639708	-1.94743	0.0514836	1	28.6633	8.92639	1.16698	0.904003	0	0.920682
C72601_c0_seq1_	PREDICTED: TBC1 domain family member 16 [Oreochromis niloticus]	119.64	1.17984	0.605936	1.94713	0.051519	1	53.0801	133.896	152.874	114.808	115.87	147.309
C36087_c0_seq1_	CS022 protein [Salmo salar] gb	266.995	-1.11222	0.571416	-1.94642	0.0516042	1	428.887	268.783	189.051	294.705	249.295	171.247
C35423_c0_seq1_	CU070 protein [Salmo salar] gb	501.798	-1.44688	0.743439	-1.94621	0.05163	1	805.756	442.352	138.871	883.211	576.715	163.881
C1136_c12_seq1_	dipeptidyl peptidase 3 [Salmo salar] gb	40.9302	-1.51014	0.776196	-1.94556	0.0517076	1	93.421	14.8773	18.6717	16.2721	91.2913	11.0482
C96028_c0_seq1_	PREDICTED: hypothetical protein LOC100693244 [Oreochromis niloticus]	31.3472	-1.42357	0.731768	-1.94538	0.0517292	1	50.9569	47.6074	23.3396	24.4081	30.723	11.0482
C28719_c0_seq1_	methylthioribose-1-phosphate isomerase [Danio rerio] sp	39.7479	1.40597	0.72293	1.94483	0.0517959	1	19.1088	30.7464	52.5141	26.2161	30.723	79.1786
C34375_c0_seq1_	PREDICTED: caveolin-2-like [Oreochromis niloticus]	13.21	-1.43081	0.735878	-1.94436	0.0518517	1	39.2793	13.8855	19.8387	0.904003	3.5112	1.84136
C20073_c4_seq1_	spindle and kinetochore-associated protein 2 [Salmo salar] sp	186.961	1.04452	0.537264	1.94414	0.0518784	1	109.345	184.479	162.21	209.729	201.894	254.108
C90685_c0_seq1_	Sushi domain-containing protein 3 [Salmo salar]	34.4536	1.49432	0.768732	1.94388	0.0519101	1	5.30801	19.8364	87.5235	7.23203	13.167	73.6545
C12011_c0_seq1_	PREDICTED: feline leukemia virus subgroup C receptor-related protein 2 [Oreochromis niloticus]	80.541	-1.50217	0.772946	-1.94343	0.0519636	1	144.378	92.2393	11.6698	110.288	105.336	19.3343
C24968_c2_seq1_	PREDICTED: mitochondrial import inner membrane translocase subunit TIM44-like [Oreochromis niloticus]	1382.32	-1.36166	0.700761	-1.94312	0.0520018	1	1900.27	1708.91	540.312	1854.11	1796.86	493.485
C253879_c0_seq1_	PREDICTED: delta-like protein A-like [Oreochromis niloticus]	16.279	1.49773	0.771082	1.94237	0.0520921	1	1.0616	34.7137	12.8368	9.94404	9.65581	29.4618
C25313_c0_seq1_	PREDICTED: bleomycin hydrolase-like [Oreochromis niloticus]	148.867	-1.3877	0.714449	-1.94234	0.0520964	1	222.936	167.618	60.683	230.521	157.126	54.3202
C91504_c0_seq1_	PREDICTED: msx2-interacting protein [Oreochromis niloticus]	13.9035	1.50386	0.774318	1.94218	0.0521157	1	3.18481	18.8446	10.5028	15.3681	7.90021	27.6204
C5400_c0_seq1_	leukocyte elastase inhibitor [Oncorhynchus mykiss] gb	65.2122	1.49188	0.768353	1.94166	0.0521783	1	1.0616	14.8773	110.863	86.7843	75.4909	102.196
C562_c0_seq1_	PREDICTED: CREB-binding protein-like [Oreochromis niloticus]	32.8284	-1.50699	0.776299	-1.94125	0.0522277	1	65.8193	25.7873	15.1707	71.4163	11.4114	7.36545
C268_c159_seq1_	V-type proton ATPase 116 kDa subunit a isoform 2 [Danio rerio] emb	42.8464	1.43643	0.740108	1.94084	0.052278	1	14.8624	30.7464	73.5198	40.6802	25.4562	71.8132
C9904_c0_seq1_	Inorganic pyrophosphatase [Dicentrarchus labrax]	152.949	1.50382	0.774878	1.94072	0.0522924	1	16.9856	165.634	303.415	12.656	167.66	251.346
C95316_c0_seq1_	Spindle and kinetochore-associated protein 1 [Salmo salar] gb	2084.06	1.08776	0.560529	1.9406	0.0523067	1	1228.27	1699.98	2744.74	1613.65	2219.96	2997.74
C85299_c0_seq1_	PREDICTED: E3 ubiquitin-protein ligase SH3RF1-like [Oreochromis niloticus]	24.5566	-1.49395	0.769887	-1.94048	0.0523214	1	60.5113	20.8282	9.33585	30.7361	15.8004	10.1275
C54177_c1_seq1_	PREDICTED: alkaline ceramidase 2-like [Oreochromis niloticus]	34.5108	1.50619	0.776198	1.94048	0.0523217	1	3.18481	52.5665	14.0038	25.3121	63.2017	48.7961
C25817_c0_seq1_	PREDICTED: AMP deaminase 2 [Oreochromis niloticus]	18.8019	1.50034	0.773191	1.94045	0.0523247	1	1.0616	26.7792	21.0057	6.32802	26.334	31.3032
C10142_c0_seq1_	Ferritin, heavy subunit [Salmo salar] gb	172.469	-1.34072	0.690993	-1.94028	0.0523456	1	341.836	123.978	120.199	246.793	105.336	96.6716
C36050_c1_seq1_	PREDICTED: noelin-2-like [Oreochromis niloticus]	56.4994	-1.32861	0.684958	-1.93969	0.0524168	1	79.6201	68.4356	38.5104	75.0323	55.3014	22.0964
C12385_c1_seq1_	G patch domain and ankyrin repeats-containing protein 1 [Danio rerio] gb	132.786	-1.39078	0.717016	-1.93968	0.0524183	1	176.226	195.389	59.516	160.009	164.149	41.4307
C24020_c0_seq1_	PREDICTED: tubulin--tyrosine ligase-like protein 12-like [Oreochromis niloticus]	75.4353	-1.30078	0.670636	-1.93962	0.0524255	1	128.454	71.4111	47.8462	102.152	64.0795	38.6686
C5675_c0_seq1_	Microsomal glutathione S-transferase 3 [Oncorhynchus mykiss]	257.103	-1.36271	0.70262	-1.93947	0.0524446	1	325.912	302.505	155.208	461.946	214.183	82.8613
C22153_c4_seq1_	PREDICTED: probable phospholipid-transporting ATPase IIB-like [Oreochromis niloticus]	1058.33	1.10391	0.569187	1.93945	0.0524467	1	744.183	924.377	1107.46	776.539	953.292	1844.13
C2939_c2_seq1_	Creatine kinase, testis isozyme [Salmo salar] gb	64.4696	-1.25221	0.645711	-1.93927	0.0524685	1	85.9898	71.4111	57.1821	83.1683	61.4461	27.6204
C552918_c0_seq1_	POU domain, class 6, transcription factor 2 [Dicentrarchus labrax]	16.5989	1.47675	0.761564	1.93911	0.0524884	1	0	22.8119	19.8387	6.32802	19.3116	31.3032
C52554_c0_seq1_	PREDICTED: protein Wnt-11-like [Oreochromis niloticus]	322.641	-1.41639	0.730445	-1.93908	0.0524919	1	488.337	373.916	98.0264	472.794	394.133	108.64
C33672_c2_seq1_	PREDICTED: probable carboxypeptidase X1-like [Oreochromis niloticus]	37.1814	1.5007	0.774043	1.93878	0.0525286	1	8.49282	11.9019	79.3547	30.7361	7.90021	84.7027
C89788_c1_seq1_	protein angel homolog 2 [Danio rerio] sp	244.31	1.05302	0.543155	1.93871	0.0525365	1	132.7	278.702	261.404	208.825	272.118	312.111
C561_c103_seq1_	Cytochrome c oxidase polypeptide VIIb, mitochondrial precursor [Salmo salar]	343.941	-1.21188	0.625227	-1.93831	0.0525854	1	549.91	439.377	196.053	315.497	371.31	191.502
C31674_c0_seq1_	ras-related protein Rab-40C [Danio rerio] gb	760.178	1.28945	0.665297	1.93816	0.0526038	1	354.575	931.32	812.219	339.905	962.07	1160.98
C27517_c0_seq1_	Arfaptin-1 [Salmo salar] gb	106.31	1.23544	0.637532	1.93784	0.0526425	1	40.3409	120.01	135.37	97.6324	121.137	123.371
C63336_c0_seq1_	PREDICTED: histone-lysine N-methyltransferase MLL2-like [Oreochromis niloticus]	161.102	1.19092	0.614635	1.9376	0.0526715	1	82.8049	224.152	127.201	129.272	171.171	232.012
C67437_c2_seq1_	PREDICTED: zinc finger protein 652-like [Oreochromis niloticus]	6.82982	-1.4035	0.724492	-1.93722	0.0527185	1	22.2936	0.991821	3.50094	3.61601	9.65581	0.920682
C50568_c0_seq1_	hypothetical protein E9Q 00345 [Moraxella catarrhalis BC1]	559.051	-0.950848	0.490888	-1.937	0.0527458	1	728.259	532.608	525.141	643.65	578.471	346.176
C40446_c1_seq1_	PREDICTED: metastasis-associated protein MTA1-like [Danio rerio]	855.109	-1.00023	0.516586	-1.93623	0.052839	1	1246.32	824.203	738.699	1020.62	737.353	563.457
C138397_c3_seq1_	PREDICTED: L-fucose kinase, partial [Oreochromis niloticus]	307.761	1.24071	0.640909	1.93586	0.0528851	1	141.193	269.775	500.635	224.193	282.652	428.117
C132371_c0_seq1_	Digestive organ expansion factor [Salmo salar]	98.2225	-1.49829	0.774217	-1.93523	0.0529618	1	237.799	22.8119	22.1726	235.041	43.89	27.6204
C39503_c0_seq1_	PREDICTED: microtubule-associated serine/threonine-protein kinase 2-like [Danio rerio]	24.4299	1.48253	0.766165	1.93501	0.0529896	1	7.43121	35.7056	9.33585	21.6961	25.4562	46.9548
C28143_c1_seq1_	PREDICTED: probable ATP-dependent RNA helicase DHX37-like [Oreochromis niloticus]	58.8862	-1.46884	0.759226	-1.93465	0.0530329	1	126.331	25.7873	30.3415	102.152	44.7678	23.9377
C37978_c0_seq1_	PREDICTED: hypothetical protein LOC100701460 [Oreochromis niloticus]	24.0894	-1.50159	0.776228	-1.93447	0.0530549	1	50.9569	5.95093	45.5122	20.7921	15.8004	5.52409
C19384_c0_seq1_	PREDICTED: ankyrin repeat and zinc finger domain-containing protein 1 [Danio rerio]	89.6005	-1.12087	0.579422	-1.93446	0.0530568	1	135.885	86.2884	80.5217	84.0723	97.4359	53.3995
C50_c0_seq1_	Glyceraldehyde-3-phosphate dehydrogenase [Salmo salar]	319.165	-1.45081	0.750081	-1.9342	0.053088	1	443.75	386.81	84.0226	433.922	484.546	81.9407
C43236_c0_seq1_	uncharacterized protein LOC541512 [Danio rerio] ref	43.0238	1.46078	0.755249	1.93417	0.0530919	1	13.8008	38.681	66.5179	15.3681	48.279	75.4959
C99419_c0_seq1_	PREDICTED: epidermal growth factor receptor substrate 15-like [Oreochromis niloticus]	46.7314	-1.3015	0.672957	-1.934	0.0531132	1	82.8049	35.7056	37.3434	47.0082	52.668	24.8584
C83843_c0_seq1_	KDEL motif-containing protein 2 precursor [Salmo salar] gb	431.585	1.13534	0.587048	1.93399	0.0531148	1	188.965	467.148	581.156	461.946	395.888	494.406
C66841_c0_seq1_	PREDICTED: zinc finger MIZ domain-containing protein 1-like isoform 2 [Oreochromis niloticus]	10.3284	-1.43917	0.7444	-1.93333	0.0531957	1	30.7865	1.98364	3.50094	5.42402	18.4338	1.84136
C106756_c0_seq1_	PREDICTED: intermediate filament family orphan 1-like [Danio rerio]	9.82768	-1.49513	0.7735	-1.93294	0.0532435	1	26.54	4.9591	10.5028	5.42402	8.77801	2.76204
C831_c0_seq1_	PREDICTED: armadillo repeat-containing protein 5 [Danio rerio]	33.3034	-1.49202	0.771968	-1.93275	0.0532673	1	40.3409	29.7546	23.3396	60.5682	42.1344	3.68273
C60682_c0_seq1_	PREDICTED: nuclear fragile X mental retardation-interacting protein 1-like [Oreochromis niloticus]	7.28569	1.43528	0.742977	1.93179	0.0533855	1	1.0616	6.94275	1.16698	5.42402	7.02241	22.0964
C20929_c0_seq1_	PREDICTED: hypothetical protein LOC100699848 [Oreochromis niloticus]	1339.9	-1.07751	0.55787	-1.93147	0.0534253	1	2332.34	1088.03	1168.15	1358.72	1122.71	969.478
C131409_c0_seq1_	coiled-coil domain containing 78 [Xenopus laevis] gb	74.872	-1.32232	0.684753	-1.93109	0.0534714	1	116.776	70.4193	43.1783	77.7443	107.969	33.1445
C6584_c4_seq1_	PREDICTED: storkhead-box protein 1-like [Oreochromis niloticus]	112.381	-1.15571	0.598524	-1.93093	0.0534917	1	174.103	89.2639	129.535	123.848	92.1691	65.3684
C38166_c0_seq1_	monoacylglycerol lipase ABHD12 [Danio rerio] sp	2363.08	1.16617	0.603947	1.93092	0.0534933	1	1262.24	2304.99	2770.41	1397.59	3027.53	3415.73
C210141_c0_seq1_	PREDICTED: myosin light chain kinase, smooth muscle-like, partial [Danio rerio]	164.76	1.38209	0.715804	1.93082	0.0535057	1	55.2033	179.52	85.1896	138.313	301.086	229.25
C19991_c0_seq1_	PREDICTED: epsin-3-like [Oreochromis niloticus]	16.0344	1.49623	0.774986	1.93065	0.0535259	1	4.24641	11.9019	24.5066	14.4641	7.02241	34.0652
C72086_c0_seq1_	PREDICTED: sodium-independent sulfate anion transporter [Oreochromis niloticus]	68.6323	1.37402	0.711697	1.93063	0.0535288	1	32.9097	40.6647	102.694	46.1042	61.4461	127.975
C49503_c0_seq1_	PREDICTED: pleckstrin homology-like domain family A member 1-like [Oreochromis niloticus]	84.9674	1.38216	0.716063	1.93022	0.0535794	1	32.9097	99.1821	127.201	37.9681	78.1243	134.42
C93081_c0_seq1_	PREDICTED: AN1-type zinc finger and ubiquitin domain-containing protein 1-like [Oreochromis niloticus]	207.012	-1.34164	0.695133	-1.93005	0.0536007	1	410.84	173.569	85.1896	244.081	213.306	115.085
C73985_c0_seq1_	CA109 protein [Salmo salar] gb	66.95	-1.49818	0.776239	-1.93005	0.053601	1	79.6201	27.771	112.03	75.9363	103.58	2.76204
C87958_c0_seq1_	PREDICTED: gamma-aminobutyric acid type B receptor subunit 1-like [Oreochromis niloticus]	26.6831	-1.3945	0.722689	-1.9296	0.0536566	1	37.1561	27.771	28.0075	32.5441	26.334	8.28613
C48731_c2_seq1_	PREDICTED: CWF19-like protein 1-like [Oreochromis niloticus]	289.816	1.49223	0.773547	1.92907	0.0537221	1	30.7865	174.56	213.557	192.553	799.676	327.763
C8053_c6_seq1_	PREDICTED: E3 ubiquitin-protein ligase HUWE1 [Oreochromis niloticus]	41.716	-1.45677	0.755249	-1.92886	0.0537487	1	92.3594	29.7546	21.0057	64.1842	24.5784	18.4136
C50278_c1_seq1_	oral-facial-digital syndrome 1 protein homolog [Danio rerio] sp	40.3605	-1.40448	0.728262	-1.92854	0.0537878	1	55.2033	40.6647	28.0075	64.1842	42.1344	11.9689
C5692_c1_seq1_	PREDICTED: phosphatidylinositol-5-phosphate 4-kinase type-2 alpha-like [Oreochromis niloticus]	770.237	1.10632	0.573688	1.92844	0.0538005	1	491.522	821.228	786.545	488.162	806.699	1227.27
C142412_c0_seq1_	PREDICTED: TBC1 domain family member 2B-like [Oreochromis niloticus]	37.9332	1.4703	0.762516	1.92822	0.053828	1	1.0616	34.7137	7.00188	29.8321	87.7801	67.2098
C50854_c0_seq1_	Uridine 5-monophosphate synthase [Salmo salar] gb	4240.13	1.23512	0.640619	1.92801	0.0538535	1	1949.1	4402.69	6192	2299.78	4726.96	5870.27
C6248_c2_seq1_	tubulin polymerization-promoting protein family member 3 [Salmo salar] gb	9.09206	-1.37556	0.713556	-1.92775	0.053886	1	28.6633	1.98364	5.8349	16.2721	0.877801	0.920682
C39473_c2_seq1_	Arntl2 protein [Danio rerio]	304.416	-1.17273	0.60844	-1.92745	0.0539241	1	474.536	398.712	192.552	313.689	272.996	174.009
C23712_c1_seq1_	PREDICTED: homeobox protein AKR-like [Oreochromis niloticus]	139.438	-1.0873	0.564155	-1.92731	0.0539411	1	202.766	119.019	159.876	150.969	121.137	82.8613
C25495_c0_seq1_	PREDICTED: hypothetical protein LOC100699980 [Oreochromis niloticus]	664.605	1.04549	0.54265	1.92663	0.0540254	1	423.579	663.528	685.018	472.794	756.664	986.05
C101307_c0_seq1_	PREDICTED: solute carrier organic anion transporter family member 4A1 [Danio rerio]	745.936	-1.29	0.669644	-1.9264	0.0540541	1	1383.27	539.551	415.445	1100.17	611.827	425.355
C125378_c0_seq1_	PREDICTED: glycoprotein-N-acetylgalactosamine 3-beta-galactosyltransferase 1-like [Meleagris gallopavo]	12.8369	-1.48989	0.773546	-1.92606	0.0540972	1	22.2936	13.8855	17.5047	16.2721	6.14461	0.920682
C50339_c0_seq1_	SH3-domain GRB2-like 2-like [Danio rerio]	55.7308	-1.38057	0.716792	-1.92604	0.0540989	1	83.8665	64.4684	26.8406	69.6083	69.3463	20.255
C65291_c0_seq1_	PREDICTED: hypothetical protein LOC100497066 [Xenopus (Silurana) tropicalis]	29.9085	1.49419	0.775784	1.92604	0.0540993	1	4.24641	45.6238	42.0113	8.13603	32.4786	46.9548
C410885_c0_seq1_	LOC567806 protein [Danio rerio]	56.3354	1.23918	0.643414	1.92594	0.0541118	1	26.54	67.4438	64.1839	47.9122	50.9124	81.02
C1394_c0_seq1_	Cytochrome c oxidase subunit 4 isoform 1, mitochondrial precursor [Oncorhynchus mykiss]	142.886	-1.31868	0.684703	-1.92592	0.0541145	1	216.567	137.863	72.3528	217.865	150.982	61.6857
C11074_c1_seq1_	Cyclin-dependent kinase inhibitor 1C [Salmo salar]	165.907	-1.384	0.718649	-1.92584	0.054124	1	264.339	163.65	66.5179	280.241	156.249	64.4477
C58413_c1_seq1_	PREDICTED: vacuolar protein sorting-associated protein 13C-like [Oreochromis niloticus]	121.331	-1.19396	0.619978	-1.9258	0.0541291	1	149.686	157.7	108.529	113	146.593	52.4788
C121465_c0_seq1_	PREDICTED: protein KIAA0284-like [Oreochromis niloticus]	143.264	1.18288	0.614316	1.92552	0.054164	1	88.113	132.904	161.043	94.0164	140.448	243.06
C43798_c2_seq1_	activating signal cointegrator 1 complex subunit 2 [Salmo salar] gb	142.399	-1.28898	0.669454	-1.92542	0.0541767	1	165.61	161.667	112.03	220.577	145.715	48.7961
C16572_c1_seq1_	Translation initiation factor eIF-2B subunit beta [Salmo salar] gb	96.3523	-1.34109	0.696525	-1.9254	0.0541798	1	146.501	75.3784	58.349	159.105	99.1915	39.5893
C82744_c0_seq1_	PREDICTED: prolyl 3-hydroxylase 2 [Danio rerio]	70.7676	1.23073	0.639302	1.92511	0.0542153	1	40.3409	54.5501	75.8537	56.0482	78.1243	119.689
C9929_c2_seq1_	Death-inducer obliterator 1 [Dicentrarchus labrax]	187.923	-1.15356	0.599366	-1.92463	0.0542761	1	244.168	172.577	238.064	233.233	148.348	91.1475
C161050_c0_seq1_	PREDICTED: kinesin-like protein KIF15-A-like [Oreochromis niloticus]	139.708	1.26905	0.659476	1.92433	0.0543138	1	76.4353	138.855	178.548	75.0323	128.159	241.219
C51423_c0_seq1_	Alpha-1,3-mannosyl-glycoprotein 2-beta-N-acetylglucosaminyltransferase [Salmo salar] gb	101.644	1.49028	0.775148	1.92257	0.0545341	1	27.6016	27.771	253.235	25.3121	43.0122	232.932
C70977_c0_seq1_	PREDICTED: CDK-activating kinase assembly factor MAT1-like [Oreochromis niloticus]	1052.54	-1.13987	0.593019	-1.92214	0.0545877	1	1373.71	1135.63	702.522	1412.05	1168.35	522.947
C43282_c0_seq1_	PREDICTED: kelch-like 13-like [Danio rerio]	220.544	-1.33829	0.696489	-1.92148	0.0546714	1	416.148	175.552	91.0245	289.281	235.251	116.006
C14751_c11_seq1_	sulfotransferase family 3, cytosolic sulfotransferase 2 [Danio rerio] emb	42.8468	1.42324	0.740764	1.92131	0.0546922	1	13.8008	65.4602	57.1821	26.2161	27.2118	67.2098
C65513_c0_seq1_	P3 protein precursor [Salmo salar] gb	179.45	-1.22412	0.637217	-1.92105	0.0547257	1	269.647	146.789	145.873	277.529	145.715	91.1475
C55189_c0_seq1_	PREDICTED: zinc finger protein Rlf [Danio rerio]	74.5473	-1.20586	0.6279	-1.92046	0.0547992	1	118.899	58.5174	63.017	74.1283	91.2913	41.4307
C276159_c0_seq1_	Interferon regulatory factor 2 [Esox lucius]	26.9826	-1.47411	0.767644	-1.92031	0.0548192	1	54.1417	34.7137	2.33396	42.4882	25.4562	2.76204
C18685_c0_seq1_	myosin light chain kinase, smooth muscle [Gallus gallus] sp	3838.8	0.97478	0.507817	1.91955	0.0549148	1	2414.08	3969.27	3206.86	3491.26	4737.49	5213.82
C14013_c0_seq1_	Vacuolar protein sorting-associated protein 35 [Salmo salar]	69.7382	-1.29362	0.673955	-1.91944	0.0549283	1	82.8049	67.4438	70.0188	75.0323	99.1915	23.9377
C52470_c0_seq1_	PREDICTED: bone morphogenetic protein receptor type-2-like [Oreochromis niloticus]	37.701	-1.40964	0.734546	-1.91906	0.0549769	1	59.4497	33.7219	21.0057	58.7602	40.3788	12.8895
C106988_c0_seq1_	Wilms tumor 1 associated protein-like [Salmo salar] gb	198.825	1.1491	0.598794	1.91902	0.0549818	1	129.515	150.757	204.222	150.065	216.817	341.573
C32736_c1_seq1_	cell wall surface anchor family protein [Streptococcus agalactiae CJB111] gb	161.386	1.19129	0.620789	1.91899	0.054986	1	99.7906	152.74	194.886	109.384	132.548	278.966
C32088_c0_seq1_	Integral membrane protein DGCR2/IDD [Salmo salar] gb	62.8957	-1.29127	0.673102	-1.91839	0.055062	1	95.5442	87.2802	64.1839	60.5682	41.2566	28.5411
C4101_c0_seq1_	PREDICTED: protocadherin Fat 1 [Oreochromis niloticus]	31.6105	-1.45146	0.756718	-1.9181	0.0550981	1	85.9898	4.9591	5.8349	73.2243	12.2892	7.36545
C15718_c1_seq1_	PREDICTED: S phase cyclin A-associated protein in the endoplasmic reticulum [Oreochromis niloticus]	82.1971	-1.16725	0.608599	-1.91793	0.0551205	1	106.16	100.174	78.1877	80.4563	89.5357	38.6686
C5746_c2_seq1_	PREDICTED: putative deoxyribonuclease TATDN1-like [Oreochromis niloticus]	29.9369	1.45454	0.758489	1.91768	0.0551514	1	13.8008	38.681	23.3396	16.2721	17.556	69.9718
C827_c12_seq1_	FBPL4 [Oncorhynchus mykiss] gb	2420.21	1.35302	0.70574	1.91717	0.0552166	1	957.565	2977.45	2783.25	820.835	3322.48	3659.71
C27602_c0_seq1_	PREDICTED: e3 ubiquitin-protein ligase UBR2 [Danio rerio]	532.941	-1.09383	0.570589	-1.91703	0.0552344	1	782.401	465.164	420.113	731.339	481.913	316.714
C92852_c0_seq1_	PREDICTED: sugar phosphate exchanger 3-like [Oreochromis niloticus]	350.195	1.09189	0.569595	1.91695	0.0552437	1	185.78	357.056	485.464	298.321	315.13	459.42
C71215_c1_seq1_	PREDICTED: hypothetical protein LOC558606 [Danio rerio]	565.621	-1.04159	0.543497	-1.91647	0.0553057	1	777.093	731.964	444.62	538.786	567.059	334.207
C90277_c0_seq1_	PREDICTED: hypothetical protein LOC100691356 [Oreochromis niloticus]	423.047	1.12641	0.587812	1.91628	0.0553301	1	242.045	380.859	602.162	331.769	358.143	623.301
C56188_c0_seq1_	PREDICTED: uncharacterized protein C9orf82 homolog [Danio rerio]	133.365	-1.39183	0.726333	-1.91625	0.0553336	1	221.875	108.108	79.3547	256.737	81.6355	52.4788
C79675_c0_seq1_	PREDICTED: transcription factor E2F7-like [Oreochromis niloticus]	77.2656	-1.36183	0.710826	-1.91585	0.0553847	1	144.378	58.5174	35.0094	94.0164	93.9247	37.7479
C49690_c2_seq1_	PREDICTED: metastasis-associated protein MTA1-like [Oreochromis niloticus]	167.705	-1.13126	0.59048	-1.91584	0.0553857	1	250.538	156.708	130.702	222.385	149.226	96.6716
C163876_c0_seq1_	PREDICTED: zinc finger protein 658-like, partial [Anolis carolinensis]	127.782	1.12522	0.587328	1.91583	0.0553872	1	78.5585	105.133	129.535	148.257	103.58	201.629
C57440_c0_seq1_	PREDICTED: dedicator of cytokinesis protein 7 [Danio rerio]	371.381	1.19058	0.621455	1.9158	0.0553903	1	213.382	339.203	530.976	252.217	294.063	598.443
C37244_c0_seq1_	Mitochondrial 39S ribosomal protein L27 [Salmo salar]	525.712	-1.0647	0.555859	-1.91541	0.0554407	1	747.368	555.42	368.766	530.65	639.039	313.032
C83044_c1_seq1_	PREDICTED: dihydroxyacetone phosphate acyltransferase-like [Oreochromis niloticus]	49.6166	-1.48537	0.77565	-1.915	0.055492	1	94.4826	24.7955	14.0038	111.192	41.2566	11.9689
C50083_c0_seq1_	PREDICTED: uncharacterized protein C12orf4 homolog [Oreochromis niloticus]	73.1126	1.2383	0.646837	1.9144	0.0555694	1	33.9713	90.2557	50.1802	76.8403	83.3911	104.037
C15769_c0_seq1_	C1orf174 [Salmo salar]	248.304	1.01461	0.530011	1.91432	0.0555793	1	138.008	289.612	266.072	224.193	259.829	312.111
C37215_c0_seq1_	Probable low affinity copper uptake protein 2 [Salmo salar] gb	291.467	0.959265	0.501164	1.91408	0.0556105	1	182.596	296.554	316.252	257.641	307.23	388.528
C47624_c0_seq1_	Death-inducer obliterator 1 [Dicentrarchus labrax]	123.91	-1.08538	0.567074	-1.91401	0.0556188	1	184.719	99.1821	120.199	139.217	124.648	75.4959
C6100_c2_seq1_	zinc finger matrin-type protein 5 [Salmo salar] gb	149.05	-1.31212	0.685637	-1.91373	0.0556548	1	216.567	177.536	68.8519	185.321	184.338	61.6857
C11853_c0_seq1_	protein tyrosine phosphatase, non-receptor type 11, b [Danio rerio] gb	60.4712	1.40792	0.735702	1.9137	0.055658	1	13.8008	95.2148	64.1839	39.7762	79.8799	69.9718
C10605_c0_seq1_	calpastatin long [Oncorhynchus mykiss] gb	147.324	-1.22285	0.639043	-1.91356	0.0556766	1	226.121	148.773	92.1915	207.017	133.426	76.4166
C29269_c1_seq1_	PREDICTED: hypothetical protein LOC335281 [Danio rerio]	163.729	-1.19092	0.622516	-1.91307	0.055739	1	199.581	177.536	126.034	218.769	190.483	69.9718
C32677_c1_seq1_	PREDICTED: suppressor of SWI4 1 homolog [Oreochromis niloticus]	32.4883	1.48266	0.775098	1.91287	0.0557648	1	8.49282	20.8282	70.0188	14.4641	16.6782	64.4477
C5251_c1_seq1_	signal sequence receptor beta [Salmo salar] gb	529.949	-1.21255	0.63393	-1.91275	0.0557798	1	885.376	483.017	350.094	769.307	386.232	305.666
C15360_c0_seq1_	Polyadenylate-binding protein-interacting protein 2B [Salmo salar] gb	137.666	-1.05771	0.552992	-1.9127	0.0557864	1	192.15	147.781	128.368	157.297	119.381	81.02
C25090_c0_seq1_	m-calpain [Oncorhynchus mykiss] dbj	4.12134	1.33049	0.695817	1.91213	0.0558598	1	0	2.97546	3.50094	1.80801	2.6334	13.8102
C18992_c0_seq1_	Probable aminopeptidase NPEPL1 [Salmo salar] gb	226.492	-1.31987	0.690359	-1.91186	0.055894	1	269.647	290.604	127.201	335.385	262.462	73.6545
C31364_c0_seq1_	PREDICTED: histone-lysine N-methyltransferase MLL2-like [Oreochromis niloticus]	31.4595	1.47196	0.76994	1.91178	0.0559038	1	9.55442	49.591	9.33585	22.6001	35.9898	61.6857
C38682_c1_seq1_	PREDICTED: voltage-dependent calcium channel gamma-6 subunit-like [Oreochromis niloticus]	33.9786	-1.40521	0.735385	-1.91084	0.0560248	1	64.7577	31.7383	21.0057	48.8162	22.8228	14.7309
C57810_c1_seq1_	PREDICTED: AT-rich interactive domain-containing protein 1B-like [Oreochromis niloticus]	498.161	-0.993325	0.519957	-1.9104	0.0560819	1	712.335	445.328	409.61	589.41	509.124	323.159
C8877_c0_seq1_	PREDICTED: ras GTPase-activating protein-binding protein 2-like [Oreochromis niloticus]	198.607	-1.36885	0.716655	-1.91005	0.0561263	1	389.608	202.331	63.017	214.249	222.084	100.354
C326101_c0_seq1_	PREDICTED: collagen alpha-1(XIX) chain [Canis lupus familiaris]	43.1481	1.40824	0.737477	1.90954	0.0561928	1	13.8008	52.5665	67.6849	22.6001	36.8676	65.3684
C63976_c0_seq1_	PREDICTED: alpha-ketoglutarate-dependent dioxygenase FTO-like [Oreochromis niloticus]	89.4073	-1.32304	0.692877	-1.90948	0.0562001	1	109.345	110.092	56.0151	113.904	117.625	29.4618
C13557_c0_seq1_	S100-A1 [Salmo salar]	409.17	-1.38473	0.725186	-1.90948	0.0562007	1	599.805	436.401	130.702	574.042	573.204	140.864
C15822_c0_seq1_	Alanyl-tRNA synthetase, cytoplasmic [Salmo salar] gb	209.974	-1.23833	0.648591	-1.90926	0.056229	1	342.897	186.462	115.531	289.281	212.428	113.244
C7308_c3_seq1_	nucleoside diphosphate-linked moiety X motif 17 [Danio rerio] sp	10.0111	-1.46136	0.76546	-1.90913	0.0562451	1	25.4784	8.92639	2.33396	14.4641	7.02241	1.84136
C20141_c0_seq1_	CREB/ATF bZIP transcription factor [Salmo salar]	51.5151	-1.46563	0.767787	-1.9089	0.0562747	1	99.7906	33.7219	23.3396	107.576	28.0896	16.5723
C35477_c0_seq1_	PREDICTED: myosin-X [Danio rerio]	8.04395	-1.41841	0.743048	-1.9089	0.0562749	1	19.1088	10.91	9.33585	4.52002	4.389	0
C80344_c0_seq1_	HD domain-containing protein 2 [Danio rerio] sp	262.058	1.18123	0.61882	1.90884	0.0562821	1	127.392	230.102	361.764	179.897	316.886	356.304
C21891_c1_seq1_	PREDICTED: cAMP-specific 3',5'-cyclic phosphodiesterase 4B-like [Oreochromis niloticus]	45.5458	-1.43735	0.753044	-1.90872	0.0562978	1	80.6817	55.542	17.5047	71.4163	32.4786	15.6516
C34515_c2_seq1_	PREDICTED: fibronectin type-III domain-containing protein 3A [Oreochromis niloticus]	675.345	-1.06753	0.559301	-1.90868	0.0563032	1	1098.76	538.559	562.485	809.987	582.86	459.42
C27168_c0_seq1_	WD repeat-containing protein 68 [Salmo salar]	1287.29	-1.0486	0.549445	-1.90848	0.0563294	1	1873.73	1568.07	913.746	1413.86	1155.19	799.152
C14114_c1_seq1_	KIAA0652 [Salmo salar]	37.9381	-1.42412	0.746279	-1.90829	0.0563536	1	80.6817	25.7873	25.6736	56.0482	21.945	17.4929
C43101_c0_seq1_	polypyrimidine tract binding protein-like [Danio rerio]	100.159	-1.39555	0.73165	-1.9074	0.0564682	1	161.363	134.888	32.6755	119.328	115.87	36.8273
C46944_c0_seq1_	Programmed cell death protein 2 [Osmerus mordax]	10.6604	1.22316	0.641276	1.90738	0.0564713	1	1.0616	0.991821	1.16698	0	19.3116	41.4307
C94125_c0_seq1_	Rho GTPase-activating protein 21 [Dicentrarchus labrax]	29.9717	-1.39336	0.730522	-1.90734	0.056476	1	48.8337	26.7792	37.3434	18.0801	37.7454	11.0482
C23845_c0_seq1_	unnamed protein product [Tetraodon nigroviridis]	62.6557	1.48066	0.776303	1.90732	0.0564787	1	2.1232	61.4929	87.5235	46.1042	111.481	67.2098
C120095_c1_seq1_	PREDICTED: bifunctional heparan sulfate N-deacetylase/N-sulfotransferase 1-like [Danio rerio]	439.05	1.0619	0.556781	1.90721	0.0564935	1	291.941	457.229	499.468	355.273	336.198	694.194
C186536_c0_seq1_	forkhead box N4 [Danio rerio] emb	174.186	-1.10426	0.579005	-1.90717	0.0564982	1	265.4	143.814	161.043	222.385	146.593	105.878
C52154_c0_seq1_	PREDICTED: 1-phosphatidylinositol-4,5-bisphosphate phosphodiesterase beta-4 [Xenopus (Silurana) tropicalis]	48.0986	1.24745	0.654113	1.90708	0.0565097	1	27.6016	46.6156	39.6773	46.1042	43.89	84.7027
C37573_c0_seq1_	PREDICTED: calcium homeostasis endoplasmic reticulum protein-like [Oreochromis niloticus]	520.435	-0.994729	0.521604	-1.90706	0.0565131	1	692.164	491.943	473.794	666.251	485.424	313.032
C230548_c0_seq1_	unnamed protein product [Tetraodon nigroviridis]	14.7911	1.46558	0.768632	1.90674	0.0565542	1	4.24641	8.92639	14.0038	18.9841	14.0448	28.5411
C63072_c1_seq1_	High affinity cAMP-specific 3',5'-cyclic phosphodiesterase 7A [Dicentrarchus labrax]	786.184	-1.08881	0.571107	-1.90649	0.0565861	1	1117.87	729.98	543.813	1032.37	839.178	453.896
C11132_c0_seq1_	chromodomain-helicase-DNA-binding protein 1-like [Danio rerio] sp	17.4049	1.44444	0.757645	1.90648	0.0565878	1	5.30801	12.8937	18.6717	0.904003	11.4114	55.2409
C85229_c0_seq1_	PREDICTED: LOW QUALITY PROTEIN: zinc finger protein 729 isoform 4 [Mus musculus]	32.7679	1.33619	0.700916	1.90635	0.056605	1	3.18481	1.98364	92.1915	5.42402	1.7556	92.0682
C111201_c0_seq1_	PREDICTED: zinc finger protein 345-like [Saccoglossus kowalevskii]	20.4986	1.46109	0.766604	1.90592	0.0566604	1	4.24641	9.91821	39.6773	2.71201	15.8004	50.6375
C9515_c0_seq1_	PREDICTED: probable E3 ubiquitin-protein ligase TRIP12 [Oreochromis niloticus]	74.6031	-1.2976	0.680847	-1.90587	0.0566676	1	127.392	51.5747	100.36	82.2643	48.279	37.7479
C74536_c0_seq1_	PREDICTED: ras-GEF domain-containing family member 1B-B-like [Oreochromis niloticus]	18.6432	-1.44704	0.759311	-1.90573	0.0566855	1	28.6633	18.8446	22.1726	24.4081	13.167	4.60341
C106363_c0_seq1_	PREDICTED: hypothetical protein LOC100333297 [Danio rerio]	44.3325	1.41248	0.741328	1.90534	0.0567364	1	13.8008	59.5093	18.6717	50.6242	56.1792	67.2098
C106152_c0_seq1_	interferon-inducible protein 56 [Larimichthys crocea]	24.3472	1.44404	0.757974	1.90513	0.0567634	1	1.0616	13.8855	49.0132	30.7361	3.5112	47.8754
C6282_c0_seq1_	NADH dehydrogenase iron-sulfur protein 7, mitochondrial precursor [Salmo salar] gb	878.355	-1.04498	0.548607	-1.90479	0.0568071	1	1216.6	868.835	657.01	1149.89	857.611	520.185
C123_c24_seq1_	PREDICTED: hypothetical protein LOC100425525, partial [Macaca mulatta]	94.5035	-1.39038	0.730463	-1.90342	0.0569861	1	200.643	54.5501	56.0151	146.449	60.5683	48.7961
C135427_c0_seq1_	myosin Va [Oncorhynchus mykiss]	29.2267	1.44786	0.7608	1.90307	0.0570309	1	2.1232	56.5338	2.33396	35.2561	20.1894	58.9236
C54725_c1_seq1_	unnamed protein product [Tetraodon nigroviridis]	105.464	-1.37652	0.723427	-1.90278	0.0570699	1	145.439	161.667	50.1802	152.777	88.6579	34.0652
C421629_c0_seq1_	PREDICTED: uncharacterized protein C2orf65-like [Oreochromis niloticus]	34.1543	1.46617	0.770566	1.90271	0.0570778	1	4.24641	27.771	37.3434	67.8003	26.334	41.4307
C11189_c0_seq1_	pre-mRNA processing factor 8 [Danio rerio]	6702.57	0.872664	0.4587	1.90247	0.0571092	1	4671.05	7012.17	7217.78	6130.95	6058.58	9124.87
C42108_c0_seq1_	novel protein similar to human and mouse coiled-coil and C2 domain containing 1A (CC2D1A) [Danio rerio] emb	550.361	1.22081	0.641748	1.90232	0.0571295	1	293.002	506.82	386.271	384.201	865.512	866.361
C13024_c1_seq1_	unnamed protein product [Tetraodon nigroviridis]	78.4776	1.46493	0.770098	1.90227	0.0571361	1	18.0472	88.2721	74.6868	17.1761	147.471	125.213
C43084_c0_seq1_	Peroxisomal bifunctional enzyme [Salmo salar] gb	252.527	1.35383	0.711721	1.9022	0.0571455	1	90.2362	373.916	259.07	99.4404	336.198	356.304
C134530_c0_seq1_	PREDICTED: zinc finger FYVE domain-containing protein 1-like [Oreochromis niloticus]	16.7034	1.46502	0.770193	1.90215	0.0571512	1	0	18.8446	24.5066	12.656	18.4338	25.7791
C183848_c0_seq1_	TGF-beta receptor type-1, partial [Macaca mulatta] gb	128.546	1.27846	0.672124	1.90212	0.0571557	1	77.4969	116.043	157.542	74.1283	96.5581	249.505
C90119_c0_seq1_	PREDICTED: hypothetical protein LOC561960 [Danio rerio]	7.96759	-1.37272	0.721792	-1.90182	0.057195	1	24.4168	0.991821	3.50094	14.4641	3.5112	0.920682
C34530_c0_seq1_	unnamed protein product [Tetraodon nigroviridis]	52.9684	1.33496	0.702066	1.90147	0.0572406	1	16.9856	58.5174	80.5217	54.2402	41.2566	66.2891
C13972_c0_seq1_	unnamed protein product [Tetraodon nigroviridis]	237.609	-1.03486	0.544244	-1.90146	0.0572417	1	330.158	247.955	180.882	269.393	254.562	142.706
C163311_c0_seq1_	PREDICTED: tensin-like C1 domain-containing phosphatase [Oreochromis niloticus]	21.5955	1.46761	0.771896	1.90131	0.0572614	1	3.18481	35.7056	24.5066	23.5041	12.2892	30.3825
C12273_c0_seq1_	novel protein similar to MPEG1, macrophage expressed gene 1 (MPEG1, zgc:66409) [Danio rerio]	33.4355	-1.44549	0.760389	-1.90098	0.0573041	1	67.9425	38.681	2.33396	68.7043	20.1894	2.76204
C100949_c0_seq1_	novel protein similar to vertebrate polymerase (DNA directed) sigma (POLS) [Danio rerio]	7088.94	0.945328	0.497365	1.90067	0.0573448	1	4988.47	6808.85	6705.47	5661.77	7904.6	10464.5
C16298_c0_seq1_	PREDICTED: protein KIAA1199-like [Danio rerio]	490.678	1.08395	0.57047	1.9001	0.0574199	1	308.926	444.336	645.34	378.777	410.811	755.88
C22088_c1_seq1_	PREDICTED: uncharacterized protein KIAA1310 homolog [Oreochromis niloticus]	117.09	1.29015	0.679197	1.89953	0.0574953	1	52.0185	69.4275	182.049	129.272	93.9247	175.85
C11899_c4_seq1_	unnamed protein product [Tetraodon nigroviridis]	190.275	-1.024	0.539102	-1.89945	0.0575053	1	291.941	207.291	176.214	160.913	177.316	127.975
C75243_c0_seq1_	PREDICTED: SH3 domain-containing protein 19-like [Oreochromis niloticus]	180.287	-1.09438	0.576158	-1.89944	0.0575063	1	296.187	185.47	141.205	193.457	145.715	119.689
C89859_c0_seq1_	Methylmalonic aciduria and homocystinuria type C homolog [Salmo salar] gb	573.66	-1.21558	0.64	-1.89935	0.0575184	1	838.665	462.189	340.758	844.339	671.518	284.491
C55889_c1_seq1_	PREDICTED: dedicator of cytokinesis protein 7 [Oreochromis niloticus]	387.449	1.20458	0.634269	1.89917	0.0575423	1	222.936	374.908	549.648	243.177	292.308	641.715
C112649_c0_seq1_	PREDICTED: diphthamide biosynthesis protein 1-like [Oreochromis niloticus]	23.308	1.42916	0.75256	1.89906	0.0575566	1	7.43121	28.7628	30.3415	12.656	21.0672	39.5893
C3529_c0_seq1_	PREDICTED: fas-binding factor 1 homolog [Oreochromis niloticus]	53.4954	-1.45748	0.767549	-1.89887	0.0575812	1	73.2505	70.4193	16.3377	85.8803	64.9573	10.1275
C15510_c0_seq1_	PREDICTED: hypothetical protein LOC100697905 [Oreochromis niloticus]	114.113	1.05954	0.558029	1.89873	0.0576004	1	1.0616	0.991821	46.6792	75.9363	14.0448	545.964
C50960_c1_seq1_	PREDICTED: protein cordon-bleu [Danio rerio]	594.646	1.20096	0.632566	1.89856	0.0576224	1	290.879	759.735	700.188	317.305	660.106	839.662
C89890_c0_seq1_	Pleckstrin homology-like domain family B member 2, partial [Dicentrarchus labrax]	177.184	1.41538	0.745694	1.89807	0.057687	1	26.54	152.74	254.402	170.857	300.208	158.357
C97431_c0_seq1_	PREDICTED: sodium/bile acid cotransporter 7-like [Oreochromis niloticus]	82.1584	1.19135	0.627827	1.89758	0.057751	1	37.1561	91.2475	82.8556	67.8003	107.092	106.799
C176_c0_seq1_	Calponin-1 [Salmo salar] gb	349.905	-1.45638	0.767502	-1.89755	0.0577552	1	414.025	562.362	85.1896	405.898	576.715	55.2409
C39200_c0_seq1_	Tartrate-resistant acid phosphatase type 5 precursor [Salmo salar] gb	1341.09	-0.868768	0.457874	-1.8974	0.0577757	1	1709.18	1317.14	1282.51	1498.84	1361.47	877.409
C55920_c2_seq1_	unnamed protein product [Tetraodon nigroviridis]	498.65	-1.10355	0.581657	-1.89725	0.0577952	1	719.766	536.575	311.584	575.85	561.792	286.332
C45647_c0_seq1_	potential DNA-binding protein C17orf49 homolog [Salmo salar] gb	117.811	-1.41702	0.747057	-1.89681	0.0578534	1	178.349	139.847	36.1764	201.593	114.992	35.9066
C63530_c2_seq1_	PREDICTED: protein turtle homolog A [Oreochromis niloticus]	24.9028	-1.47169	0.775938	-1.89667	0.0578721	1	43.5257	20.8282	40.8443	5.42402	35.112	3.68273
C35017_c2_seq1_	PREDICTED: protein VPRBP-like [Danio rerio]	792.418	-0.937258	0.49422	-1.89644	0.057902	1	1019.14	774.612	713.025	960.052	798.799	488.882
C30329_c3_seq1_	PREDICTED: thioredoxin domain-containing protein 16-like [Danio rerio]	154.031	-1.30269	0.686939	-1.89638	0.0579104	1	250.538	99.1821	106.195	260.353	135.181	72.7338
C67237_c2_seq1_	hypothetical protein LOAG 14640 [Loa loa] gb	9.12457	-1.43587	0.757563	-1.89538	0.0580419	1	25.4784	8.92639	2.33396	12.656	3.5112	1.84136
C156220_c0_seq1_	PREDICTED: SH3 domain and tetratricopeptide repeats-containing protein 1 [Monodelphis domestica]	3.9542	-1.19976	0.633001	-1.89535	0.0580454	1	18.0472	2.97546	0	0.904003	0.877801	0.920682
C56814_c0_seq1_	Sperm flagellar protein 1 [Salmo salar] gb	124.617	-1.46922	0.77523	-1.8952	0.0580659	1	214.444	72.4029	22.1726	281.145	129.915	27.6204
C104809_c0_seq1_	PREDICTED: mastermind-like domain-containing protein 1-like [Meleagris gallopavo]	27.5643	-1.4686	0.775177	-1.89454	0.058154	1	36.0945	49.591	16.3377	34.3521	28.0896	0.920682
C20930_c1_seq1_	PREDICTED: hypothetical protein LOC100003721 [Danio rerio]	124.771	-1.22655	0.647632	-1.8939	0.058238	1	185.78	98.1903	105.028	194.361	103.58	61.6857
C41676_c0_seq1_	PREDICTED: kinesin-like protein KIF3B isoform 2 [Oreochromis niloticus]	220.9	1.25643	0.663416	1.89387	0.058242	1	71.1273	220.184	302.248	192.553	306.352	232.932
C29561_c0_seq1_	uncharacterized protein LOC777612 [Danio rerio] gb	842.124	0.89916	0.474803	1.89375	0.0582577	1	580.696	840.072	854.23	715.971	897.112	1164.66
C6802_c0_seq1_	transcription elongation factor B (SIII), polypeptide 1 (15kDa, elongin C) [synthetic construct] gb	296.607	-1.39547	0.737089	-1.89322	0.0583291	1	419.333	333.252	88.6905	459.234	387.988	91.1475
C11932_c2_seq1_	secretory carrier-associated membrane protein 3 [Danio rerio] gb	8.3187	1.45622	0.769263	1.893	0.0583577	1	1.0616	10.91	7.00188	8.13603	4.389	18.4136
C181006_c0_seq1_	PREDICTED: multiple epidermal growth factor-like domains protein 6-like [Oreochromis niloticus]	22.3696	1.46868	0.775998	1.89264	0.0584057	1	1.0616	32.7301	32.6755	21.6961	18.4338	27.6204
C47808_c0_seq1_	PREDICTED: ankyrin repeat domain-containing protein 11 [Oreochromis niloticus]	49.675	1.34123	0.708716	1.89247	0.058428	1	21.232	48.5992	52.5141	26.2161	68.4685	81.02
C179611_c0_seq1_	PREDICTED: WD repeat, SAM and U-box domain-containing protein 1-like [Oreochromis niloticus]	39.7094	-1.44486	0.76349	-1.89244	0.0584318	1	73.2505	16.861	26.8406	75.9363	32.4786	12.8895
C101407_c0_seq1_	Cyclin-dependent kinase inhibitor 1C [Salmo salar] gb	4.96803	-1.34722	0.711903	-1.89243	0.0584343	1	14.8624	1.98364	5.8349	3.61601	3.5112	0
C6318_c0_seq1_	GABARAPL2 protein [Salmo salar]	53.6725	-1.38857	0.733816	-1.89226	0.058456	1	65.8193	61.4929	57.1821	89.4963	34.2342	13.8102
C104608_c0_seq1_	protein SHQ1 homolog [Salmo salar] gb	359.708	-1.31015	0.692377	-1.89225	0.0584581	1	636.961	285.644	191.385	602.97	258.073	183.216
C76069_c0_seq1_	PREDICTED: uncharacterized protein At3g58460-like [Danio rerio]	101.728	1.20941	0.639143	1.89223	0.0584601	1	47.7721	114.059	138.871	69.6083	99.1915	140.864
C113575_c0_seq1_	PREDICTED: methyl-CpG-binding domain protein 4-like [Oreochromis niloticus]	66.1805	1.36345	0.720559	1.89221	0.0584626	1	24.4168	41.6565	52.5141	119.328	58.8126	100.354
C14847_c0_seq1_	PREDICTED: protein FAM176B-like [Oreochromis niloticus]	23.7833	-1.39228	0.735828	-1.89213	0.0584736	1	56.2649	26.7792	1.16698	47.9122	9.65581	0.920682
C95520_c2_seq1_	proteasome activator complex subunit 4 [Danio rerio] gb	179.064	-1.34642	0.711639	-1.892	0.0584907	1	246.292	152.74	85.1896	302.841	224.717	62.6063
C19341_c0_seq1_	PREDICTED: erlin-1-like [Oreochromis niloticus]	166.867	-1.46869	0.776293	-1.89192	0.058501	1	212.32	162.659	29.1745	225.097	358.143	13.8102
C73033_c0_seq1_	PREDICTED: pyruvate dehydrogenase E1 component subunit alpha, somatic form, mitochondrial-like [Oreochromis niloticus]	19.0192	-1.46777	0.775928	-1.89163	0.0585397	1	37.1561	8.92639	10.5028	40.6802	13.167	3.68273
C70038_c1_seq1_	Prolyl 3-hydroxylase 1 [Dicentrarchus labrax]	3.47729	-1.07481	0.568229	-1.89151	0.0585558	1	18.0472	0.991821	0	0.904003	0	0.920682
C11995_c3_seq1_	PREDICTED: solute carrier family 40 member 1-like [Oreochromis niloticus]	47.0653	-1.45896	0.771329	-1.89149	0.0585594	1	107.222	10.91	19.8387	119.328	14.0448	11.0482
C156213_c0_seq1_	PREDICTED: UDP-N-acetylglucosamine/UDP-glucose/GDP-mannose transporter-like [Oreochromis niloticus]	441.872	0.975118	0.515678	1.89094	0.058632	1	314.234	434.418	451.622	358.889	411.689	680.384
C29835_c0_seq1_	unnamed protein product [Tetraodon nigroviridis]	88.9494	-1.07301	0.567455	-1.89091	0.0586364	1	131.639	94.223	81.6886	83.1683	88.6579	54.3202
C48315_c1_seq1_	PREDICTED: ras-related protein Rab-4B-like [Oreochromis niloticus]	872.389	1.04809	0.554282	1.8909	0.0586374	1	533.986	894.622	688.519	712.355	1149.04	1255.81
C75053_c0_seq1_	PREDICTED: cyclin-D-binding Myb-like transcription factor 1-like [Oreochromis niloticus]	120.702	-1.20484	0.637293	-1.89056	0.0586826	1	171.98	147.781	79.3547	158.201	107.969	58.9236
C104824_c0_seq1_	novel protein with a PTB domain (IRS-1 type) [Danio rerio]	8.06028	-1.44896	0.766483	-1.89041	0.0587036	1	18.0472	8.92639	3.50094	9.94404	7.02241	0.920682
C7108_c0_seq1_	Glutathione S-transferase Mu 3 [Esox lucius]	491.854	-1.26807	0.670831	-1.8903	0.0587178	1	825.926	461.197	276.574	785.579	344.976	256.87
C104772_c0_seq1_	PREDICTED: apoptosis-stimulating of p53 protein 2-like [Oreochromis niloticus]	364.647	1.3289	0.703052	1.89019	0.0587331	1	158.179	358.047	600.995	146.449	342.342	581.871
C13981_c0_seq1_	hypothetical protein EGM 04931, partial [Macaca fascicularis]	497.7	-1.23306	0.652393	-1.89006	0.0587504	1	732.505	643.692	238.064	550.538	581.104	240.298
C13879_c0_seq1_	RNA-binding protein with multiple splicing [Salmo salar] gb	416.387	-1.07251	0.567659	-1.88935	0.0588448	1	636.961	447.311	276.574	480.026	394.133	263.315
C32024_c0_seq1_	PREDICTED: leucine-rich repeat-containing protein 68-like [Oreochromis niloticus]	507.825	1.10373	0.584283	1.88903	0.0588877	1	342.897	534.591	562.485	365.217	381.843	859.917
C146278_c0_seq1_	selenoprotein X, 1b [Danio rerio]	82.6276	1.28186	0.678723	1.88863	0.0589411	1	31.8481	123.978	87.5235	54.2402	89.5357	108.64
C31753_c1_seq1_	PREDICTED: biotin--protein ligase-like [Oreochromis niloticus]	200.715	-1.16024	0.614384	-1.88847	0.0589629	1	300.433	172.577	154.041	294.705	172.049	110.482
C19036_c1_seq1_	PREDICTED: transmembrane protein 41A-A-like [Oreochromis niloticus]	52.4374	-1.46033	0.773458	-1.88805	0.059019	1	84.9282	69.4275	9.33585	71.4163	68.4685	11.0482
C129476_c0_seq1_	PREDICTED: uncharacterized protein C2orf67 homolog [Danio rerio]	76.4761	-1.39285	0.737757	-1.88796	0.0590315	1	124.207	72.4029	37.3434	143.737	53.5458	27.6204
C50052_c0_seq1_	PREDICTED: 5'-AMP-activated protein kinase subunit gamma-2-like [Oreochromis niloticus]	337.422	-1.19378	0.63248	-1.88746	0.0590979	1	435.257	401.687	200.721	431.21	404.666	150.992
C656_c76_seq1_	PREDICTED: protein KIAA0284 homolog [Oreochromis niloticus]	812.147	0.985679	0.522225	1.88746	0.0590984	1	531.863	701.217	1012.94	686.139	774.22	1166.5
C18640_c0_seq1_	RecName: Full=Mediator of RNA polymerase II transcription subunit 23; AltName: Full=Cofactor required for Sp1 transcriptional activation subunit 3; Short=CRSP complex subunit 3; AltName: Full=Mediator complex subunit 23 emb	219.929	-1.03041	0.546099	-1.88685	0.0591803	1	316.357	225.143	165.711	252.217	222.961	137.182
C25_c15_seq1_	6-phosphofructokinase type C [Dicentrarchus labrax]	87.0046	-1.22388	0.6487	-1.88666	0.059206	1	119.961	97.1984	64.1839	123.848	77.2465	39.5893
C13434_c2_seq1_	nucleoporin NUP53 [Danio rerio] sp	291.473	1.36461	0.72332	1.8866	0.0592147	1	75.3737	150.757	457.456	275.721	460.845	328.683
C28762_c2_seq1_	PREDICTED: filamin-A-interacting protein 1-like [Oreochromis niloticus]	188.681	-0.965801	0.511942	-1.88655	0.0592215	1	261.154	175.552	198.387	173.569	201.894	121.53
C82045_c0_seq1_	PREDICTED: protein Wnt-11-like [Oreochromis niloticus]	4.48613	1.27173	0.674178	1.88633	0.05925	1	1.0616	0.991821	4.66792	0.904003	0.877801	18.4136
C868015_c0_seq1_	UDP-3-O-[3-hydroxymyristoyl] N-acetylglucosamine deacetylase [Escherichia coli E101]	12.6389	-1.45614	0.772003	-1.88619	0.0592694	1	25.4784	8.92639	16.3377	11.752	9.65581	3.68273
C66729_c0_seq1_	unnamed protein product [Tetraodon nigroviridis]	63.2255	-1.36397	0.723205	-1.886	0.0592943	1	85.9898	46.6156	57.1821	117.52	51.7902	20.255
C43637_c1_seq1_	PREDICTED: type I inositol-1,4,5-trisphosphate 5-phosphatase [Sus scrofa]	31.0453	-1.46205	0.775222	-1.88598	0.0592973	1	69.0041	12.8937	9.33585	52.4322	32.4786	10.1275
C33725_c0_seq1_	monoacylglycerol lipase ABHD12 [Danio rerio] sp	521.958	1.04247	0.552757	1.88595	0.0593018	1	336.528	566.33	572.987	354.369	515.269	786.262
C25493_c4_seq1_	PREDICTED: DENN domain-containing protein 4C-like [Oreochromis niloticus]	142.416	-1.159	0.614565	-1.88588	0.0593107	1	162.425	184.479	155.208	160.913	132.548	58.9236
C141_c1_seq1_	Ferritin, heavy subunit [Oncorhynchus mykiss] gb	665.94	-1.43807	0.762659	-1.8856	0.0593492	1	843.974	552.444	217.058	1594.66	653.084	134.42
C113897_c0_seq1_	solute carrier family 25, member 44 a [Danio rerio] gb	19.9738	-1.46323	0.77607	-1.88543	0.0593713	1	27.6016	10.91	19.8387	28.9281	30.723	1.84136
C29433_c1_seq1_	transmembrane protein 201 [Danio rerio] sp	69.4481	1.43663	0.762045	1.88523	0.0593989	1	20.1704	45.6238	123.7	21.6961	90.4135	115.085
C42382_c0_seq1_	PREDICTED: ribosome-binding protein 1-like [Oreochromis niloticus]	5.11817	-1.30012	0.689662	-1.88516	0.0594086	1	19.1088	0.991821	7.00188	1.80801	0.877801	0.920682
C340757_c0_seq1_	PREDICTED: Usher syndrome type-1G protein homolog [Oreochromis niloticus]	40.5438	1.41108	0.74853	1.88514	0.0594111	1	19.1088	30.7464	53.6811	16.2721	35.9898	87.4647
C7475_c1_seq1_	disabled homolog 2 [Salmo salar] gb	4209.94	-1.24951	0.662892	-1.88495	0.0594373	1	6254.96	4618.91	1895.18	6112.87	4388.13	1989.59
C2842_c17_seq1_	Slc30a2 protein [Danio rerio]	37.9647	-1.45907	0.774109	-1.88483	0.0594526	1	84.9282	5.95093	35.0094	78.6483	14.0448	9.20682
C71158_c0_seq1_	F-box only protein 18 [Danio rerio] emb	545.112	1.3134	0.696861	1.88474	0.0594652	1	214.444	617.904	896.241	232.329	535.458	774.293
C19081_c0_seq1_	Mid1-interacting protein 1 [Salmo salar]	62.7291	-1.36968	0.726788	-1.88457	0.0594879	1	64.7577	58.5174	68.8519	95.8244	74.6131	13.8102
C159464_c0_seq1_	PREDICTED: hypothetical protein LOC100711299 [Oreochromis niloticus]	11.2133	-1.46188	0.775764	-1.88444	0.0595049	1	21.232	5.95093	15.1707	9.04003	14.0448	1.84136
C18142_c0_seq1_	Serine/threonine-protein kinase 17A [Salmo salar]	659.773	1.17826	0.625395	1.88403	0.0595608	1	349.267	683.365	421.28	532.458	995.426	976.843
C28817_c0_seq1_	uncharacterized protein LOC447854 [Danio rerio] gb	210.552	-1.26825	0.673404	-1.88335	0.0596536	1	337.589	180.511	127.201	348.945	165.027	104.037
C46772_c0_seq1_	CU070 protein [Salmo salar] gb	271.269	-1.37832	0.731851	-1.88333	0.0596557	1	400.224	191.421	113.197	525.226	305.475	92.0682
C41469_c0_seq1_	CDC-like kinase 4 [Salmo salar] gb	11.6016	-1.13218	0.601201	-1.88319	0.0596747	1	46.7105	20.8282	1.16698	0.904003	0	0
C52120_c0_seq1_	TRAF2 and NCK interacting kinase b [Danio rerio]	3.87722	0.88387	0.469458	1.88274	0.0597349	1	0	0	1.16698	0	0	22.0964
C30735_c1_seq1_	PREDICTED: 5'-AMP-activated protein kinase subunit beta-2-like [Oreochromis niloticus]	19.0113	-1.4613	0.776195	-1.88265	0.0597478	1	35.0329	26.7792	7.00188	10.848	30.723	3.68273
C125988_c0_seq1_	PREDICTED: hypothetical protein LOC100709348 [Oreochromis niloticus]	52.9216	-1.35263	0.718532	-1.8825	0.0597685	1	69.0041	31.7383	61.85	79.5523	58.8126	16.5723
C68655_c1_seq1_	PREDICTED: zinc finger protein 658B-like [Oreochromis niloticus]	63.9353	-1.31496	0.698687	-1.88204	0.0598306	1	76.4353	73.3947	46.6792	93.1124	73.7353	20.255
C338_c122_seq1_	Transmembrane protein 34 [Salmo salar] gb	209.109	1.11443	0.592146	1.88202	0.059833	1	116.776	224.152	263.738	139.217	211.55	299.221
C19222_c0_seq1_	uncharacterized protein LOC100148025 [Danio rerio] emb	241.629	-1.03177	0.548232	-1.882	0.0598366	1	336.528	242.004	180.882	264.873	280.018	145.468
C2570_c3_seq1_	Zgc:112982 protein [Danio rerio]	39.8677	-1.40535	0.746784	-1.88187	0.0598533	1	70.0657	38.681	19.8387	67.8003	28.0896	14.7309
C73915_c0_seq1_	PREDICTED: coronin-2A [Oreochromis niloticus]	5.62485	-1.2955	0.688457	-1.88175	0.0598706	1	18.0472	1.98364	1.16698	9.04003	3.5112	0
C4839_c3_seq1_	PREDICTED: dedicator of cytokinesis protein 7 [Danio rerio]	127.978	1.20988	0.643017	1.88157	0.0598939	1	75.3737	117.035	147.04	72.3203	136.059	220.043
C38616_c0_seq1_	inhibitor of growth protein 4 [Danio rerio] gb	26.1399	-1.44432	0.767884	-1.88091	0.0599836	1	57.3265	33.7219	10.5028	13.5601	31.6008	10.1275
C2260_c1_seq1_	CD63 antigen [Oncorhynchus mykiss] gb	868.66	0.972135	0.516884	1.88076	0.0600042	1	593.435	697.25	1003.6	749.419	884.823	1283.43
C357_c11_seq1_	neuron navigator 3 [Danio rerio] sp	632.666	-1.29699	0.689647	-1.88065	0.0600191	1	1158.21	499.878	523.974	985.364	287.919	340.652
C63661_c1_seq1_	PREDICTED: si:ch211-107m4.1 [Danio rerio]	170.776	-1.10213	0.586117	-1.88039	0.0600544	1	230.368	157.7	129.535	206.113	209.794	91.1475
C23183_c0_seq1_	PREDICTED: syntaxin-binding protein 5-like [Oreochromis niloticus]	127.232	-1.16388	0.619044	-1.88013	0.0600907	1	194.273	120.01	95.6924	177.185	105.336	70.8925
C3171_c0_seq1_	NADH dehydrogenase 1 beta subcomplex subunit 1 [Salmo salar] gb	268.567	-1.21043	0.643906	-1.87982	0.0601322	1	381.115	241.012	164.544	414.938	280.896	128.895
C184060_c0_seq1_	PREDICTED: vasoactive intestinal polypeptide receptor 2-like [Oreochromis niloticus]	22.1311	-1.43272	0.762575	-1.8788	0.0602723	1	30.7865	22.8119	14.0038	30.7361	29.8452	4.60341
C8654_c2_seq1_	Noelin precursor [Salmo salar]	18.1318	1.43251	0.762567	1.87853	0.0603084	1	1.0616	2.97546	35.0094	18.0801	16.6782	34.9859
C29020_c0_seq1_	Annexin A13 [Salmo salar]	2464.89	-0.918038	0.488762	-1.87829	0.060341	1	3201.79	2427.98	2158.91	3037.45	2399.91	1563.32
C36093_c1_seq1_	Ptpra protein [Danio rerio]	139.562	1.25303	0.667132	1.87824	0.0603481	1	66.8809	158.691	77.0207	119.328	202.772	212.677
C54119_c0_seq1_	PREDICTED: probable histone-lysine N-methyltransferase ASH1L [Danio rerio]	112.698	-1.10933	0.590656	-1.87813	0.0603632	1	152.871	139.847	88.6905	110.288	124.648	59.8443
C412297_c0_seq1_	PREDICTED: sodium- and chloride-dependent neutral and basic amino acid transporter B(0+) [Danio rerio]	23.3488	1.38601	0.738048	1.87794	0.0603891	1	5.30801	9.91821	47.8462	0.904003	6.14461	69.9718
C19305_c0_seq1_	GSK-3-binding protein [Oncorhynchus mykiss]	1958.03	-1.23393	0.657072	-1.87792	0.0603919	1	3143.4	1811.06	921.915	2865.69	1976.81	1029.32
C92392_c0_seq1_	PREDICTED: GRAM domain-containing protein 1B-like [Oreochromis niloticus]	15.0105	1.45357	0.774147	1.87764	0.0604305	1	2.1232	24.7955	18.6717	4.52002	11.4114	28.5411
C62086_c0_seq1_	PREDICTED: dual serine/threonine and tyrosine protein kinase-like isoform 1 [Oreochromis niloticus]	204.926	-1.35862	0.723704	-1.87732	0.0604748	1	378.992	180.511	74.6868	338.097	161.515	95.7509
C6162_c0_seq1_	PREDICTED: stAR-related lipid transfer protein 13 [Danio rerio]	252.623	-1.0542	0.561561	-1.87726	0.0604823	1	350.329	320.358	233.396	272.105	192.238	147.309
C183565_c0_seq1_	unnamed protein product [Tetraodon nigroviridis]	126.247	1.28361	0.683867	1.87699	0.0605193	1	54.1417	123.978	214.724	79.5523	100.947	184.136
C19075_c2_seq1_	PREDICTED: hypothetical protein LOC795005 [Danio rerio]	3181.65	0.959116	0.511106	1.87655	0.0605796	1	2132.76	3778.84	3043.49	2425.44	3155.69	4553.69
C22356_c3_seq1_	PREDICTED: upstream stimulatory factor 2-like [Oreochromis niloticus]	315.028	0.995042	0.530327	1.87628	0.060617	1	209.136	318.374	296.413	244.081	358.143	464.023
C13584_c0_seq1_	unnamed protein product [Tetraodon nigroviridis]	377.836	-0.999838	0.533037	-1.87574	0.060691	1	582.819	376.892	280.075	374.257	391.499	261.474
C22186_c0_seq1_	hypothetical protein, conserved in P. knowlesi [Plasmodium knowlesi strain H] emb	17.661	-1.45505	0.775808	-1.87553	0.0607199	1	36.0945	19.8364	26.8406	5.42402	13.167	4.60341
C53471_c0_seq1_	novel protein (zgc:77289) [Danio rerio]	154.292	-1.24843	0.665648	-1.8755	0.0607234	1	221.875	165.634	78.1877	193.457	196.627	69.9718
C47684_c0_seq1_	COMM domain-containing protein 5 [Oncorhynchus mykiss] gb	158.903	1.41198	0.752982	1.87519	0.0607667	1	71.1273	41.6565	246.233	165.433	95.6803	333.287
C48161_c0_seq1_	[Pyruvate dehydrogenase [lipoamide]] kinase isozyme 4, mitochondrial [Danio rerio] gb	14.4673	1.45339	0.775184	1.8749	0.060806	1	2.1232	16.861	9.33585	6.32802	25.4562	26.6998
C92060_c0_seq1_	PREDICTED: pleckstrin homology domain-containing family A member 1-like [Oreochromis niloticus]	239.596	1.0453	0.557561	1.87477	0.0608244	1	129.515	219.192	252.068	214.249	316.886	305.666
C20437_c2_seq1_	PREDICTED: uncharacterized protein C12orf34 homolog [Oreochromis niloticus]	52.3247	-1.39134	0.742188	-1.87464	0.0608416	1	108.283	25.7873	35.0094	82.2643	37.7454	24.8584
C84609_c0_seq1_	Hermansky-Pudlak syndrome 5 [Danio rerio]	142.149	-1.01141	0.539567	-1.87448	0.0608638	1	210.197	132.904	120.199	148.257	148.348	92.9888
C24048_c2_seq1_	PREDICTED: cingulin-like [Oreochromis niloticus]	29.6469	1.3889	0.741001	1.87435	0.0608819	1	1.0616	0.991821	24.5066	55.1442	28.9674	67.2098
C12148_c2_seq1_	COP9 signalosome complex subunit 8 [Salmo salar] gb	54.9855	-1.33049	0.709891	-1.87422	0.0609001	1	90.2362	30.7464	64.1839	79.5523	41.2566	23.9377
C6709_c9_seq1_	PREDICTED: ras-related protein Rab-37-like [Oreochromis niloticus]	11.3722	-1.25744	0.671004	-1.87397	0.0609344	1	37.1561	0.991821	1.16698	27.1201	0.877801	0.920682
C47335_c0_seq1_	PREDICTED: UBX domain-containing protein 2A-like [Oreochromis niloticus]	48.6601	-1.40202	0.748349	-1.87348	0.0610015	1	83.8665	46.6156	16.3377	73.2243	54.4236	17.4929
C1048_c2_seq1_	PREDICTED: hypothetical protein LOC553309 [Danio rerio]	350.325	-1.321	0.705333	-1.87288	0.0610852	1	611.483	203.323	191.385	616.53	310.741	168.485
C87262_c0_seq1_	fatty aldehyde dehydrogenase [Salmo salar] gb	34.7676	-1.45278	0.775848	-1.8725	0.0611374	1	92.3594	5.95093	11.6698	50.6242	35.112	12.8895
C66969_c1_seq1_	PREDICTED: DENN domain-containing protein 3-like [Oreochromis niloticus]	8.62191	-1.40866	0.752572	-1.87179	0.0612355	1	18.0472	4.9591	8.16886	12.656	7.90021	0
C62237_c0_seq1_	PREDICTED: CD109 antigen-like [Oreochromis niloticus]	1317.54	0.906529	0.484442	1.87128	0.0613058	1	897.054	1180.27	1391.04	1124.58	1495.77	1816.5
C76225_c0_seq1_	Novel protein containing Rieske [2Fe-2S] domain and Protein of unknown function (DUF455) domains [Xenopus (Silurana) tropicalis] emb	14.6117	-1.44125	0.770285	-1.87106	0.0613373	1	37.1561	17.8528	14.0038	1.80801	13.167	3.68273
C44567_c1_seq1_	Malonyl CoA-acyl carrier protein transacylase, mitochondrial precursor [Salmo salar]	100.153	-1.15577	0.617801	-1.87078	0.0613758	1	164.548	86.2884	75.8537	126.56	86.9023	60.765
C61116_c0_seq1_	PREDICTED: gem-associated protein 5 [Danio rerio]	30.1883	-1.45189	0.776157	-1.87061	0.0613989	1	39.2793	41.6565	11.6698	51.5282	34.2342	2.76204
C40249_c1_seq1_	PREDICTED: WD repeat-containing protein 46 [Oreochromis niloticus]	2416.35	1.03669	0.554268	1.87038	0.0614311	1	1462.89	2239.53	3017.81	1657.94	2710.65	3409.28
C73324_c0_seq1_	protein transport protein Sec24b [Oryzias latipes]	235.279	-1.02041	0.545598	-1.87026	0.0614482	1	382.177	213.241	191.385	241.369	215.939	167.564
C32445_c1_seq1_	unnamed protein product [Tetraodon nigroviridis]	118.085	-1.12431	0.601383	-1.86954	0.0615484	1	163.487	116.043	99.1934	162.721	104.458	62.6063
C27271_c0_seq1_	PREDICTED: microtubule-associated serine/threonine-protein kinase 2 [Gallus gallus]	25.1126	1.44837	0.774727	1.86953	0.0615495	1	5.30801	42.6483	7.00188	22.6001	29.8452	43.272
C22600_c1_seq1_	Histone-lysine N-methyltransferase trithorax [Acromyrmex echinatior]	375.026	-1.23763	0.662012	-1.86949	0.0615541	1	753.737	219.192	264.905	457.426	307.23	247.663
C74508_c0_seq1_	C-1-tetrahydrofolate synthase, cytoplasmic [Salmo salar] gb	562.221	0.898329	0.480616	1.86912	0.0616062	1	400.224	490.951	602.162	546.922	529.314	803.755
C70378_c0_seq1_	PREDICTED: bone morphogenetic protein receptor type-2-like [Oreochromis niloticus]	14.2325	-1.45028	0.775931	-1.86908	0.0616121	1	39.2793	17.8528	9.33585	8.13603	5.2668	5.52409
C3142_c0_seq1_	Cytochrome c oxidase polypeptide VIa, mitochondrial precursor [Oncorhynchus mykiss]	122.985	-1.26955	0.679267	-1.86901	0.061622	1	199.581	119.019	107.362	186.225	64.9573	60.765
C208_c0_seq1_	60S ribosomal protein L19 [Salmo salar] gb	34.191	-1.44735	0.774465	-1.86884	0.0616446	1	43.5257	23.8037	30.3415	72.3203	34.2342	0.920682
C39315_c0_seq1_	dual specificity testis-specific protein kinase 2 [Danio rerio] gb	351.723	1.23938	0.66352	1.86788	0.0617784	1	160.302	409.622	459.79	164.529	414.322	501.771
C17478_c0_seq1_	PREDICTED: long-chain-fatty-acid--CoA ligase 4-like [Oreochromis niloticus]	3.837	1.1077	0.593131	1.86754	0.0618259	1	0	0	4.66792	0.904003	0.877801	16.5723
C132172_c0_seq1_	PREDICTED: probable methyltransferase TARBP1-like [Oreochromis niloticus]	87.0503	1.44625	0.774441	1.86748	0.0618349	1	7.43121	201.34	58.349	55.1442	107.969	92.0682
C20965_c2_seq1_	Methyltransferase-like protein 10 [Salmo salar] gb	69.9912	-1.41952	0.760155	-1.86741	0.0618444	1	63.6961	73.3947	115.531	65.9923	93.0469	8.28613
C65179_c1_seq1_	Pc24g01320 [Penicillium chrysogenum Wisconsin 54-1255] emb	114.051	-1.03231	0.552951	-1.86691	0.0619143	1	162.425	108.108	100.36	131.08	112.358	69.9718
C63984_c0_seq1_	Arid1b [Danio rerio]	86.8179	-1.23757	0.662959	-1.86674	0.0619385	1	163.487	89.2639	61.85	96.7284	56.1792	53.3995
C130913_c0_seq1_	PREDICTED: RNA-binding protein MEX3D-like [Oreochromis niloticus]	422.654	1.19592	0.640759	1.86642	0.0619827	1	234.614	519.714	428.282	206.113	470.501	676.701
C19011_c1_seq1_	PREDICTED: homeodomain-interacting protein kinase 3 [Oreochromis niloticus]	8.67034	-1.40399	0.752327	-1.8662	0.0620136	1	18.0472	13.8855	5.8349	7.23203	7.02241	0
C226154_c0_seq1_	unnamed protein product [Tetraodon nigroviridis]	34.9588	-1.39966	0.7502	-1.86572	0.062081	1	52.0185	39.6728	21.0057	61.4722	25.4562	10.1275
C50443_c0_seq1_	PREDICTED: protein C10-like [Oreochromis niloticus]	217.223	1.0251	0.549442	1.86571	0.0620825	1	116.776	214.233	259.07	188.937	254.562	269.76
C1944_c0_seq1_	Actin-related protein 2/3 complex subunit 1B [Salmo salar] gb	196.667	-1.28991	0.691573	-1.86518	0.0621555	1	307.865	187.454	91.0245	320.017	184.338	89.3061
C56086_c1_seq1_	Tetratricopeptide repeat protein 15 [Salmo salar]	92.6576	-1.13966	0.611053	-1.86507	0.0621718	1	121.023	112.076	91.0245	112.096	74.6131	45.1134
C13312_c1_seq1_	caspase 6 precursor [Oncorhynchus mykiss] gb	268.447	1.11489	0.597825	1.86492	0.0621931	1	140.131	172.577	292.912	326.345	316.886	361.828
C59223_c0_seq1_	PREDICTED: armadillo repeat-containing protein 6-like [Oreochromis niloticus]	273.053	1.04838	0.562168	1.86489	0.0621965	1	151.809	241.012	365.265	292.897	227.35	359.986
C2896_c7_seq1_	SJCHGC03025 protein [Schistosoma japonicum]	41.0129	-1.43948	0.771891	-1.86487	0.0621992	1	61.5729	60.5011	22.1726	17.1761	76.3687	8.28613
C65031_c0_seq1_	hypothetical protein CRE 23222 [Caenorhabditis remanei] gb	22.2934	-1.44385	0.774284	-1.86476	0.0622151	1	65.8193	31.7383	8.16886	13.5601	5.2668	9.20682
C33082_c0_seq1_	Phosphatidylinositol transfer protein beta isoform [Esox lucius]	65.5581	-1.10877	0.594612	-1.8647	0.0622241	1	98.729	59.5093	61.85	70.5123	64.0795	38.6686
C413417_c0_seq1_	PREDICTED: hypothetical protein LOC100691774 [Oreochromis niloticus]	12.1746	-1.429	0.766371	-1.86463	0.0622334	1	23.3552	23.8037	11.6698	4.52002	8.77801	0.920682
C103830_c0_seq1_	PREDICTED: synembryn-B-like [Oreochromis niloticus]	7.52053	-1.40437	0.753163	-1.86462	0.062234	1	19.1088	2.97546	3.50094	6.32802	12.2892	0.920682
C48710_c0_seq1_	PREDICTED: mitogen-activated protein kinase kinase kinase 5-like [Oreochromis niloticus]	183.033	0.937501	0.502805	1.86454	0.0622457	1	121.023	176.544	193.719	180.801	172.927	253.187
C34509_c0_seq1_	ADP-ribosylation factor-like protein 11 [Danio rerio] gb	69.6775	-1.21337	0.650769	-1.86452	0.0622483	1	107.222	67.4438	53.6811	97.6324	56.1792	35.9066
C48053_c0_seq1_	Probable protein COQ10, mitochondrial precursor [Salmo salar]	1797.3	1.02303	0.548742	1.86433	0.0622756	1	1150.78	1702.96	2367.8	1346.97	1574.77	2640.51
C62635_c2_seq1_	MBD2 (methyl-CpG-binding protein)-interacting zinc finger protein [Danio rerio] gb	138.03	1.28563	0.689612	1.86429	0.0622816	1	40.3409	207.291	134.203	113.904	186.972	145.468
C131447_c0_seq1_	PREDICTED: DNA ligase 4 [Oreochromis niloticus]	593.764	0.99473	0.533577	1.86427	0.0622843	1	337.589	478.058	692.02	577.658	725.063	752.197
C65700_c1_seq1_	PREDICTED: extended synaptotagmin-1-like [Oreochromis niloticus]	151.282	1.28043	0.686901	1.86407	0.0623114	1	94.4826	100.174	152.874	79.5523	169.416	311.19
C32673_c0_seq1_	PREDICTED: histone H2B 7-like [Oreochromis niloticus]	23.8384	-1.44259	0.773911	-1.86402	0.0623191	1	33.9713	18.8446	11.6698	38.8721	35.9898	3.68273
C77442_c0_seq1_	phosphatidylinositol-4-phosphate 5-kinase, type I, beta a [Danio rerio] gb	74.228	-1.41225	0.75771	-1.86384	0.062344	1	117.838	61.4929	21.0057	120.232	102.703	22.0964
C103435_c0_seq1_	PREDICTED: WD repeat, SAM and U-box domain-containing protein 1-like [Oreochromis niloticus]	45.518	-1.30203	0.698617	-1.86373	0.0623602	1	63.6961	37.6892	63.017	57.8562	33.3564	17.4929
C57_c1_seq1_	PREDICTED: isobutyryl-CoA dehydrogenase, mitochondrial [Oreochromis niloticus]	177.913	-1.08895	0.584452	-1.8632	0.0624348	1	261.154	229.111	130.702	154.585	186.972	104.958
C230954_c0_seq1_	PREDICTED: serine/threonine-protein kinase NIM1-like [Danio rerio]	29.083	1.3682	0.734337	1.86318	0.062437	1	8.49282	31.7383	39.6773	19.8881	35.112	39.5893
C56488_c0_seq1_	unnamed protein product [Tetraodon nigroviridis]	172.681	-1.42468	0.764684	-1.8631	0.0624485	1	256.908	62.4847	88.6905	397.762	186.972	43.272
C25433_c1_seq1_	pol-like protein [Biomphalaria glabrata]	44.7261	-1.39655	0.749741	-1.86271	0.062503	1	89.1746	20.8282	31.5085	75.0323	32.4786	19.3343
C199288_c0_seq1_	PREDICTED: ubiquilin-1 isoform 4 [Canis lupus familiaris]	42.7169	-1.44488	0.775912	-1.86217	0.0625786	1	50.9569	67.4438	32.6755	23.5041	79.8799	1.84136
C59379_c0_seq1_	PREDICTED: transcription initiation factor TFIID subunit 4 [Danio rerio]	1519.66	1.13329	0.608646	1.86199	0.0626042	1	854.59	1613.69	1955.86	834.395	1603.74	2255.67
C23649_c0_seq1_	PREDICTED: signal peptide peptidase-like 3-like [Oreochromis niloticus]	517.275	-0.960685	0.516106	-1.86141	0.0626864	1	704.904	551.452	409.61	617.434	491.568	328.683
C64677_c0_seq1_	PREDICTED: zinc finger protein ZXDC-like [Oreochromis niloticus]	543.817	-1.0643	0.571804	-1.86131	0.0627011	1	795.14	590.133	344.259	646.362	557.403	329.604
C52189_c0_seq1_	Vesicle-trafficking protein SEC22b-B precursor [Salmo salar] gb	14.9898	-1.44001	0.773696	-1.86121	0.0627151	1	27.6016	18.8446	9.33585	21.6961	8.77801	3.68273
C71397_c0_seq1_	PREDICTED: chaperone activity of bc1 complex-like, mitochondrial-like [Oreochromis niloticus]	149.949	-1.30658	0.702028	-1.86115	0.0627231	1	173.041	226.135	86.3566	162.721	205.405	46.0341
C144768_c0_seq1_	PREDICTED: glycerophosphodiester phosphodiesterase domain-containing protein 5-like [Oreochromis niloticus]	137.992	0.986153	0.529983	1.86073	0.062783	1	90.2362	137.863	147.04	130.176	123.77	198.867
C9517_c2_seq1_	Heterogeneous nuclear ribonucleoprotein U-like protein 1 [Salmo salar] gb	199.712	-1.03429	0.555905	-1.86055	0.0628076	1	326.973	186.462	208.89	173.569	161.515	140.864
C35147_c0_seq1_	PREDICTED: nuclear factor of activated T-cells 5 [Oreochromis niloticus]	20.2174	1.41627	0.761495	1.85985	0.0629069	1	6.36961	19.8364	31.5085	16.2721	11.4114	35.9066
C21445_c0_seq1_	Motile sperm domain-containing protein 2 [Salmo salar] gb	44.8773	1.41185	0.759228	1.85958	0.0629443	1	7.43121	16.861	129.535	9.94404	7.90021	97.5922
C51501_c1_seq1_	PREDICTED: serine/threonine-protein phosphatase 6 regulatory ankyrin repeat subunit B [Oreochromis niloticus]	112.057	-1.28924	0.693454	-1.85915	0.0630056	1	149.686	154.724	56.0151	123.848	145.715	42.3513
C49156_c2_seq1_	PREDICTED: histone-lysine N-methyltransferase MLL3 [Danio rerio]	2.6453	-0.953745	0.513033	-1.85903	0.0630224	1	13.8008	0	1.16698	0.904003	0	0
C58555_c0_seq1_	PREDICTED: nucleolar complex protein 4 homolog [Oreochromis niloticus]	59.9505	-1.40938	0.758179	-1.8589	0.063041	1	97.6674	47.6074	19.8387	112.096	64.0795	18.4136
C17368_c1_seq1_	PREDICTED: citrate synthase, mitochondrial-like [Danio rerio] gb	46.2031	1.36872	0.736419	1.85862	0.0630809	1	19.1088	37.6892	60.683	18.9841	58.8126	81.9407
C55692_c0_seq1_	PREDICTED: glycosylphosphatidylinositol anchor attachment 1 protein-like [Oreochromis niloticus]	144.497	-1.14656	0.616913	-1.85854	0.0630926	1	192.15	162.659	109.696	204.305	127.281	70.8925
C16638_c2_seq1_	PREDICTED: histone-lysine N-methyltransferase EZH1-like [Oreochromis niloticus]	47.8325	1.24898	0.672122	1.85826	0.0631316	1	22.2936	32.7301	54.8481	59.6642	45.6456	71.8132
C153458_c1_seq1_	PREDICTED: uncharacterized protein C2orf67 homolog [Danio rerio]	53.9687	-1.41147	0.7596	-1.85817	0.0631447	1	124.207	44.6319	16.3377	77.7443	35.112	25.7791
C35591_c0_seq1_	Selenide, water dikinase 1 [Salmo salar] gb	55.49	-1.41913	0.763821	-1.85794	0.0631776	1	67.9425	90.2557	24.5066	48.8162	91.2913	10.1275
C46172_c0_seq1_	PREDICTED: LOW QUALITY PROTEIN: alpha-1,2-mannosyltransferase ALG9-like [Oreochromis niloticus]	11.713	-1.44145	0.775927	-1.85771	0.0632102	1	28.6633	10.91	8.16886	14.4641	4.389	3.68273
C30044_c0_seq1_	myotubularin-related protein 6 [Salmo salar] gb	146.601	-1.14633	0.61745	-1.85655	0.0633749	1	180.472	137.863	155.208	214.249	125.526	66.2891
C9305_c6_seq1_	CTAGE family, member 5 [Danio rerio] gb	67.9699	-1.44044	0.776014	-1.8562	0.0634247	1	101.914	117.035	8.16886	73.2243	99.1915	8.28613
C17698_c0_seq1_	hypothetical protein [Amblyomma maculatum]	7.69455	-1.38872	0.748436	-1.8555	0.0635255	1	20.1704	6.94275	1.16698	9.94404	7.02241	0.920682
C33776_c1_seq1_	PREDICTED: alpha-catulin [Oreochromis niloticus]	35.1562	1.3702	0.738813	1.8546	0.0636538	1	10.616	51.5747	43.1783	18.9841	36.8676	49.7168
C59034_c0_seq1_	PREDICTED: protein transport protein Sec24B-like [Oreochromis niloticus]	310.653	-0.957912	0.5168	-1.85355	0.0638042	1	425.702	273.743	288.244	383.297	294.063	198.867
C103752_c0_seq1_	Dihydropyrimidinase-related protein 5 [Salmo salar] gb	41.785	1.43735	0.775484	1.85348	0.0638134	1	3.18481	54.5501	37.3434	24.4081	84.2689	46.9548
C44523_c0_seq1_	PREDICTED: RRP12-like protein-like [Oreochromis niloticus]	2013.77	1.13301	0.611359	1.85327	0.0638441	1	978.797	2035.22	2981.64	1278.26	2205.04	2603.69
C68650_c0_seq1_	hypothetical protein CRE 23222 [Caenorhabditis remanei] gb	23.4404	-1.41516	0.76362	-1.85322	0.0638502	1	40.3409	4.9591	15.1707	38.8721	40.3788	0.920682
C12893_c0_seq1_	26S proteasome non-ATPase regulatory subunit 2 [Salmo salar] gb	206.091	-1.15982	0.625846	-1.85321	0.0638527	1	289.817	264.816	119.032	232.329	225.595	104.958
C84984_c1_seq1_	PREDICTED: zinc finger CCHC domain-containing protein 2 [Danio rerio]	104.747	-1.25663	0.678144	-1.85304	0.0638771	1	117.838	154.724	79.3547	127.464	114.114	34.9859
C3486_c5_seq1_	PREDICTED: hypothetical protein LOC563478 [Danio rerio]	464.493	1.16602	0.629251	1.85302	0.0638792	1	216.567	589.142	619.667	272.105	483.668	605.808
C8891_c0_seq1_	PREDICTED: acyl-CoA-binding domain-containing protein 5-like [Oreochromis niloticus]	24.5864	1.38658	0.748648	1.85212	0.0640093	1	11.6776	26.7792	12.8368	25.3121	18.4338	52.4788
C5877_c2_seq1_	PREDICTED: polymerase delta-interacting protein 2-like [Oreochromis niloticus]	306.796	1.02682	0.55448	1.85186	0.0640453	1	158.179	406.647	322.087	277.529	308.986	367.352
C59564_c1_seq1_	PREDICTED: probable ATP-dependent RNA helicase DHX40 [Oreochromis niloticus]	742.587	0.918533	0.496045	1.85171	0.0640672	1	433.134	666.504	805.217	831.683	827.766	891.22
C656675_c0_seq1_	hypothetical protein c4088 [Escherichia coli CFT073] gb	89.0991	-1.18608	0.640619	-1.85145	0.0641043	1	119.961	75.3784	130.702	72.3203	94.8025	41.4307
C83994_c0_seq1_	large neutral amino acids transporter small subunit 1 [Danio rerio] emb	159.923	1.26312	0.682273	1.85134	0.0641202	1	71.1273	217.209	211.223	75.9363	148.348	235.694
C1134_c2_seq1_	malate dehydrogenase 1 [Salmo salar]	2059.21	-1.23552	0.667416	-1.8512	0.0641406	1	2486.27	2792.97	1074.79	2306.11	2912.54	782.579
C114095_c0_seq1_	Tetratricopeptide repeat protein 14 [Salmo salar]	25.3856	1.3578	0.733496	1.85113	0.0641503	1	9.55442	26.7792	18.6717	19.8881	35.9898	41.4307
C31482_c0_seq1_	PREDICTED: aminomethyltransferase, mitochondrial-like [Oreochromis niloticus]	275.812	-1.00467	0.542737	-1.85113	0.0641515	1	353.513	217.209	316.252	287.473	323.908	156.516
C14219_c1_seq1_	nuclear respiratory factor 1 [Danio rerio]	534.435	-1.069	0.577552	-1.85091	0.0641822	1	940.579	501.861	366.432	536.074	473.135	388.528
C5878_c0_seq1_	peripheral-type benzodiazepine receptor [Oncorhynchus mykiss] gb	501.435	-1.09432	0.59124	-1.85088	0.0641862	1	657.132	521.698	336.09	690.659	542.481	260.553
C113141_c0_seq1_	PREDICTED: T-lymphoma invasion and metastasis-inducing protein 2-like [Oreochromis niloticus]	49.2877	-1.28717	0.695467	-1.8508	0.0641989	1	82.8049	40.6647	28.0075	62.3762	57.9348	23.9377
C73306_c0_seq1_	unnamed protein product [Tetraodon nigroviridis]	28.8132	1.32918	0.718376	1.85026	0.064276	1	8.49282	31.7383	32.6755	29.8321	34.2342	35.9066
C13705_c0_seq1_	PREDICTED: mitogen-activated protein kinase kinase kinase 14-like [Oreochromis niloticus]	20.7619	-1.37512	0.743384	-1.84982	0.0643401	1	48.8337	5.95093	1.16698	32.5441	34.2342	1.84136
C15461_c0_seq1_	Brain protein I3 [Salmo salar] gb	162.039	1.38532	0.749171	1.84914	0.0644378	1	42.4641	211.258	78.1877	94.9204	331.809	213.598
C78188_c0_seq1_	tRNA (cytosine-5-)-methyltransferase [Danio rerio] dbj	300.897	-1.07921	0.583649	-1.84908	0.064446	1	444.811	294.571	217.058	410.418	258.073	180.454
C50048_c0_seq1_	PREDICTED: anoctamin-10-like [Oreochromis niloticus]	111.869	1.35998	0.735519	1.84901	0.0644558	1	52.0185	97.1984	173.88	36.1601	97.4359	214.519
C16212_c0_seq1_	calreticulin, like 2 [Danio rerio]	132.499	1.35242	0.731453	1.84895	0.0644648	1	37.1561	169.601	207.723	54.2402	162.393	163.881
C635_c0_seq1_	L-lactate dehydrogenase A chain [Salmo salar] gb	23.9857	-1.43336	0.775488	-1.84834	0.0645534	1	31.8481	37.6892	18.6717	39.7762	13.167	2.76204
C97495_c0_seq1_	unnamed protein product [Tetraodon nigroviridis]	905.886	1.12683	0.609688	1.84821	0.0645724	1	528.678	1070.17	1002.44	482.738	963.825	1387.47
C37231_c0_seq1_	PREDICTED: protein FAM13A-like [Anolis carolinensis]	32.2304	-1.37297	0.743011	-1.84785	0.0646241	1	44.5873	35.7056	17.5047	42.4882	43.89	9.20682
C83660_c0_seq1_	mitogen-activated protein kinase kinase kinase kinase 5 [Danio rerio]	19.0432	1.43369	0.775925	1.84772	0.0646428	1	2.1232	23.8037	31.5085	8.13603	21.0672	27.6204
C101494_c0_seq1_	PREDICTED: adenosine receptor A2a-like [Xenopus (Silurana) tropicalis]	68.2852	-1.43244	0.775309	-1.84757	0.0646648	1	150.747	24.7955	37.3434	150.065	22.8228	23.9377
C102480_c0_seq1_	PREDICTED: zinc finger protein 106 homolog [Danio rerio]	1515.15	0.918892	0.497558	1.8468	0.0647756	1	997.906	1735.69	1685.12	1203.23	1416.77	2052.2
C20816_c6_seq1_	PREDICTED: nucleus accumbens-associated protein 1-like [Oreochromis niloticus]	77.0321	-1.42318	0.770738	-1.84651	0.0648182	1	150.747	22.8119	79.3547	152.777	30.723	25.7791
C30684_c0_seq1_	PRELI domain-containing protein 1, mitochondrial precursor [Salmo salar]	301.127	1.3125	0.710873	1.84633	0.0648448	1	142.255	318.374	458.623	104.864	262.462	520.185
C78988_c0_seq1_	PREDICTED: tetratricopeptide repeat protein 17 [Oreochromis niloticus]	100.393	1.42088	0.769799	1.84578	0.0649239	1	1.0616	131.912	96.8594	37.9681	200.139	134.42
C2502_c0_seq1_	precerebellin-like protein precursor [Oncorhynchus mykiss] gb	15.858	-1.42614	0.772691	-1.84568	0.064938	1	30.7865	12.8937	16.3377	23.5041	7.02241	4.60341
C174415_c0_seq1_	PREDICTED: protocadherin-23-like [Oreochromis niloticus]	21.3708	1.41932	0.769026	1.84561	0.0649486	1	4.24641	26.7792	10.5028	33.4481	21.945	31.3032
C30386_c0_seq1_	PREDICTED: DNA replication licensing factor mcm7-like [Oreochromis niloticus]	150.493	-1.39505	0.755931	-1.84548	0.064968	1	166.671	235.062	56.0151	171.761	244.906	28.5411
C54416_c0_seq1_	serine dehydratase-like [Ictalurus punctatus] gb	8.34991	1.36561	0.739995	1.84543	0.0649751	1	1.0616	4.9591	9.33585	10.848	0.877801	23.017
C58935_c0_seq1_	ADP-ribosylation factor-like 4 [Salmo salar] gb	19.174	-1.39182	0.754279	-1.84523	0.0650042	1	32.9097	12.8937	16.3377	28.0241	18.4338	6.44477
C20612_c2_seq1_	PREDICTED: metalloendopeptidase OMA1, mitochondrial-like [Oreochromis niloticus]	637.52	-1.08631	0.588828	-1.84487	0.0650566	1	975.612	581.207	425.948	878.691	571.448	392.21
C6029_c0_seq1_	enoyl-CoA hydratase, mitochondrial precursor [Salmo salar] gb	407.054	-1.3484	0.731154	-1.84421	0.0651527	1	503.199	544.51	138.871	587.602	552.137	116.006
C14459_c0_seq1_	unnamed protein product [Tetraodon nigroviridis]	733.861	0.983002	0.533075	1.84402	0.0651799	1	549.91	751.8	664.012	595.738	633.772	1207.93
C2394_c30_seq1_	PREDICTED: leucine-rich repeat-containing protein 4B-like [Oreochromis niloticus]	428.831	-1.02914	0.558287	-1.84338	0.065273	1	533.986	503.845	420.113	336.289	549.503	229.25
C33909_c0_seq1_	PREDICTED: hypothetical protein LOC100704554 [Oreochromis niloticus]	7.52851	-1.15596	0.627111	-1.84331	0.0652841	1	28.6633	0.991821	4.66792	10.848	0	0
C16567_c0_seq1_	PREDICTED: collagen, type VI, alpha 1 [Taeniopygia guttata]	15.0112	1.38613	0.752103	1.843	0.065329	1	0	9.91821	33.8424	7.23203	10.5336	28.5411
C67881_c0_seq1_	guanine nucleotide binding protein (G protein), alpha inhibiting activity polypeptide a [Danio rerio] gb	86.828	1.25382	0.680377	1.84283	0.0653541	1	42.4641	54.5501	133.036	63.2802	89.5357	138.102
C233492_c0_seq1_	PREDICTED: serine/threonine-protein kinase DCLK2-like [Oreochromis niloticus]	13.1367	1.42916	0.775544	1.84279	0.0653599	1	1.0616	18.8446	16.3377	14.4641	8.77801	19.3343
C54649_c0_seq1_	protein LZIC [Salmo salar] gb	239.709	-1.40436	0.762239	-1.84242	0.0654142	1	493.645	107.117	127.201	511.666	99.1915	99.4336
C21532_c0_seq1_	PREDICTED: H/ACA ribonucleoprotein complex non-core subunit NAF1 [Equus caballus]	350.508	-1.00514	0.545791	-1.84162	0.0655311	1	527.616	291.595	313.918	440.25	295.819	233.853
C113136_c0_seq1_	Toll-like receptor 13 [Salmo salar] gb	5.50485	1.33333	0.72408	1.84141	0.065562	1	0	5.95093	7.00188	2.71201	2.6334	14.7309
C181666_c0_seq1_	PREDICTED: cAMP-dependent protein kinase inhibitor alpha-like [Anolis carolinensis]	69.3063	1.32228	0.718177	1.84115	0.0655989	1	18.0472	86.2884	59.516	62.3762	114.114	75.4959
C12748_c1_seq1_	ubiquitin-conjugating enzyme E2 H [Danio rerio] gb	260.412	1.14467	0.621715	1.84115	0.0656	1	138.008	366.974	232.229	160.913	290.552	373.797
C114525_c0_seq1_	Activin receptor type-1 precursor [Salmo salar]	268.617	-1.22291	0.664343	-1.84079	0.0656528	1	415.086	252.914	141.205	424.882	242.273	135.34
C17267_c1_seq1_	PREDICTED: pyruvate dehydrogenase protein X component, mitochondrial-like [Oreochromis niloticus]	56.5339	-1.4123	0.767282	-1.84065	0.0656732	1	59.4497	55.542	36.1764	115.712	64.9573	7.36545
C553013_c0_seq1_	PREDICTED: hypothetical protein LOC100695983 [Oreochromis niloticus]	19.1181	1.41798	0.770503	1.84033	0.0657204	1	5.30801	10.91	37.3434	3.61601	9.65581	47.8754
C13542_c0_seq1_	Ras-related protein Rab-7a [Salmo salar]	448.781	-0.937828	0.509627	-1.84023	0.0657351	1	538.232	413.589	473.794	541.498	469.623	255.949
C99488_c0_seq1_	PREDICTED: AT-rich interactive domain-containing protein 1B-like [Oreochromis niloticus]	4.55262	-1.34907	0.733171	-1.84005	0.0657607	1	14.8624	2.97546	2.33396	2.71201	3.5112	0.920682
C1608_c2_seq1_	unnamed protein product [Tetraodon nigroviridis]	63.3614	-1.35931	0.738772	-1.83996	0.0657746	1	119.961	53.5583	23.3396	100.344	54.4236	28.5411
C2144_c1_seq1_	ubiquinol-cytochrome c reductase core I protein [Oncorhynchus mykiss]	432.6	-1.15654	0.628743	-1.83945	0.0658483	1	554.156	424.499	264.905	565.002	587.249	199.788
C48242_c1_seq1_	PREDICTED: glycosyltransferase-like protein LARGE1-like isoform 1 [Oreochromis niloticus]	10.5742	-1.4243	0.774329	-1.8394	0.0658566	1	21.232	3.96728	10.5028	15.3681	10.5336	1.84136
C454210_c0_seq1_	mix-type homeobox gene 2 [Danio rerio] gb	268.764	0.929148	0.505139	1.83939	0.0658576	1	166.671	301.514	285.91	229.617	281.774	347.097
C569_c27_seq1_	Caprin-1 [Salmo salar]	1210.28	1.02291	0.556117	1.83938	0.0658594	1	664.563	1033.48	1616.27	980.844	1429.94	1536.62
C14834_c0_seq1_	PREDICTED: leucine-rich repeat and WD repeat-containing protein KIAA1239-like [Oreochromis niloticus]	70.3385	-1.31618	0.71562	-1.83922	0.0658832	1	96.6058	55.542	49.0132	130.176	65.8351	24.8584
C71646_c0_seq1_	PREDICTED: coiled-coil domain-containing protein 79-like [Xenopus (Silurana) tropicalis]	53.0125	-1.41159	0.767513	-1.83917	0.0658901	1	119.961	19.8364	42.0113	91.3043	21.945	23.017
C57558_c0_seq1_	WD repeat domain 36 [Danio rerio]	208.258	-1.18767	0.645793	-1.83909	0.065902	1	266.462	334.244	145.873	186.225	225.595	91.1475
C82510_c0_seq1_	PREDICTED: probable helicase senataxin [Danio rerio]	668.381	0.938545	0.510374	1.83894	0.0659246	1	442.688	780.563	707.19	516.186	633.772	929.888
C84818_c0_seq1_	PREDICTED: MHC class II regulatory factor RFX1-like [Oreochromis niloticus]	387.584	1.0432	0.56737	1.83865	0.0659666	1	272.832	343.17	452.788	320.017	294.063	642.636
C27008_c0_seq1_	PREDICTED: forkhead box protein K2 [Equus caballus]	63.3139	-1.2881	0.700582	-1.83862	0.0659715	1	89.1746	75.3784	35.0094	94.0164	61.4461	24.8584
C120087_c0_seq1_	PREDICTED: enhancer of mRNA-decapping protein 3-like [Oreochromis niloticus]	20.2998	1.40058	0.761802	1.83851	0.0659876	1	1.0616	36.6974	9.33585	4.52002	33.3564	36.8273
C51391_c1_seq1_	Acylglycerol kinase, mitochondrial precursor [Salmo salar]	86.9759	-1.07846	0.586602	-1.83849	0.0659903	1	125.269	92.2393	95.6924	91.3043	66.7129	50.6375
C100985_c0_seq1_	PREDICTED: hypothetical protein LOC553309 [Danio rerio]	926.128	-1.20319	0.654542	-1.83821	0.066031	1	1565.86	636.749	686.185	1489.8	646.939	531.233
C48822_c0_seq1_	PREDICTED: protein Wnt-11-like [Oreochromis niloticus]	600.705	-1.33254	0.725148	-1.83761	0.0661202	1	824.865	680.389	187.884	828.067	879.556	203.471
C241126_c0_seq1_	PREDICTED: serine protease HTRA1-like [Danio rerio]	11.3955	1.36361	0.742068	1.83758	0.0661237	1	1.0616	6.94275	25.6736	1.80801	5.2668	27.6204
C11787_c0_seq1_	Hexokinase 1 [Danio rerio] emb	59.3085	1.38529	0.75387	1.83757	0.0661251	1	22.2936	47.6074	114.364	24.4081	40.3788	106.799
C5018_c0_seq1_	Heat shock cognate 70 kDa protein [Salmo salar]	249.346	-1.17475	0.639439	-1.83717	0.0661855	1	368.376	208.282	164.544	395.954	229.106	129.816
C23652_c0_seq1_	zinc finger protein 183 [Oncorhynchus mykiss] gb	60.2752	-1.41912	0.772468	-1.83713	0.0661908	1	91.2978	71.4111	14.0038	121.136	50.9124	12.8895
C1033_c8_seq1_	cyclin-G2 [Salmo salar] gb	127.228	-1.28429	0.699183	-1.83685	0.0662327	1	216.567	122.986	51.3471	181.705	128.159	62.6063
C4898_c4_seq1_	TGF-beta receptor type-1 precursor [Danio rerio] gb	94.2926	1.23597	0.672929	1.8367	0.0662536	1	53.0801	108.108	117.865	55.1442	65.8351	165.723
C6901_c0_seq1_	Multisynthetase complex auxiliary component p38 [Osmerus mordax]	24.1748	-1.42541	0.776093	-1.83665	0.066262	1	44.5873	5.95093	17.5047	43.3922	28.0896	5.52409
C16409_c2_seq1_	C1orf149 homolog [Salmo salar]	151.676	-1.26299	0.687781	-1.83633	0.0663086	1	288.756	139.847	63.017	181.705	148.348	88.3854
C86867_c0_seq1_	PREDICTED: protein-S-isoprenylcysteine O-methyltransferase-like [Oreochromis niloticus]	764.768	0.958191	0.521821	1.83624	0.0663218	1	572.203	772.628	737.532	609.298	671.518	1225.43
C8346_c2_seq1_	C16orf14 [Salmo salar]	45.642	-1.4025	0.763796	-1.83622	0.0663254	1	125.269	36.6974	16.3377	43.3922	25.4562	26.6998
C99967_c0_seq1_	PREDICTED: Dmx-like 2 isoform 1 [Equus caballus]	665.746	1.13636	0.618865	1.83619	0.066329	1	350.329	1002.73	424.781	556.866	720.674	939.095
C81092_c0_seq1_	E3 ubiquitin-protein ligase TRIM32 [Danio rerio] gb	57.8589	-1.16999	0.63721	-1.83612	0.0663402	1	78.5585	70.4193	47.8462	54.2402	68.4685	27.6204
C14822_c2_seq1_	PREDICTED: dystrobrevin alpha isoform 3 [Nomascus leucogenys]	22.4795	1.38871	0.756344	1.83608	0.0663462	1	9.55442	26.7792	14.0038	26.2161	12.2892	46.0341
C12514_c1_seq1_	U6 snRNA-associated Sm-like protein LSm4 [Salmo salar]	501.941	1.23306	0.671675	1.8358	0.0663874	1	314.234	358.047	703.689	272.105	395.01	968.557
C37142_c0_seq1_	PREDICTED: UPF0545 protein C22orf39 homolog [Oreochromis niloticus]	90.962	-1.42135	0.774277	-1.83571	0.0664006	1	158.179	82.3211	11.6698	159.105	111.481	23.017
C1278_c0_seq1_	Anterior gradient protein 2 homolog precursor [Caligus clemensi]	36.4562	-1.41547	0.771163	-1.8355	0.0664316	1	101.914	24.7955	38.5104	38.8721	1.7556	12.8895
C75258_c0_seq1_	PREDICTED: protein FAM54B-like [Oreochromis niloticus]	74.2907	1.3302	0.724791	1.83528	0.0664638	1	37.1561	90.2557	98.0264	42.4882	35.112	142.706
C48061_c0_seq1_	PREDICTED: leucine-rich repeat-containing protein 31-like [Danio rerio]	371.903	1.00644	0.548591	1.8346	0.0665653	1	213.382	370.941	441.119	277.529	444.167	484.278
C10902_c3_seq1_	PREDICTED: tax1-binding protein 3-like [Oreochromis niloticus]	1220.14	-0.902993	0.492395	-1.83388	0.0666722	1	1752.7	1297.3	938.252	1259.28	1207.85	865.441
C2672_c8_seq1_	N2,N2-dimethylguanosine tRNA methyltransferase [Salmo salar] gb	1469.12	-0.956169	0.521456	-1.83365	0.0667056	1	1908.76	1504.59	1175.15	1917.39	1418.53	890.299
C66747_c0_seq1_	PREDICTED: urokinase-type plasminogen activator-like [Oreochromis niloticus]	45.8381	-1.37964	0.752411	-1.83363	0.0667094	1	118.899	22.8119	24.5066	45.2002	35.9898	27.6204
C24319_c1_seq1_	Fizzy-related protein homolog [Salmo salar]	38.593	-1.41869	0.77374	-1.83355	0.0667202	1	38.2177	55.542	31.5085	58.7602	44.7678	2.76204
C35209_c2_seq1_	F-box only protein 6 [Osmerus mordax]	269.581	1.359	0.741239	1.83341	0.0667411	1	125.269	253.906	402.608	65.0882	244.906	525.709
C6024_c0_seq1_	vitronectin a precursor [Danio rerio] gb	22.3296	-1.41156	0.770041	-1.8331	0.0667872	1	45.6489	17.8528	2.33396	43.3922	21.0672	3.68273
C13778_c0_seq1_	PREDICTED: mediator of RNA polymerase II transcription subunit 28-like [Oreochromis niloticus]	201.874	-1.12123	0.611942	-1.83224	0.0669151	1	338.651	148.773	264.905	178.993	150.104	129.816
C165400_c0_seq1_	RecName: Full=Maternal embryonic leucine zipper kinase; Short=zMelk; AltName: Full=Protein kinase PK38	35.6889	1.24491	0.679472	1.83218	0.0669247	1	16.9856	32.7301	35.0094	45.2002	28.9674	55.2409
C295649_c0_seq1_	PREDICTED: hypothetical protein LOC100003687 [Danio rerio]	3.75684	-0.992793	0.541893	-1.83208	0.066939	1	18.0472	0	0	3.61601	0.877801	0
C281_c1_seq1_	parvalbumin beta 542 [Salvelinus alpinus]	15.6739	1.42044	0.775406	1.83187	0.0669715	1	6.36961	6.94275	19.8387	8.13603	13.167	39.5893
C32487_c0_seq1_	unnamed protein product [Tetraodon nigroviridis]	45.2987	1.33954	0.731368	1.83155	0.0670187	1	16.9856	39.6728	57.1821	65.9923	21.0672	70.8925
C198665_c0_seq1_	unnamed protein product [Tetraodon nigroviridis]	19.5071	-1.39893	0.763849	-1.83142	0.0670374	1	37.1561	10.91	3.50094	45.2002	18.4338	1.84136
C90916_c0_seq1_	PREDICTED: snRNA-activating protein complex subunit 2-like [Danio rerio]	932.668	1.29602	0.707816	1.83101	0.0670983	1	349.267	1101.91	1455.22	335.385	1073.55	1280.67
C26335_c0_seq1_	PREDICTED: WD repeat domain phosphoinositide-interacting protein 2-like [Oreochromis niloticus]	191.815	-0.993609	0.542657	-1.83101	0.0670994	1	285.571	204.315	152.874	214.249	165.904	127.975
C51002_c0_seq1_	PREDICTED: dynamin-binding protein-like [Oreochromis niloticus]	1090.38	-0.999155	0.545703	-1.83095	0.0671081	1	1325.94	1100.92	875.235	1454.54	1197.32	588.315
C109216_c0_seq1_	centrosomal protein of 135 kDa [Danio rerio] sp	389.775	1.24001	0.677336	1.83071	0.0671433	1	166.671	348.129	710.691	231.425	344.976	536.757
C60152_c0_seq1_	SNF-related serine/threonine-protein kinase [Danio rerio]	118.499	0.99385	0.542954	1.83045	0.067183	1	75.3737	121.994	127.201	99.4404	118.503	168.485
C23958_c0_seq1_	PREDICTED: cleavage and polyadenylation specificity factor subunit 6-like [Oreochromis niloticus]	129.781	-1.17927	0.644335	-1.83021	0.0672191	1	217.628	133.896	68.8519	155.489	126.403	76.4166
C61991_c2_seq1_	protein FAM168B [Danio rerio] sp	562.171	1.14045	0.623174	1.83006	0.0672403	1	311.049	591.125	809.885	323.633	498.591	838.741
C30061_c0_seq1_	PREDICTED: receptor tyrosine-protein kinase erbB-2-like [Oreochromis niloticus]	43.1956	-1.29343	0.706769	-1.83006	0.0672408	1	66.8809	42.6483	23.3396	57.8562	50.0346	18.4136
C98375_c0_seq1_	unnamed protein product [Tetraodon nigroviridis]	31.3394	-1.41952	0.77584	-1.82965	0.0673023	1	63.6961	22.8119	10.5028	66.8963	14.9226	9.20682
C141247_c0_seq1_	PREDICTED: protein deltex-1-like [Oreochromis niloticus]	45.8667	-1.27215	0.695469	-1.8292	0.0673689	1	61.5729	48.5992	31.5085	65.9923	50.0346	17.4929
C89334_c0_seq1_	transmembrane protein 184B [Danio rerio]	323.812	1.19698	0.654542	1.82873	0.0674397	1	153.932	356.064	173.88	303.745	498.591	456.658
C56100_c0_seq1_	BTB/POZ domain-containing protein TNFAIP1 [Osmerus mordax]	391.661	0.938646	0.513313	1.8286	0.0674588	1	248.415	386.81	441.119	308.265	442.412	522.947
C20137_c1_seq1_	N-terminal acetyltransferase complex ARD1 subunit homolog A [Salmo salar] gb	314.696	-1.26421	0.691398	-1.82849	0.067476	1	496.83	292.587	151.707	546.018	252.807	148.23
C12704_c0_seq1_	cystathionine gamma-lyase inhibitor [Oncorhynchus mykiss] gb	1330.95	1.10236	0.602879	1.82849	0.0674766	1	671.994	1476.82	1520.58	806.371	1784.57	1725.36
C9950_c0_seq1_	Coatomer subunit epsilon [Oncorhynchus mykiss]	481.457	-1.12375	0.614617	-1.82837	0.067494	1	624.222	599.06	290.578	629.186	510.002	235.694
C15713_c1_seq1_	PREDICTED: hypothetical protein LOC100489730 [Xenopus (Silurana) tropicalis]	98.622	-1.41926	0.776269	-1.8283	0.067504	1	204.889	49.591	23.3396	242.273	41.2566	30.3825
C10365_c1_seq1_	PREDICTED: ER degradation-enhancing alpha-mannosidase-like 3-like [Oreochromis niloticus]	123.152	-1.08424	0.593181	-1.82785	0.0675723	1	154.994	167.618	106.195	121.136	127.281	61.6857
C69322_c0_seq1_	PREDICTED: tumor protein p53-inducible nuclear protein 2-like [Oreochromis niloticus]	16.462	1.41848	0.776049	1.82782	0.0675767	1	4.24641	6.94275	14.0038	30.7361	8.77801	34.0652
C73868_c0_seq1_	1-acyl-sn-glycerol-3-phosphate acyltransferase zeta [Salmo salar] gb	129.384	-1.20286	0.658091	-1.8278	0.0675802	1	195.335	86.2884	100.36	204.305	124.648	65.3684
C116338_c0_seq1_	condensin-2 complex subunit D3 [Danio rerio] gb	16.3182	-1.41859	0.776245	-1.82751	0.0676234	1	42.4641	24.7955	8.16886	8.13603	7.90021	6.44477
C26845_c0_seq1_	nucleoporin 88 [Danio rerio]	203.866	1.12806	0.617292	1.82744	0.0676344	1	117.838	176.544	294.079	137.409	185.216	312.111
C39868_c1_seq1_	Choline transporter-like protein 2 [Salmo salar]	10.5123	1.41661	0.775224	1.82735	0.0676466	1	2.1232	15.8691	10.5028	8.13603	5.2668	21.1757
C79600_c3_seq1_	novel protein [Danio rerio]	31.0822	-1.29666	0.709627	-1.82724	0.0676637	1	56.2649	18.8446	31.5085	35.2561	28.9674	15.6516
C34893_c0_seq1_	PREDICTED: sorting nexin-5-like [Oreochromis niloticus]	428.857	1.17597	0.643684	1.82693	0.0677097	1	249.476	324.325	596.327	235.041	459.968	708.004
C121224_c0_seq1_	PREDICTED: UDP-glucose dehydrogenase [Oryctolagus cuniculus]	13.3975	1.32859	0.727302	1.82674	0.0677394	1	0	16.861	1.16698	9.94404	20.1894	32.2239
C45805_c1_seq1_	PREDICTED: pleckstrin homology domain-containing family G member 3-like [Oreochromis niloticus]	42.3347	-1.34225	0.734793	-1.82671	0.0677437	1	92.3594	23.8037	1.16698	80.4563	55.3014	0.920682
C5699_c0_seq1_	PREDICTED: peptidyl-prolyl cis-trans isomerase FKBP1A-like [Oreochromis niloticus]	136.191	-1.32358	0.724588	-1.82666	0.0677512	1	216.567	135.879	46.6792	220.577	142.204	55.2409
C69047_c0_seq1_	Uncharacterized Protein [Dicentrarchus labrax]	2.19124	1.12035	0.613354	1.8266	0.0677606	1	0	0.991821	1.16698	0.904003	0.877801	9.20682
C33527_c1_seq1_	PREDICTED: GTP-binding protein 2-like [Oreochromis niloticus]	184.464	-1.14038	0.624391	-1.82638	0.0677927	1	226.121	176.544	239.231	248.601	133.426	82.8613
C125762_c0_seq1_	PREDICTED: ras GTPase-activating-like protein IQGAP3-like [Oreochromis niloticus]	2654.44	0.936735	0.512981	1.82606	0.0678408	1	1904.51	2727.51	2986.3	2057.51	2255.07	3995.76
C83268_c0_seq1_	PREDICTED: 80 kDa MCM3-associated protein [Monodelphis domestica]	217.21	-1.11387	0.609996	-1.82603	0.067846	1	290.879	215.225	142.372	243.177	300.208	111.402
C4889_c0_seq1_	PREDICTED: rho GTPase-activating protein 10 [Oreochromis niloticus]	2376.95	1.31095	0.718103	1.82557	0.0679151	1	840.789	2627.33	890.406	2240.12	4424.12	3238.96
C52583_c0_seq1_	PREDICTED: caprin-2-like [Oreochromis niloticus]	172.068	-0.926277	0.507405	-1.82552	0.0679232	1	240.984	186.462	158.709	158.201	172.049	116.006
C70279_c0_seq1_	PREDICTED: vimentin-type intermediate filament-associated coiled-coil protein-like [Danio rerio]	68.6507	-1.28946	0.706534	-1.82505	0.0679939	1	143.316	55.542	79.3547	33.4481	58.8126	41.4307
C24381_c0_seq1_	nonclassical MHC class I antigen [Oncorhynchus mykiss] gb	242.626	-1.28572	0.70449	-1.82504	0.0679954	1	433.134	221.176	98.0264	386.009	193.116	124.292
C19761_c0_seq1_	PREDICTED: activating molecule in BECN1-regulated autophagy protein 1 [Oreochromis niloticus]	58.4049	-1.25087	0.68542	-1.82496	0.0680064	1	117.838	64.4684	39.6773	41.5842	50.0346	36.8273
C58134_c0_seq1_	unnamed protein product [Tetraodon nigroviridis]	34.2331	-1.27399	0.698416	-1.82411	0.0681349	1	48.8337	29.7546	47.8462	37.0641	28.0896	13.8102
C25263_c0_seq1_	PREDICTED: echinoderm microtubule-associated protein-like 4-like [Oreochromis niloticus]	7.44535	-1.32868	0.728452	-1.82397	0.0681559	1	24.4168	1.98364	1.16698	11.752	3.5112	1.84136
C118814_c1_seq1_	PREDICTED: probable G-protein coupled receptor 157-like [Oreochromis niloticus]	1375.12	0.885136	0.485323	1.82381	0.068181	1	977.735	1133.65	1450.56	1216.79	1524.74	1947.24
C48282_c0_seq1_	PREDICTED: run domain Beclin-1 interacting and cystein-rich containing protein-like, partial [Oreochromis niloticus]	180.306	1.21356	0.665571	1.82334	0.0682512	1	107.222	148.773	263.738	127.464	111.481	323.159
C204454_c0_seq1_	unnamed protein product [Tetraodon nigroviridis]	99.6288	1.19686	0.656482	1.82314	0.0682818	1	43.5257	120.01	101.527	63.2802	138.693	130.737
C42366_c0_seq1_	uncharacterized protein LOC550591 [Danio rerio] gb	84.2066	-1.04096	0.571038	-1.82293	0.0683141	1	115.715	93.2312	93.3585	78.6483	75.4909	48.7961
C167444_c1_seq1_	PREDICTED: transmembrane and coiled-coil domain-containing protein 4-like [Oreochromis niloticus]	19.068	1.41396	0.77566	1.82292	0.068316	1	5.30801	17.8528	33.8424	4.52002	10.5336	42.3513
C37596_c0_seq1_	PREDICTED: predicted protein-like [Saccoglossus kowalevskii]	161.792	-1.18963	0.6526	-1.82291	0.0683172	1	272.832	138.855	109.696	240.465	114.992	93.9095
C66120_c1_seq1_	PREDICTED: hypothetical protein LOC100535483 [Danio rerio]	111.846	-1.37727	0.755637	-1.82266	0.0683556	1	291.941	51.5747	81.6886	137.409	41.2566	67.2098
C38956_c0_seq1_	PREDICTED: A disintegrin and metalloproteinase with thrombospondin motifs 19 [Gallus gallus]	285.715	-1.02336	0.56165	-1.82205	0.0684471	1	390.669	298.538	203.055	288.377	365.165	168.485
C39241_c0_seq1_	PREDICTED: ubiquitin carboxyl-terminal hydrolase 34 [Danio rerio]	112.608	1.24649	0.684141	1.82198	0.0684584	1	47.7721	160.675	57.1821	143.737	108.847	157.437
C35170_c0_seq1_	PREDICTED: transcription factor IIIA-like [Oreochromis niloticus]	72.3626	-1.40475	0.771068	-1.82183	0.0684808	1	160.302	65.4602	30.3415	130.176	18.4338	29.4618
C175024_c0_seq1_	PREDICTED: homeodomain-interacting protein kinase 1 [Oreochromis niloticus]	19.0566	-1.35409	0.743327	-1.82166	0.068506	1	36.0945	13.8855	15.1707	18.0801	22.8228	8.28613
C68959_c0_seq1_	PREDICTED: pre-mRNA-splicing factor ATP-dependent RNA helicase PRP16-like [Oreochromis niloticus]	76.4917	-1.40957	0.773822	-1.82157	0.0685198	1	89.1746	108.108	49.0132	127.464	84.2689	0.920682
C60713_c0_seq1_	Vasa [Oncorhynchus mykiss] dbj	73.3028	1.32272	0.726155	1.82153	0.0685257	1	21.232	89.2639	74.6868	40.6802	124.648	89.3061
C45020_c0_seq1_	PREDICTED: sickle tail protein homolog [Danio rerio]	65.5388	1.34787	0.739981	1.82149	0.0685327	1	38.2177	44.6319	86.3566	33.4481	37.7454	152.833
C51063_c1_seq1_	dehydrodolichyl diphosphate synthase [Oncorhynchus mykiss] emb	456.792	-0.86114	0.472832	-1.82124	0.0685707	1	625.284	457.229	411.944	507.146	417.833	321.318
C27518_c0_seq1_	myotubularin-related protein 6 [Salmo salar] gb	260.375	-1.26251	0.693227	-1.82121	0.0685755	1	431.01	217.209	129.535	450.194	205.405	128.895
C26206_c2_seq1_	PREDICTED: uncharacterized protein C17orf63 homolog [Oreochromis niloticus]	55.9563	1.38811	0.762265	1.82104	0.0686011	1	6.36961	75.3784	85.1896	48.8162	69.3463	50.6375
C124547_c0_seq1_	PREDICTED: collagen alpha-1(XIV) chain-like [Oreochromis niloticus]	494.517	1.03618	0.569033	1.82095	0.0686138	1	290.879	524.673	640.672	329.057	496.835	684.987
C125782_c0_seq1_	PREDICTED: retrotransposable element Tf2 155 kDa protein type 1-like [Danio rerio]	501.586	-1.23614	0.678872	-1.82087	0.0686273	1	773.908	362.015	368.766	921.18	340.587	243.06
C49436_c1_seq1_	Angio-associated migratory cell protein [Salmo salar]	65.3707	1.1985	0.658266	1.82069	0.0686539	1	27.6016	86.2884	74.6868	47.0082	72.8575	83.782
C25_c189_seq1_	unnamed protein product [Tetraodon nigroviridis]	26.2731	1.37062	0.752806	1.82069	0.0686547	1	9.55442	25.7873	15.1707	18.0801	43.0122	46.0341
C850_c0_seq1_	basic transcription factor 3-1 [Salmo salar] ref	122.152	-1.39281	0.76512	-1.82039	0.0687001	1	128.454	123.978	52.5141	259.449	150.104	18.4136
C11868_c2_seq1_	SUMO-conjugating enzyme UBC9 [Salmo salar]	1053.83	-0.976692	0.536562	-1.82028	0.0687166	1	1721.92	1008.68	774.875	1090.23	941.002	786.262
C47889_c5_seq1_	fimbriae-associated protein Fap1 [Streptococcus parasanguinis]	29.9575	1.37854	0.75746	1.81995	0.0687661	1	2.1232	20.8282	54.8481	1.80801	42.1344	58.0029
C243693_c0_seq1_	protocadherin-15-CD3 isoform 6 [Gallus gallus]	28.1298	1.40583	0.772469	1.81992	0.0687709	1	8.49282	30.7464	40.8443	6.32802	28.9674	53.3995
C21180_c4_seq1_	PREDICTED: guanine nucleotide-binding protein G(q) subunit alpha-like isoform 3 [Oreochromis niloticus]	1462.94	1.00046	0.549808	1.81966	0.0688106	1	836.542	1598.82	1261.51	1175.2	2015.43	1890.16
C43634_c0_seq1_	SAPS domain family, member 3 [Salmo salar] gb	773.346	0.812559	0.44657	1.81956	0.0688268	1	549.91	773.62	779.543	695.179	819.866	1021.96
C17647_c0_seq1_	Mps one binder kinase activator-like 2 [Osmerus mordax]	1516.16	-0.865643	0.475778	-1.81943	0.0688462	1	1984.13	1683.12	1531.08	1651.61	1232.43	1014.59
C33926_c2_seq1_	novel protein similar to human and mouse l(3)mbt-like 3 (Drosophila) (L3MBTL3) [Danio rerio]	80.1327	-1.35014	0.742091	-1.81937	0.068855	1	109.345	97.1984	29.1745	88.5923	132.548	23.9377
C38170_c0_seq1_	DNA-directed RNA polymerase I subunit D [Oncorhynchus mykiss] gb	213.06	-1.23389	0.678416	-1.81878	0.0689446	1	254.784	249.939	116.698	310.073	268.607	78.2579
C10698_c0_seq1_	cytochrome b558 alpha-subunit [Oncorhynchus mykiss] gb	147.446	-1.18629	0.652284	-1.81868	0.0689606	1	257.969	103.149	130.702	206.113	97.4359	89.3061
C49802_c0_seq1_	Mki67 protein [Dicentrarchus labrax]	650.795	1.10388	0.607015	1.81853	0.0689828	1	311.049	601.043	465.625	973.612	748.764	804.676
C5139_c2_seq1_	PREDICTED: myosin-9-like [Oreochromis niloticus]	338.447	0.86018	0.473053	1.81836	0.0690094	1	231.429	356.064	358.263	335.385	299.33	450.213
C20800_c1_seq1_	xenotropic and polytropic retrovirus receptor 1 homolog [Danio rerio] sp	94.9097	-1.10744	0.609071	-1.81825	0.0690256	1	135.885	101.166	115.531	99.4404	64.9573	52.4788
C80118_c0_seq1_	Leucine-rich repeat-containing protein 3B [Dicentrarchus labrax]	10.1941	-1.33879	0.736308	-1.81824	0.0690274	1	25.4784	1.98364	2.33396	20.7921	9.65581	0.920682
C54312_c0_seq1_	PREDICTED: protein FAM46A-like [Oreochromis niloticus]	99.7188	-1.19797	0.658873	-1.81821	0.0690313	1	112.53	150.757	107.362	103.056	87.7801	36.8273
C134054_c0_seq1_	novel protein similar to H.sapiens TSC22 domain family, member (zgc:85857) [Danio rerio]	10.3198	-1.25914	0.692523	-1.8182	0.0690337	1	28.6633	5.95093	1.16698	23.5041	2.6334	0
C50693_c0_seq1_	PREDICTED: endoplasmic reticulum aminopeptidase 2-like [Oreochromis niloticus]	10.0253	1.22586	0.67425	1.81812	0.0690465	1	1.0616	0	1.16698	5.42402	18.4338	34.0652
C11244_c1_seq1_	Pre-mRNA-splicing factor syf2 [Salmo salar] gb	569.186	1.15337	0.63446	1.81788	0.0690831	1	347.144	481.033	820.387	329.057	483.668	953.826
C124092_c0_seq1_	PREDICTED: RING finger protein 26 [Danio rerio]	225.902	-1.23128	0.677336	-1.81783	0.0690904	1	426.764	177.536	187.884	313.689	112.358	137.182
C31067_c1_seq1_	PREDICTED: glutamate [NMDA] receptor-associated protein 1-like [Oreochromis niloticus]	916.082	0.794592	0.437146	1.81768	0.0691127	1	638.023	876.77	933.585	894.963	986.648	1166.5
C14008_c1_seq1_	PREDICTED: hypothetical protein LOC100702458 [Oreochromis niloticus]	12.0643	-1.39588	0.767987	-1.81758	0.0691288	1	22.2936	11.9019	14.0038	10.848	9.65581	3.68273
C3240_c1_seq1_	PREDICTED: hypothetical protein LOC100693386 [Oreochromis niloticus]	148.787	-1.03994	0.572187	-1.81748	0.0691434	1	245.23	164.642	126.034	120.232	132.548	104.037
C9571_c0_seq1_	glycogen [starch] synthase, muscle [Danio rerio] gb	174.549	-1.1201	0.616403	-1.81716	0.069193	1	282.386	168.61	113.197	231.425	143.959	107.72
C145631_c0_seq1_	PREDICTED: vigilin-like [Oreochromis niloticus]	40.2794	1.19093	0.655415	1.81706	0.0692081	1	20.1704	39.6728	49.0132	34.3521	38.6232	59.8443
C45546_c0_seq1_	Ubiquitin-conjugating enzyme E2 R2 [Salmo salar] gb	116.107	0.984516	0.541873	1.81688	0.069236	1	70.0657	121.994	100.36	128.368	120.259	155.595
C51094_c0_seq1_	PREDICTED: hypothetical protein LOC100690204 [Oreochromis niloticus]	51.5119	1.30351	0.7175	1.81674	0.0692566	1	25.4784	71.4111	54.8481	37.9681	25.4562	93.9095
C48493_c0_seq1_	translocation protein SEC62 [Danio rerio] gb	16.0104	1.39814	0.769703	1.81647	0.069298	1	0	16.861	22.1726	22.6001	11.4114	23.017
C93660_c0_seq1_	PREDICTED: heparan sulfate glucosamine 3-O-sulfotransferase 1-like [Oreochromis niloticus]	90.8876	-1.14609	0.630947	-1.81646	0.0692997	1	114.653	98.1903	66.5179	114.808	109.725	41.4307
C1491_c10_seq1_	PREDICTED: myosin-11-like [Oreochromis niloticus]	237.255	1.14667	0.631272	1.81644	0.0693022	1	105.099	220.184	254.402	178.089	374.821	290.935
C176576_c0_seq1_	zinc finger protein 704 [Danio rerio] sp	16.0751	1.39678	0.769096	1.81613	0.0693503	1	5.30801	24.7955	12.8368	9.04003	13.167	31.3032
C52828_c0_seq1_	PREDICTED: hypothetical protein LOC100536078 [Danio rerio]	213.069	1.09284	0.601825	1.81588	0.0693881	1	106.16	303.497	171.546	178.993	247.54	270.68
C5004_c0_seq1_	Leydig cell tumor 10 kDa protein [Oncorhynchus mykiss] gb	7.02633	-1.35905	0.74851	-1.81567	0.0694212	1	14.8624	9.91821	5.8349	4.52002	7.02241	0
C63945_c0_seq1_	CC001 protein [Salmo salar] gb	13.1026	-1.40171	0.772058	-1.81555	0.0694393	1	28.6633	2.97546	12.8368	22.6001	8.77801	2.76204
C98595_c0_seq1_	Alpha-N-acetylgalactosaminide alpha-2,6-sialyltransferase 2 [Osmerus mordax]	11.0998	-1.40756	0.775373	-1.81533	0.0694729	1	18.0472	10.91	8.16886	14.4641	13.167	1.84136
C154643_c0_seq1_	PREDICTED: hypothetical protein LOC100708756 [Oreochromis niloticus]	7.01492	1.2959	0.714159	1.81459	0.0695875	1	1.0616	6.94275	1.16698	9.94404	0.877801	22.0964
C75297_c0_seq1_	unnamed protein product [Tetraodon nigroviridis]	356.569	-0.855818	0.471692	-1.81436	0.0696223	1	479.844	327.301	334.923	395.05	354.632	247.663
C45089_c2_seq1_	PREDICTED: large neutral amino acids transporter small subunit 2 [Danio rerio]	111.658	-1.07158	0.59066	-1.81421	0.0696459	1	165.61	98.1903	81.6886	122.944	134.304	67.2098
C97412_c0_seq1_	PREDICTED: lysine-specific demethylase 4C-like [Oreochromis niloticus]	26.6204	-1.32188	0.729066	-1.81311	0.0698143	1	41.4025	23.8037	18.6717	26.2161	39.501	10.1275
C569_c29_seq1_	40S ribosomal protein S15 [Salmo salar] gb	71.0732	-1.27593	0.703728	-1.8131	0.0698166	1	98.729	58.5174	40.8443	111.192	89.5357	27.6204
C8817_c0_seq1_	Bifunctional purine biosynthesis protein PURH [Salmo salar] gb	2941.32	-0.91417	0.504246	-1.81295	0.0698401	1	3684.82	3165.89	2371.3	3659.41	2974.87	1791.65
C40549_c0_seq1_	PREDICTED: rho GTPase-activating protein 10 [Oreochromis niloticus]	3612.58	1.25119	0.690144	1.81294	0.0698404	1	1523.4	3749.08	1760.97	2905.47	6659	5077.56
C126696_c0_seq1_	PREDICTED: probable ATP-dependent RNA helicase DDX31 isoform 1 [Danio rerio] emb	964.928	0.945763	0.521754	1.81266	0.0698843	1	632.715	954.132	1082.96	688.851	1086.72	1344.2
C34446_c0_seq1_	SUMO-activating enzyme subunit 2 [Salmo salar] gb	267.04	1.03007	0.568282	1.8126	0.069894	1	150.747	266.8	313.918	188.937	328.297	353.542
C22441_c3_seq1_	hypothetical protein VOLCADRAFT 63308 [Volvox carteri f. nagariensis] gb	829.983	0.814478	0.449374	1.81247	0.0699134	1	580.696	732.956	877.569	832.587	874.29	1081.8
C77055_c0_seq1_	PREDICTED: zinc finger protein 347-like [Monodelphis domestica]	126.909	-1.19876	0.661537	-1.81208	0.0699731	1	195.335	78.3538	101.527	197.977	122.892	65.3684
C47728_c0_seq1_	Si:ch211-142e24.2 protein [Danio rerio]	2.99044	0.957089	0.528189	1.81202	0.0699831	1	0	0	2.33396	0	0.877801	14.7309
C12450_c0_seq1_	hypothetical protein YPH 0521 [Yersinia pestis biovar Orientalis str. PEXU2] ref	14.3262	1.3656	0.753682	1.8119	0.0700015	1	1.0616	9.91821	33.8424	9.04003	2.6334	29.4618
C21741_c1_seq1_	PREDICTED: arrestin domain-containing protein 1-like, partial [Oreochromis niloticus]	370.962	-1.05594	0.582811	-1.81181	0.070015	1	657.132	286.636	313.918	404.09	290.552	273.442
C75987_c1_seq1_	PREDICTED: hypothetical protein LOC100334805 [Danio rerio]	25.2715	-1.38548	0.764713	-1.81177	0.0700219	1	52.0185	21.8201	8.16886	23.5041	35.9898	10.1275
C25043_c0_seq1_	PREDICTED: protein deltex-4-like [Oreochromis niloticus]	27.7066	-1.39311	0.768937	-1.81174	0.0700268	1	40.3409	54.5501	9.33585	18.0801	43.0122	0.920682
C494_c0_seq1_	RecName: Full=Elastase-1 pdb	19.275	-1.40117	0.773471	-1.81153	0.0700582	1	25.4784	14.8773	35.0094	22.6001	14.9226	2.76204
C69352_c0_seq1_	sorting nexin-14 [Salmo salar] gb	69.1588	-1.26142	0.69636	-1.81144	0.0700722	1	87.0514	65.4602	49.0132	115.712	72.8575	24.8584
C64222_c0_seq1_	PREDICTED: protein rogdi homolog [Oreochromis niloticus]	709.396	1.09756	0.605934	1.81135	0.0700864	1	431.01	797.424	848.395	384.201	696.974	1098.37
C158609_c0_seq1_	novel protein similar to vertebrate Mdm4, transformed 3T3 cell double minute 1, p53 binding protein (mouse) (MDM1) [Danio rerio]	44.8115	1.30992	0.723213	1.81126	0.0701012	1	15.924	57.5256	47.8462	22.6001	61.4461	63.527
C20873_c2_seq1_	PREDICTED: CCR4-NOT transcription complex subunit 10-like [Oreochromis niloticus]	77.34	-1.29639	0.715744	-1.81125	0.0701024	1	131.639	121.994	35.0094	57.8562	81.6355	35.9066
C840_c1_seq1_	isocitrate dehydrogenase 2-1 (NADP+), mitochondrial [Salmo salar] gb	45.5437	-1.20093	0.663062	-1.81119	0.0701121	1	66.8809	37.6892	36.1764	54.2402	56.1792	22.0964
C15762_c1_seq1_	Poly polymerase 12 [Salmo salar] gb	39.7023	1.20141	0.663385	1.81103	0.0701368	1	18.0472	39.6728	51.3471	36.1601	37.7454	55.2409
C2583_c0_seq1_	NADH dehydrogenase 1 beta subcomplex subunit 2, mitochondrial precursor [Salmo salar] gb	223.689	-1.10813	0.611893	-1.81099	0.0701428	1	297.249	284.653	152.874	298.321	194.872	114.165
C15794_c2_seq1_	PREDICTED: probable phospholipid-transporting ATPase IC-like [Oreochromis niloticus]	2545.82	0.866723	0.478643	1.81079	0.0701728	1	1822.77	2878.26	2184.59	2173.22	2646.57	3569.48
C53319_c0_seq1_	PREDICTED: kelch-like protein 20-like isoform 2 [Oreochromis niloticus]	9.31887	1.21257	0.669744	1.8105	0.0702183	1	3.18481	0	2.33396	10.848	0.877801	38.6686
C23547_c0_seq1_	Mediator of RNA polymerase II transcription subunit 9 [Salmo salar] gb	185.35	1.0617	0.586425	1.81046	0.0702253	1	107.222	190.43	212.39	121.136	219.45	261.474
C5931_c6_seq1_	PREDICTED: zona pellucida sperm-binding protein 4-like [Danio rerio]	316.937	1.32509	0.731914	1.81045	0.0702263	1	99.7906	293.579	644.173	128.368	318.642	417.069
C109228_c0_seq1_	Gamma-glutamyl hydrolase precursor [Salmo salar]	19.3321	1.39008	0.767962	1.81009	0.0702812	1	3.18481	18.8446	25.6736	14.4641	28.9674	24.8584
C114169_c0_seq1_	ATP-dependent RNA helicase DDX19B [Gallus gallus] emb	5.5974	1.34599	0.743628	1.81003	0.0702916	1	0	5.95093	5.8349	4.52002	4.389	12.8895
C21767_c0_seq1_	PREDICTED: zinc finger protein 729-like [Anolis carolinensis]	298.029	-0.96175	0.531347	-1.81002	0.0702922	1	404.47	308.456	229.895	367.025	291.43	186.898
C12361_c0_seq1_	branched chain ketoacid dehydrogenase E1 beta polypeptide [Salmo salar]	721.514	-1.09799	0.606635	-1.80996	0.0703016	1	1133.79	621.872	483.13	1050.45	595.149	444.689
C10762_c0_seq1_	PREDICTED: zinc finger protein 513-like [Oreochromis niloticus]	374.286	0.864629	0.477767	1.80973	0.0703379	1	263.277	363.006	389.772	319.113	395.888	514.661
C46138_c0_seq1_	PREDICTED: non-lysosomal glucosylceramidase-like [Oreochromis niloticus]	35.5568	-1.38484	0.765255	-1.80964	0.0703517	1	67.9425	41.6565	8.16886	36.1601	46.5234	12.8895
C246119_c0_seq1_	PREDICTED: transcription initiation factor TFIID subunit 4B [Gallus gallus]	14.3762	-1.40042	0.773905	-1.80955	0.0703649	1	19.1088	13.8855	14.0038	18.9841	18.4338	1.84136
C45096_c1_seq1_	Fragile X mental retardation, autosomal homolog 2 [Danio rerio]	9.85631	1.29595	0.716223	1.80942	0.0703862	1	1.0616	21.8201	2.33396	5.42402	0.877801	27.6204
C25136_c1_seq1_	PREDICTED: protein phosphatase 1 regulatory subunit 3C-B-like [Oreochromis niloticus]	1191.15	1.04973	0.580212	1.80922	0.0704168	1	740.998	938.263	1715.46	1069.44	906.768	1775.99
C3994_c0_seq1_	WD repeat and SOCS box-containing protein 1 [Danio rerio] sp	29.2955	1.28463	0.710061	1.80918	0.0704229	1	13.8008	26.7792	18.6717	33.4481	33.3564	49.7168
C14487_c0_seq1_	PREDICTED: membrane-spanning 4-domains subfamily A member 4A-like [Oreochromis niloticus]	58.6956	1.23117	0.680563	1.80905	0.0704431	1	20.1704	79.3457	75.8537	56.0482	53.5458	67.2098
C2454_c1_seq1_	PREDICTED: striatin-4-like [Oreochromis niloticus]	17.6881	1.34168	0.741649	1.80905	0.0704437	1	7.43121	17.8528	17.5047	13.5601	17.556	32.2239
C18886_c0_seq1_	Transient receptor potential cation channel subfamily M member 4 [Dicentrarchus labrax]	90.5738	1.00444	0.55524	1.80902	0.0704473	1	58.3881	95.2148	81.6886	91.3043	84.2689	132.578
C10362_c0_seq1_	Churchill protein [Salmo salar] gb	48.3641	-1.39947	0.773725	-1.80874	0.0704906	1	54.1417	27.771	35.0094	63.2802	104.458	5.52409
C187411_c0_seq1_	PREDICTED: cadherin EGF LAG seven-pass G-type receptor 2 [Oreochromis niloticus]	44.9985	-1.38712	0.766928	-1.80867	0.070502	1	105.099	19.8364	23.3396	76.8403	23.7006	21.1757
C4701_c3_seq1_	unnamed protein product [Tetraodon nigroviridis]	922.374	0.933507	0.516146	1.80861	0.0705114	1	684.733	848.999	748.035	791.907	1026.15	1434.42
C82937_c0_seq1_	PREDICTED: transmembrane protein 87A-like [Oreochromis niloticus]	483.519	0.940962	0.520285	1.80855	0.0705208	1	340.774	497.894	550.815	389.625	402.033	719.973
C15170_c7_seq1_	PREDICTED: ETS-related transcription factor Elf-2-like [Oreochromis niloticus]	16.2936	1.39169	0.76956	1.80842	0.0705411	1	4.24641	7.93457	15.1707	22.6001	20.1894	27.6204
C61388_c0_seq1_	PREDICTED: inaD-like protein [Gallus gallus]	99.426	-1.24741	0.689792	-1.80839	0.0705459	1	160.302	74.3866	78.1877	169.049	65.8351	48.7961
C188637_c0_seq1_	Cysteine/serine-rich nuclear protein 1 [Dicentrarchus labrax]	282.095	0.96163	0.531887	1.80796	0.070613	1	194.273	274.734	282.409	208.825	312.497	419.831
C24459_c2_seq1_	PREDICTED: c2 domain-containing protein 3 [Danio rerio]	585.264	1.08648	0.600978	1.80785	0.0706298	1	312.111	639.724	365.265	580.37	826.011	788.103
C48428_c1_seq1_	vacuolar protein sorting-associated protein 8 homolog [Danio rerio]	31.153	-1.40073	0.774808	-1.80784	0.0706307	1	37.1561	40.6647	61.85	23.5041	22.8228	0.920682
C17894_c0_seq1_	PREDICTED: 3-hydroxyacyl-CoA dehydratase 1 isoform 2 [Danio rerio]	54.5084	1.19893	0.663245	1.80767	0.0706575	1	32.9097	55.542	58.349	35.2561	47.4012	97.5922
C163192_c1_seq1_	unnamed protein product [Tetraodon nigroviridis]	26.3464	-1.34058	0.741685	-1.80747	0.0706888	1	55.2033	40.6647	1.16698	45.2002	14.9226	0.920682
C13526_c2_seq1_	PREDICTED: transmembrane protein 106B-like [Oreochromis niloticus]	124.162	-1.12986	0.625165	-1.8073	0.0707156	1	227.183	95.2148	86.3566	135.601	114.992	85.6234
C33730_c0_seq1_	PREDICTED: polypyrimidine tract-binding protein 1-like [Oreochromis niloticus]	275.248	-1.27701	0.706704	-1.807	0.0707622	1	526.555	304.489	91.0245	237.753	338.831	152.833
C121388_c0_seq1_	PREDICTED: integral membrane protein GPR180-like [Oreochromis niloticus]	67.052	1.20282	0.665722	1.80679	0.0707949	1	41.4025	57.5256	78.1877	60.5682	41.2566	123.371
C9043_c0_seq1_	PREDICTED: rab GTPase-activating protein 1 [Danio rerio]	33.7852	-1.40236	0.776204	-1.80669	0.0708106	1	43.5257	38.681	10.5028	64.1842	42.1344	3.68273
C27528_c0_seq1_	novel protein (zgc:56556) [Danio rerio]	693.857	1.29163	0.714984	1.80651	0.0708383	1	348.205	493.927	1297.68	351.657	420.467	1251.21
C97086_c0_seq1_	nicotinic acetylcholine receptor epsilon subunit [Takifugu rubripes]	95.9378	1.10105	0.60958	1.80624	0.0708813	1	62.6345	86.2884	89.8575	67.8003	108.847	160.199
C39194_c0_seq1_	calcium-binding protein [Dictyostelium discoideum AX4] sp	173.592	-1.38761	0.768283	-1.80612	0.0708992	1	338.651	212.25	149.374	254.929	22.8228	63.527
C54993_c0_seq1_	PREDICTED: PPPDE peptidase domain-containing protein 2-like [Oreochromis niloticus]	30.9076	-1.39084	0.770141	-1.80596	0.0709247	1	45.6489	78.3538	19.8387	9.04003	30.723	1.84136
C5882_c1_seq1_	Coiled-coil domain-containing protein 124 [Salmo salar] gb	172.951	-1.04547	0.578927	-1.80588	0.0709374	1	222.936	171.585	129.535	218.769	201.894	92.9888
C45682_c1_seq1_	PREDICTED: zinc finger FYVE domain-containing protein 1-like [Oreochromis niloticus]	497.581	0.883221	0.4891	1.80581	0.0709482	1	342.897	525.665	420.113	447.482	566.181	683.146
C110708_c0_seq1_	histone deacetylase 10 [Danio rerio] gb	188.007	-1.2741	0.705697	-1.80544	0.0710052	1	273.893	153.732	126.034	370.641	126.403	77.3372
C46325_c2_seq1_	PREDICTED: ATPase family AAA domain-containing protein 3-A-like [Oreochromis niloticus]	10.8498	-1.37062	0.759197	-1.80536	0.0710187	1	22.2936	20.8282	2.33396	9.94404	8.77801	0.920682
C3997_c6_seq1_	Leucine-rich repeats and immunoglobulin-like domains protein 2 [Dicentrarchus labrax]	6.13638	-1.15137	0.637757	-1.80535	0.07102	1	22.2936	1.98364	3.50094	9.04003	0	0
C81417_c0_seq1_	PREDICTED: protein ZNF365-like [Danio rerio]	49.8261	-1.16667	0.646253	-1.80529	0.0710298	1	71.1273	41.6565	59.516	59.6642	42.1344	24.8584
C119497_c0_seq1_	PREDICTED: mitogen-activated protein kinase kinase kinase 3 [Oreochromis niloticus]	38.1026	1.37843	0.76357	1.80525	0.0710355	1	16.9856	54.5501	14.0038	18.0801	42.1344	82.8613
C6631_c0_seq1_	cellular tumor antigen p53 [Oncorhynchus mykiss] sp	75.9293	-1.38764	0.768831	-1.80486	0.0710959	1	94.4826	140.839	21.0057	98.5364	86.9023	13.8102
C168671_c0_seq1_	PREDICTED: protein QN1 homolog [Danio rerio]	216.485	-1.0647	0.589906	-1.80486	0.0710967	1	304.68	195.389	154.041	301.937	218.572	124.292
C17619_c0_seq1_	PREDICTED: tuberin-like [Oreochromis niloticus]	341.15	-1.01439	0.562089	-1.80468	0.0711247	1	515.939	252.914	401.441	385.105	266.851	224.646
C153149_c0_seq1_	PREDICTED: protein MICAL-2, partial [Danio rerio]	219.161	0.921491	0.51066	1.80451	0.0711516	1	156.055	184.479	203.055	230.521	217.695	323.159
C74311_c0_seq1_	prolactin receptor precursor [Oncorhynchus mykiss] gb	31.1253	-1.36025	0.75387	-1.80436	0.071175	1	54.1417	22.8119	4.66792	82.2643	21.945	0.920682
C15409_c1_seq1_	UBX domain-containing protein 6 [Oncorhynchus mykiss] gb	6.48527	1.21163	0.671567	1.80418	0.0712029	1	1.0616	3.96728	1.16698	0	8.77801	23.9377
C4290_c4_seq1_	PREDICTED: puromycin-sensitive aminopeptidase [Oreochromis niloticus]	137.751	-1.17793	0.652968	-1.80397	0.0712366	1	215.505	151.749	68.8519	175.377	140.448	74.5752
C134306_c0_seq1_	transmembrane protein 17 [Danio rerio] gb	197.009	1.0083	0.558966	1.80386	0.0712535	1	131.639	196.381	213.557	203.401	136.937	300.142
C2412_c0_seq1_	Four and a half LIM domains protein 1 [Salmo salar] gb	126.937	-1.23005	0.682042	-1.80348	0.0713136	1	169.856	160.675	73.5198	198.881	106.214	52.4788
C39751_c0_seq1_	Fructose-1,6-bisphosphatase 1 [Salmo salar]	53.7725	-1.19911	0.66498	-1.80323	0.0713523	1	67.9425	43.6401	56.0151	74.1283	58.8126	22.0964
C16791_c0_seq1_	PREDICTED: splicing factor 1-like isoform 2 [Oreochromis niloticus]	443.99	-0.990651	0.549391	-1.80318	0.0713597	1	494.706	457.229	424.781	507.146	560.037	220.043
C85_c0_seq1_	PREDICTED: actin, cytoplasmic 1-like [Monodelphis domestica]	365.665	-1.24413	0.690012	-1.80306	0.0713792	1	409.778	533.6	192.552	452.906	484.546	120.609
C44286_c0_seq1_	ras-related protein Rab-11B [Danio rerio] ref	15.1858	1.39855	0.775733	1.80287	0.0714089	1	1.0616	9.91821	23.3396	18.9841	17.556	20.255
C45686_c1_seq1_	PREDICTED: hypothetical protein LOC100710486 [Oreochromis niloticus]	176.917	-0.931291	0.516632	-1.80262	0.0714482	1	269.647	167.618	158.709	166.337	170.293	128.895
C197421_c0_seq1_	PREDICTED: calmodulin-regulated spectrin-associated protein 1-B-like [Oreochromis niloticus]	40.0858	-1.34518	0.746342	-1.80237	0.0714878	1	88.113	53.5583	35.0094	18.0801	24.5784	21.1757
C291868_c0_seq1_	PREDICTED: voltage-dependent T-type calcium channel subunit alpha-1I [Oreochromis niloticus]	28.1475	-1.34769	0.747779	-1.80225	0.0715056	1	53.0801	30.7464	4.66792	47.9122	32.4786	0
C52692_c0_seq1_	novel protein [Danio rerio] emb	22.6029	-1.35029	0.749286	-1.80211	0.0715287	1	47.7721	26.7792	11.6698	20.7921	17.556	11.0482
C21566_c0_seq1_	PREDICTED: mitochondrial ornithine transporter 1-like [Oreochromis niloticus]	20.0685	-1.38407	0.768063	-1.80202	0.071542	1	43.5257	25.7873	1.16698	20.7921	25.4562	3.68273
C3225_c0_seq1_	PREDICTED: dihydrolipoyllysine-residue succinyltransferase component of 2-oxoglutarate dehydrogenase complex, mitochondrial-like [Apis mellifera]	279.915	1.01749	0.564653	1.80197	0.0715499	1	144.378	282.669	386.271	241.369	289.674	335.128
C124684_c0_seq1_	PREDICTED: disks large homolog 1-like isoform 1 [Oreochromis niloticus]	164.043	1.12299	0.623226	1.80189	0.0715622	1	98.729	122.986	210.057	106.672	184.338	261.474
C81326_c0_seq1_	PREDICTED: biorientation of chromosomes in cell division protein 1-like [Oreochromis niloticus]	149.834	1.27692	0.708701	1.80177	0.0715812	1	71.1273	121.994	273.073	84.0723	98.3137	250.425
C36604_c0_seq1_	PREDICTED: protein transport protein Sec16A [Danio rerio]	645.584	-0.971106	0.539042	-1.80154	0.0716179	1	922.532	713.119	450.455	601.162	764.564	421.672
C101652_c0_seq1_	PREDICTED: inositol 1,4,5-trisphosphate receptor type 3 [Gallus gallus]	18.2817	1.27317	0.707248	1.80018	0.0718319	1	0	12.8937	40.8443	9.04003	0.877801	46.0341
C9188_c0_seq1_	PREDICTED: TRAF3-interacting JNK-activating modulator-like [Danio rerio]	272.708	-1.07621	0.597948	-1.79983	0.0718868	1	434.195	197.372	285.91	349.849	193.994	174.929
C356327_c0_seq1_	novel protein similar to vertebrate dynein, cytoplasmic, heavy polypeptide 1 (DNCH1) [Danio rerio]	11.1254	1.39611	0.775746	1.7997	0.0719085	1	4.24641	6.94275	12.8368	6.32802	8.77801	27.6204
C228843_c0_seq1_	tubulin monoglycylase TTLL3 [Danio rerio] sp	15.1118	-1.38652	0.770505	-1.79949	0.0719407	1	21.232	14.8773	11.6698	21.6961	18.4338	2.76204
C52025_c0_seq1_	factor in the germline alpha [Parajulis poecilepterus]	386.324	-1.10512	0.614224	-1.79921	0.0719848	1	556.279	291.595	254.402	530.65	470.501	214.519
C18576_c0_seq1_	Rho GTPase-activating protein 18 [Salmo salar] gb	4.48646	-1.07496	0.597471	-1.79918	0.0719906	1	18.0472	0.991821	7.00188	0	0.877801	0
C48997_c0_seq1_	Serine/threonine-protein kinase 17B [Salmo salar] gb	57.8757	1.29683	0.720813	1.79913	0.0719985	1	14.8624	49.591	81.6886	85.8803	53.5458	61.6857
C19545_c0_seq1_	Shwachman-Bodian-Diamond syndrome protein homolog [Oncorhynchus mykiss]	715.663	-1.17938	0.655569	-1.79901	0.0720167	1	937.394	950.164	345.426	876.883	864.634	319.476
C95384_c0_seq1_	PREDICTED: ubiquitin carboxyl-terminal hydrolase 19-like [Oreochromis niloticus]	440.423	1.15246	0.640637	1.79893	0.0720297	1	253.723	453.262	544.98	207.017	480.157	703.401
C43940_c0_seq1_	cleavage and polyadenylation specificity factor subunit 3 [Salmo salar] gb	1580.15	-1.01634	0.565127	-1.79842	0.0721103	1	2231.49	1412.35	1204.32	2281.7	1384.29	966.716
C18139_c0_seq1_	HEXIM protein [Salmo salar] gb	833.26	1.08088	0.601047	1.79833	0.0721247	1	374.745	914.459	1227.66	637.322	897.99	947.381
C97623_c0_seq1_	PREDICTED: hypothetical protein LOC100698334 [Oreochromis niloticus]	91.2165	1.33022	0.739823	1.79803	0.0721721	1	39.2793	138.855	52.5141	34.3521	120.259	162.04
C28671_c0_seq1_	PREDICTED: lysine-specific demethylase 5C [Oreochromis niloticus]	1934.03	-0.809072	0.450029	-1.79782	0.0722051	1	2407.71	2073.9	1709.63	2139.78	1975.93	1297.24
C12649_c1_seq1_	Cathepsin D precursor [Salmo salar]	816.102	-0.89722	0.499186	-1.79737	0.0722776	1	1030.82	893.631	647.674	941.068	874.29	509.137
C14689_c0_seq1_	dyskerin [Salmo salar] gb	684.137	0.894598	0.49777	1.79721	0.0723022	1	461.797	674.438	843.727	582.178	610.949	931.73
C14670_c0_seq1_	Membrane-spanning 4-domains subfamily A member 4A [Osmerus mordax]	18.3725	-1.32217	0.735708	-1.79714	0.0723139	1	30.7865	16.861	15.1707	18.9841	21.0672	7.36545
C36118_c0_seq1_	radical S-adenosyl methionine domain containing 1 [Danio rerio]	26.6025	1.38922	0.773265	1.79656	0.072405	1	7.43121	22.8119	54.8481	10.848	15.8004	47.8754
C95593_c0_seq1_	PREDICTED: anoctamin-8-like [Danio rerio]	4.1791	-1.12318	0.625198	-1.79653	0.0724109	1	20.1704	0.991821	1.16698	0.904003	0	1.84136
C32346_c0_seq1_	PREDICTED: histone-lysine N-methyltransferase MLL2-like [Oreochromis niloticus]	31.577	1.33354	0.742297	1.79651	0.0724138	1	14.8624	39.6728	21.0057	15.3681	36.8676	61.6857
C19329_c0_seq1_	Twinfilin-1 [Salmo salar]	554.775	1.22431	0.681525	1.79642	0.072427	1	267.524	608.978	874.069	236.849	494.202	847.027
C14406_c0_seq1_	Estradiol 17-beta-dehydrogenase 12-B [Salmo salar] gb	174.257	-1.04654	0.582736	-1.7959	0.0725104	1	240.984	185.47	119.032	222.385	177.316	100.354
C34852_c0_seq1_	PREDICTED: active breakpoint cluster region-related protein-like [Oreochromis niloticus]	602.497	-0.965569	0.537676	-1.79582	0.0725232	1	883.253	784.53	493.633	526.13	521.414	406.021
C73664_c1_seq1_	PREDICTED: GTP-binding protein 8-like [Oreochromis niloticus]	833.565	0.943507	0.525418	1.79573	0.0725381	1	573.265	855.941	1014.11	654.498	686.44	1217.14
C14750_c1_seq1_	Amidophosphoribosyltransferase precursor [Salmo salar]	638.726	-1.08105	0.602029	-1.79568	0.0725449	1	852.466	640.716	401.441	923.892	675.029	338.811
C529825_c0_seq1_	PREDICTED: transmembrane protein 221-like [Danio rerio]	13.0655	1.39281	0.775858	1.79519	0.0726232	1	5.30801	7.93457	15.1707	5.42402	11.4114	33.1445
C3653_c4_seq1_	RecName: Full=Hydroxyacylglutathione hydrolase, mitochondrial; AltName: Full=Glyoxalase II; Short=Glx II; Flags: Precursor	812.973	-1.02279	0.569791	-1.79502	0.0726506	1	1176.25	772.628	549.648	1111.92	761.931	505.454
C183670_c0_seq1_	PREDICTED: probable methyltransferase-like protein 15-like [Oreochromis niloticus]	70.4029	1.11126	0.619095	1.79497	0.0726587	1	39.2793	61.4929	59.516	65.0882	93.9247	103.116
C29545_c1_seq1_	CASP8 associated protein 2 [Danio rerio]	1403.1	0.92784	0.516938	1.79488	0.0726733	1	968.181	1602.78	1512.41	1013.39	1300.02	2021.82
C40391_c0_seq1_	Zgc:110800 protein [Danio rerio]	162.343	-1.11097	0.618972	-1.79486	0.0726766	1	254.784	128.937	126.034	235.041	131.67	97.5922
C22907_c0_seq1_	PREDICTED: nicastrin [Oreochromis niloticus]	2059.18	0.785102	0.437447	1.79474	0.0726956	1	1526.58	1816.02	2170.58	2009.6	2061.95	2770.33
C264203_c0_seq1_	PREDICTED: 5-hydroxytryptamine receptor 1F-like [Oreochromis niloticus]	34.4166	1.37262	0.764805	1.79473	0.0726968	1	1.0616	55.542	4.66792	48.8162	43.0122	53.3995
C61625_c0_seq1_	Si:dkey-10p5.7 [Danio rerio]	3.59891	-0.971591	0.541447	-1.79443	0.0727438	1	16.9856	0.991821	0	3.61601	0	0
C51619_c0_seq1_	protein-tyrosine kinase 2-beta [Danio rerio] emb	104.238	1.36589	0.761235	1.7943	0.072765	1	41.4025	78.3538	183.216	22.6001	100.069	199.788
C10930_c0_seq1_	insulin-like growth factor II precursor [Oncorhynchus mykiss] sp	580.613	0.959156	0.534614	1.79411	0.0727959	1	332.281	666.504	648.841	437.538	678.54	719.973
C51706_c0_seq1_	sterol 26-hydroxylase, mitochondrial [Danio rerio] emb	7.46407	1.28566	0.716677	1.79392	0.0728257	1	1.0616	14.8773	2.33396	0.904003	3.5112	22.0964
C3077_c1_seq1_	PREDICTED: cytochrome c1, heme protein, mitochondrial-like isoform 1 [Oreochromis niloticus]	736.496	-1.31452	0.732838	-1.79374	0.072855	1	1067.97	785.522	205.389	1261.99	834.789	263.315
C7622_c4_seq1_	Fanconi anemia-associated protein of 24 kDa [Danio rerio] gb	50.5125	-1.19232	0.664767	-1.79359	0.0728792	1	72.1889	57.5256	32.6755	60.5682	56.1792	23.9377
C102422_c0_seq1_	PREDICTED: phosphatase and actin regulator 1-like [Oreochromis niloticus]	942.74	0.919632	0.512772	1.79345	0.0729003	1	636.961	974.96	938.252	687.043	1099.88	1319.34
C42355_c0_seq1_	COP9 signalosome complex subunit 1 [Danio rerio] gb	171.294	-0.956018	0.533125	-1.79323	0.0729357	1	230.368	180.511	134.203	188.033	187.849	106.799
C109755_c0_seq1_	PREDICTED: pre-mRNA 3'-end-processing factor FIP1-like [Oreochromis niloticus]	62.9463	1.12709	0.628552	1.79315	0.0729487	1	27.6016	59.5093	77.0207	68.7043	69.3463	75.4959
C60481_c0_seq1_	PREDICTED: cerebellar degeneration-related protein 2-like [Oreochromis niloticus]	88.5978	-1.26038	0.702974	-1.79293	0.0729845	1	142.255	55.542	128.368	115.712	48.279	41.4307
C52820_c1_seq1_	PREDICTED: transcription factor Maf-like [Oreochromis niloticus]	4.45221	1.29366	0.721578	1.79282	0.0730014	1	0	2.97546	4.66792	2.71201	4.389	11.9689
C95740_c0_seq1_	PREDICTED: complement C1q tumor necrosis factor-related protein 2-like [Oreochromis niloticus]	24.9089	-1.3892	0.774868	-1.79282	0.0730021	1	33.9713	30.7464	50.1802	8.13603	24.5784	1.84136
C79038_c1_seq1_	PREDICTED: retrotransposable element Tf2 155 kDa protein type 1-like [Danio rerio]	6.63031	-1.30071	0.725555	-1.79271	0.0730196	1	22.2936	0.991821	9.33585	1.80801	3.5112	1.84136
C6370_c2_seq1_	probable arylformamidase [Salmo salar] sp	41.4794	1.37313	0.766084	1.7924	0.0730696	1	21.232	27.771	28.0075	12.656	57.9348	101.275
C41488_c1_seq1_	PREDICTED: neuroplastin-like [Oreochromis niloticus]	5.06419	1.10889	0.618671	1.79238	0.0730726	1	0	1.98364	1.16698	0	7.90021	19.3343
C107317_c0_seq1_	FMVIB [Morone saxatilis]	166.1	-0.929191	0.518429	-1.79232	0.0730814	1	238.86	139.847	182.049	165.433	156.249	114.165
C26025_c0_seq1_	PREDICTED: low-density lipoprotein receptor-related protein 6 isoform 2 [Oreochromis niloticus]	476.115	1.01243	0.564879	1.7923	0.0730855	1	290.879	564.346	362.931	367.025	602.171	669.335
C17102_c3_seq1_	preimplantation protein 4-like [Danio rerio] emb	81.3116	1.2076	0.673776	1.79228	0.0730874	1	44.5873	97.1984	84.0226	39.7762	86.0245	136.261
C18044_c0_seq1_	PREDICTED: putative synaptogyrin-2 like protein-like [Oreochromis niloticus]	176.638	-1.25868	0.702312	-1.79219	0.0731023	1	263.277	221.176	65.3509	241.369	192.238	76.4166
C3199_c3_seq1_	IKKbeta [Siniperca chuatsi]	83.1198	1.37021	0.764682	1.79187	0.0731542	1	21.232	76.3702	186.717	27.1201	67.5907	119.689
C7028_c0_seq1_	Tetraspanin-9 [Oncorhynchus mykiss] gb	883.537	0.894276	0.499079	1.79185	0.0731565	1	533.986	852.966	826.222	868.747	1140.26	1079.04
C13974_c0_seq1_	PREDICTED: extended synaptotagmin-1-like [Danio rerio]	9.02732	1.36099	0.759544	1.79184	0.0731579	1	2.1232	4.9591	8.16886	1.80801	13.167	23.9377
C21277_c0_seq1_	SH3 domain-containing kinase-binding protein 1 [Salmo salar] gb	37.7778	-1.32635	0.740282	-1.79168	0.0731849	1	43.5257	47.6074	35.0094	61.4722	29.8452	9.20682
C12515_c0_seq1_	membrane protein p24B precursor [Oncorhynchus mykiss] emb	102.765	1.1662	0.651034	1.7913	0.0732454	1	50.9569	126.953	141.205	64.1842	86.9023	146.388
C32135_c0_seq1_	PREDICTED: WW domain-binding protein 11-like [Oreochromis niloticus]	1599.63	-0.941589	0.525714	-1.79107	0.0732826	1	2055.26	1780.32	1152.98	1742.01	1899.56	967.636
C7318_c0_seq1_	histidine triad nucleotide-binding protein 1 [Salmo salar] gb	8.78987	-1.24776	0.696804	-1.79069	0.0733435	1	27.6016	1.98364	0	9.94404	12.2892	0.920682
C43476_c0_seq1_	PREDICTED: F-box only protein 5-like [Oreochromis niloticus]	1301.95	-1.06666	0.595681	-1.79066	0.0733478	1	1951.22	1091.99	1108.63	1947.22	919.935	792.707
C23042_c1_seq1_	PREDICTED: fumarylacetoacetate hydrolase domain-containing protein 2-like [Oreochromis niloticus]	17.2245	1.38345	0.77263	1.79057	0.0733622	1	1.0616	25.7873	19.8387	5.42402	25.4562	25.7791
C4959_c2_seq1_	PREDICTED: hypothetical protein LOC100702728 isoform 2 [Oreochromis niloticus]	151.118	-1.17197	0.654528	-1.79056	0.0733636	1	248.415	196.381	176.214	117.52	81.6355	86.5441
C11765_c2_seq1_	AN1-type zinc finger protein 6 [Salmo salar] gb	7348.85	-0.788463	0.440349	-1.79054	0.0733669	1	9619.17	7169.87	6895.69	8394.58	6731.85	5281.95
C2101_c1_seq1_	zinc finger protein 9 [Salmo salar] gb	926.531	-0.909019	0.507738	-1.79033	0.0734007	1	1264.37	751.8	895.074	1176.11	854.978	616.857
C15549_c3_seq1_	tissue factor precursor [Oncorhynchus mykiss] emb	95.909	-1.06873	0.596971	-1.79025	0.0734137	1	143.316	105.133	66.5179	111.192	91.2913	58.0029
C39079_c2_seq1_	PREDICTED: c-Jun-amino-terminal kinase-interacting protein 4-like [Oreochromis niloticus]	126.341	0.941623	0.526049	1.78999	0.0734552	1	77.4969	122.986	133.036	117.52	142.204	164.802
C18524_c0_seq1_	PREDICTED: RNA-binding motif, single-stranded-interacting protein 2-like [Oreochromis niloticus]	162.718	1.38436	0.773473	1.7898	0.0734858	1	64.7577	59.5093	369.933	73.2243	54.4236	354.462
C27127_c0_seq1_	PREDICTED: eukaryotic translation initiation factor 2-alpha kinase 1-like [Oreochromis niloticus]	563.536	1.17982	0.659291	1.78953	0.0735289	1	352.452	359.039	841.393	447.482	361.654	1019.19
C192382_c0_seq1_	unnamed protein product [Tetraodon nigroviridis]	17.8449	1.36703	0.763902	1.78953	0.0735292	1	1.0616	28.7628	25.6736	2.71201	17.556	31.3032
C34549_c0_seq1_	PREDICTED: NACHT, LRR and PYD domains-containing protein 12 [Danio rerio]	424.858	-0.928595	0.519012	-1.78916	0.0735894	1	547.787	357.056	526.308	477.314	379.21	261.474
C78808_c0_seq1_	PREDICTED: protein FAM116A-like [Oreochromis niloticus]	253.966	1.12034	0.626347	1.78869	0.073665	1	140.131	313.415	297.58	134.697	265.096	372.876
C516_c0_seq1_	40S ribosomal protein SA [Salmo salar] sp	463.505	-1.1263	0.629903	-1.78806	0.0737664	1	573.265	575.256	271.906	629.186	519.658	211.757
C20968_c0_seq1_	NFU1 iron-sulfur cluster scaffold homolog [Salmo salar] gb	41.5464	1.30326	0.7289	1.78799	0.0737782	1	19.1088	34.7137	60.683	18.9841	42.1344	73.6545
C28439_c0_seq1_	39S ribosomal protein L52, mitochondrial precursor [Salmo salar]	92.372	-1.26623	0.708372	-1.78751	0.0738545	1	108.283	145.798	79.3547	59.6642	131.67	29.4618
C103806_c0_seq1_	PREDICTED: 1-acyl-sn-glycerol-3-phosphate acyltransferase alpha-like [Oreochromis niloticus]	323.099	1.05103	0.588062	1.78729	0.0738912	1	232.491	320.358	330.256	205.209	291.43	558.854
C8819_c2_seq1_	PREDICTED: cysteine-rich hydrophobic domain 1 protein-like [Oreochromis niloticus]	36.8264	-1.20354	0.673467	-1.78708	0.0739247	1	54.1417	26.7792	39.6773	42.4882	40.3788	17.4929
C9301_c4_seq1_	Serine/threonine-protein phosphatase 2B catalytic subunit gamma isoform [Salmo salar] gb	425.776	-1.02792	0.575207	-1.78704	0.0739304	1	611.483	530.624	266.072	461.946	423.978	260.553
C132121_c0_seq1_	uncharacterized protein LOC567061 [Danio rerio] emb	2.41147	-1.03434	0.578818	-1.78699	0.0739386	1	10.616	0	1.16698	1.80801	0.877801	0
C76329_c0_seq1_	unnamed protein product [Tetraodon nigroviridis]	133.642	-1.03577	0.57962	-1.78698	0.0739409	1	183.657	137.863	100.36	174.473	128.159	77.3372
C29056_c0_seq1_	emopamil binding protein-like [Danio rerio]	124.859	-1.28003	0.716426	-1.78668	0.0739887	1	200.643	120.01	43.1783	182.609	147.471	55.2409
C54414_c0_seq1_	Membrane-associated tyrosine-and threonine-specific cdc2-inhibitory kinase [Dicentrarchus labrax]	2058.07	0.886718	0.496329	1.78655	0.0740101	1	1427.85	1628.57	2343.3	1794.45	2293.69	2860.56
C161780_c0_seq1_	PREDICTED: ras-related protein Rab-20-like [Oreochromis niloticus]	205.639	-1.20593	0.675041	-1.78645	0.0740265	1	280.263	246.963	93.3585	267.585	255.44	90.2268
C37553_c0_seq1_	thyroid hormone receptor beta [Pseudopleuronectes americanus]	6.13486	1.28226	0.717797	1.78639	0.0740364	1	1.0616	0.991821	1.16698	7.23203	7.02241	19.3343
C146651_c0_seq1_	PREDICTED: hypothetical protein LOC100698488 [Oreochromis niloticus]	101.51	-1.20557	0.675052	-1.78589	0.074117	1	106.16	151.749	107.362	120.232	90.4135	33.1445
C21814_c0_seq1_	magnesium transporter NIPA4 [Danio rerio] gb	44.4123	-1.38512	0.77562	-1.78583	0.0741273	1	109.345	12.8937	18.6717	95.8244	13.167	16.5723
C169535_c0_seq1_	PREDICTED: hypothetical protein LOC555985 [Danio rerio]	113.861	1.33835	0.749513	1.78563	0.0741592	1	19.1088	87.2802	109.696	137.409	224.717	104.958
C9382_c0_seq1_	EF-hand domain-containing protein D2 [Salmo salar] gb	620.591	0.995848	0.557797	1.78532	0.0742089	1	452.242	557.403	718.86	446.578	530.192	1018.27
C81298_c1_seq1_	PREDICTED: pre-mRNA-splicing factor ATP-dependent RNA helicase PRP16-like [Oreochromis niloticus]	38.6443	-1.30752	0.732426	-1.78518	0.0742314	1	62.6345	32.7301	17.5047	52.4322	50.9124	15.6516
C57282_c0_seq1_	SJCHGC04011 protein [Schistosoma japonicum]	3.00145	1.20594	0.675563	1.78509	0.0742472	1	0	1.98364	2.33396	1.80801	1.7556	10.1275
C52119_c0_seq1_	PREDICTED: 5'-AMP-activated protein kinase subunit gamma-2-like [Oreochromis niloticus]	42.8406	1.36403	0.764352	1.78456	0.0743326	1	18.0472	12.8937	57.1821	22.6001	57.9348	88.3854
C101119_c0_seq1_	All-1 related protein [Takifugu rubripes]	49.9497	1.28577	0.72051	1.78453	0.0743374	1	19.1088	82.3211	26.8406	43.3922	55.3014	72.7338
C98868_c0_seq1_	PREDICTED: similar to receptor-interacting serine-threonine kinase 2 [Taeniopygia guttata]	10.0988	-1.3419	0.751985	-1.78448	0.0743461	1	25.4784	1.98364	3.50094	19.8881	7.90021	1.84136
C1074_c0_seq1_	desmin [Oncorhynchus mykiss]	12.6629	-1.35427	0.759059	-1.78415	0.0743995	1	27.6016	7.93457	3.50094	29.8321	5.2668	1.84136
C93170_c0_seq1_	Wilms tumor 1 associated protein-like [Salmo salar] gb	665.472	0.890231	0.498978	1.78411	0.0744059	1	455.427	540.542	813.386	630.994	636.406	916.078
C25766_c1_seq1_	PREDICTED: serine/threonine-protein kinase N2 [Danio rerio]	4.06709	1.26624	0.709773	1.78401	0.074422	1	1.0616	2.97546	1.16698	2.71201	1.7556	14.7309
C7917_c0_seq1_	PREDICTED: band 4.1-like protein 4B [Oreochromis niloticus]	89.48	-1.1726	0.657305	-1.78395	0.0744324	1	141.193	81.3293	57.1821	132.889	75.4909	48.7961
C77786_c0_seq1_	Bsc1p [Saccharomyces cerevisiae S288c] sp	2.62774	-0.81438	0.456524	-1.78387	0.0744448	1	14.8624	0	0	0.904003	0	0
C86931_c0_seq1_	PREDICTED: kinesin light chain 2 [Oreochromis niloticus]	512.21	0.859193	0.481673	1.78377	0.0744614	1	350.329	587.158	549.648	444.77	458.212	683.146
C37021_c0_seq1_	PREDICTED: BAG family molecular chaperone regulator 4 [Danio rerio] emb	139.219	-1.16164	0.651233	-1.78375	0.0744636	1	229.306	97.1984	129.535	205.209	93.0469	81.02
C21326_c0_seq1_	PREDICTED: kynurenine 3-monooxygenase-like [Oreochromis niloticus]	25.5079	-1.332	0.746863	-1.78346	0.0745107	1	38.2177	28.7628	12.8368	29.8321	35.112	8.28613
C127272_c0_seq1_	PREDICTED: dual specificity tyrosine-phosphorylation-regulated kinase 2-like [Oreochromis niloticus]	205.514	0.893856	0.501231	1.78332	0.0745338	1	149.686	212.25	187.884	192.553	188.727	301.984
C37284_c0_seq1_	DEAD (Asp-Glu-Ala-Asp) box polypeptide 17 [Homo sapiens]	9.77428	1.38081	0.774473	1.7829	0.0746028	1	2.1232	11.9019	9.33585	8.13603	9.65581	17.4929
C147720_c0_seq1_	PREDICTED: hypothetical protein LOC100691159 [Oreochromis niloticus]	86.6509	1.055	0.591735	1.78289	0.0746045	1	60.5113	74.3866	82.8556	74.1283	81.6355	146.388
C40931_c0_seq1_	PREDICTED: AT-rich interactive domain-containing protein 2 [Oreochromis niloticus]	528.577	-0.913348	0.512333	-1.78272	0.0746316	1	747.368	626.831	462.124	416.746	555.648	362.749
C30347_c0_seq1_	brix domain containing 2 [Salmo salar] gb	58.6046	-1.37702	0.772619	-1.78228	0.0747035	1	93.421	19.8364	77.0207	122.04	24.5784	14.7309
C16147_c1_seq1_	transcription factor ETV6 [Salmo salar] gb	378.042	-1.03038	0.578125	-1.78227	0.0747047	1	544.602	307.464	495.967	425.786	263.34	231.091
C6109_c0_seq1_	5-aminolevulinate synthase, nonspecific, mitochondrial precursor [Salmo salar]	1140.94	1.15069	0.645777	1.78186	0.0747714	1	650.762	929.336	1846.16	671.675	934.858	1812.82
C8767_c1_seq1_	PREDICTED: ras GTPase-activating protein-binding protein 2-like [Oreochromis niloticus]	852.195	-1.02462	0.57507	-1.78173	0.0747934	1	1055.23	1025.54	592.826	1130.91	859.367	449.293
C15331_c0_seq1_	PREDICTED: AP-2 complex subunit alpha-2-like isoform 2 [Danio rerio]	6.13206	1.29727	0.728219	1.78143	0.0748417	1	1.0616	7.93457	2.33396	0.904003	6.14461	18.4136
C88541_c0_seq1_	WD repeat-containing protein 34 [Danio rerio] gb	450.119	-0.935141	0.524987	-1.78127	0.0748691	1	598.743	493.927	327.922	523.418	473.135	283.57
C97581_c0_seq1_	PREDICTED: brefeldin A-inhibited guanine nucleotide-exchange protein 2 [Oreochromis niloticus]	89.0518	1.16217	0.6525	1.7811	0.0748953	1	46.7105	129.929	56.0151	77.7443	90.4135	133.499
C702_c0_seq1_	40S ribosomal protein S9 [Salmo salar] gb	131.731	-1.36523	0.766507	-1.7811	0.0748958	1	199.581	183.487	28.0075	248.601	94.8025	35.9066
C75547_c0_seq1_	PREDICTED: hypothetical protein LOC100693215 [Oreochromis niloticus]	402.843	-0.878498	0.493352	-1.78067	0.0749661	1	594.497	403.671	323.254	402.282	394.133	299.221
C107224_c1_seq1_	PREDICTED: NACHT, LRR and PYD domains-containing protein 3-like [Oreochromis niloticus]	68.4203	-1.26568	0.71081	-1.78062	0.0749752	1	110.407	56.5338	42.0113	120.232	50.0346	31.3032
C7114_c0_seq1_	dolichyl-diphosphooligosaccharide--protein glycosyltransferase subunit DAD1 [Oncorhynchus mykiss] ref	121.975	1.29635	0.728234	1.78013	0.0750545	1	41.4025	119.019	221.726	49.7202	135.181	164.802
C108570_c0_seq1_	PREDICTED: FERM domain-containing protein 6-like [Oreochromis niloticus]	269.31	-0.939191	0.527599	-1.78012	0.0750563	1	334.405	306.473	225.227	326.345	265.974	157.437
C7238_c0_seq1_	Mannose-6-phosphate receptor-binding protein 1 [Salmo salar] gb	52.8563	1.38179	0.776282	1.78002	0.0750732	1	2.1232	91.2475	67.6849	32.5441	71.9797	51.5582
C2162_c6_seq1_	PREDICTED: myotubularin-related protein 5-like [Oreochromis niloticus]	421.726	-1.16616	0.655211	-1.77983	0.0751035	1	629.53	396.728	198.387	601.162	485.424	219.122
C29520_c2_seq1_	PREDICTED: USP6 N-terminal-like protein-like [Oreochromis niloticus]	92.832	-1.08175	0.607799	-1.77979	0.0751108	1	132.7	105.133	63.017	91.3043	112.358	52.4788
C5717_c0_seq1_	PREDICTED: serine/threonine-protein phosphatase 6 regulatory ankyrin repeat subunit C-like [Oreochromis niloticus]	213.246	1.03007	0.57876	1.77979	0.075111	1	143.316	261.841	166.878	213.345	157.126	336.969
C10841_c6_seq1_	CNDP dipeptidase 2 (metallopeptidase M20 family) [Danio rerio]	128.347	-1.37488	0.7725	-1.77978	0.0751122	1	233.552	99.1821	23.3396	287.473	86.0245	40.51
C16808_c3_seq1_	PREDICTED: AP-1 complex subunit gamma-1 [Oreochromis niloticus]	1469.44	0.892804	0.501649	1.77974	0.0751185	1	1004.28	1724.78	1272.01	1164.36	1624.81	2026.42
C190406_c0_seq1_	PREDICTED: similar to predicted protein [Ciona intestinalis]	28.9351	-1.3789	0.77494	-1.77937	0.0751793	1	66.8809	8.92639	21.0057	60.5682	7.02241	9.20682
C55327_c3_seq1_	PREDICTED: helicase SKI2W isoform 1 [Oreochromis niloticus]	37.4969	-1.21486	0.682851	-1.7791	0.0752233	1	53.0801	30.7464	32.6755	51.5282	40.3788	16.5723
C27743_c0_seq1_	chemokine CXCL14 [Oncorhynchus mykiss]	20.1264	-1.31344	0.73853	-1.77846	0.0753288	1	40.3409	17.8528	22.1726	14.4641	15.8004	10.1275
C53660_c0_seq1_	PREDICTED: LOW QUALITY PROTEIN: nuclear mitotic apparatus protein 1-like [Ailuropoda melanoleuca]	2224.6	0.806088	0.4533	1.77827	0.0753598	1	1558.43	2037.2	2254.61	2599.01	2010.16	2888.18
C99941_c0_seq1_	PREDICTED: sideroflexin-5-like [Oreochromis niloticus]	58.5804	1.26643	0.712181	1.77824	0.075364	1	31.8481	47.6074	85.1896	29.8321	46.5234	110.482
C270517_c0_seq1_	LOC556175 protein [Danio rerio]	7.98406	-1.37751	0.774778	-1.77794	0.0754139	1	16.9856	9.91821	5.8349	5.42402	7.90021	1.84136
C3301_c0_seq1_	24 kDa egg lectin [Oncorhynchus tshawytscha]	203.844	-1.3803	0.776373	-1.77788	0.0754237	1	221.875	303.497	35.0094	336.289	310.741	15.6516
C28425_c0_seq1_	PREDICTED: spectrin beta chain, brain 1-like [Oreochromis niloticus]	76.6991	1.03351	0.58136	1.77774	0.0754471	1	39.2793	85.2966	80.5217	79.5523	81.6355	93.9095
C25_c159_seq1_	PREDICTED: dynein heavy chain domain-containing protein 1-like [Danio rerio]	45.9475	-1.27212	0.715618	-1.77765	0.0754609	1	64.7577	50.5829	23.3396	65.0882	54.4236	17.4929
C18433_c2_seq1_	Serine/threonine-protein kinase 17A [Salmo salar]	3848.21	0.992347	0.558263	1.77756	0.0754759	1	2311.11	3660.81	3328.23	2975.98	5603	5210.14
C19060_c0_seq1_	unnamed protein product [Tetraodon nigroviridis]	234.841	-1.0247	0.576508	-1.77742	0.0754994	1	338.651	227.127	199.554	322.729	176.438	144.547
C34835_c0_seq1_	cytokine receptor family member b2 [Danio rerio]	155.961	1.22449	0.688923	1.77739	0.0755035	1	87.0514	159.683	175.047	178.089	59.6905	276.204
C50546_c0_seq1_	Apoptosis regulator BAX [Salmo salar]	153.556	-1.05326	0.59259	-1.77738	0.075505	1	236.737	155.716	145.873	186.225	99.1915	97.5922
C181630_c0_seq1_	cell division cycle 25 homolog d [Danio rerio] gb	17.8558	-1.32415	0.745261	-1.77676	0.0756086	1	31.8481	12.8937	17.5047	22.6001	14.9226	7.36545
C364_c2_seq1_	60S ribosomal protein L5 [Salmo salar]	29.284	-1.37688	0.775034	-1.77654	0.0756436	1	43.5257	47.6074	7.00188	32.5441	39.501	5.52409
C14284_c0_seq1_	goliath homolog [Danio rerio] gb	24.1294	-1.37434	0.773791	-1.77612	0.0757138	1	35.0329	41.6565	8.16886	30.7361	24.5784	4.60341
C11950_c1_seq1_	LRP1 [Takifugu rubripes]	223.903	-0.957044	0.538892	-1.77595	0.0757416	1	320.604	161.667	240.398	251.313	221.206	148.23
C241054_c0_seq1_	tubulin monoglycylase TTLL3 [Danio rerio] sp	8.79613	-1.35327	0.762039	-1.77585	0.0757579	1	18.0472	15.8691	4.66792	3.61601	9.65581	0.920682
C9773_c7_seq1_	PREDICTED: nucleoporin NUP188 homolog [Oreochromis niloticus]	256.312	-1.23969	0.698126	-1.77575	0.0757747	1	444.811	225.143	121.366	433.018	178.194	135.34
C35487_c0_seq1_	PREDICTED: apoptotic protease-activating factor 1-like [Oreochromis niloticus]	31.4211	1.26528	0.712565	1.77567	0.0757877	1	11.6776	42.6483	37.3434	31.6401	21.945	43.272
C67627_c0_seq1_	PREDICTED: F-box only protein 48-like [Oreochromis niloticus]	74.5742	-1.12529	0.633752	-1.7756	0.0757988	1	97.6674	63.4765	63.017	104.864	82.5133	35.9066
C65092_c0_seq1_	Methyltransferase-like protein 6 [Salmo salar] gb	708.5	1.00207	0.564464	1.77526	0.0758558	1	395.978	549.469	627.836	1013.39	759.298	905.03
C58241_c0_seq1_	PREDICTED: crossover junction endonuclease MUS81-like [Oreochromis niloticus]	445.385	-0.950833	0.535628	-1.77517	0.0758694	1	669.871	319.366	396.773	508.954	465.234	312.111
C28498_c0_seq1_	PREDICTED: uncharacterized protein C6orf62 homolog [Oreochromis niloticus]	180.442	0.998026	0.562254	1.77504	0.0758905	1	125.269	161.667	173.88	131.985	206.283	283.57
C84895_c0_seq1_	PREDICTED: kinesin-like protein KIF13B-like [Oreochromis niloticus]	152.645	1.02188	0.575769	1.77481	0.0759291	1	96.6058	189.438	131.869	160.913	111.481	225.567
C66022_c0_seq1_	CC058 protein precursor [Salmo salar] gb	361.6	-0.878802	0.49517	-1.77475	0.0759393	1	476.659	378.876	290.578	371.545	412.566	239.377
C32957_c0_seq1_	novel protein similar to vertebrate TBC1 domain family proteins [Danio rerio]	28.2022	1.36467	0.768939	1.77474	0.0759411	1	1.0616	50.5829	26.8406	6.32802	43.89	40.51
C98331_c0_seq1_	K1456 protein [Salmo salar] gb	180.527	0.988621	0.557092	1.77461	0.0759623	1	91.2978	166.626	207.723	197.977	213.306	206.233
C96411_c0_seq1_	PREDICTED: CD109 antigen-like [Oreochromis niloticus]	101.756	-1.16735	0.65791	-1.77434	0.0760072	1	159.24	92.2393	152.874	89.4963	61.4461	55.2409
C11141_c1_seq1_	myotubularin-related protein 12 [Danio rerio] sp	321.053	-1.28958	0.726797	-1.77433	0.0760084	1	619.976	186.462	150.541	585.794	215.061	168.485
C24771_c0_seq1_	PREDICTED: piggyBac transposable element-derived protein 5-like [Oreochromis niloticus]	3.78954	1.21264	0.683548	1.77403	0.0760575	1	0	0.991821	3.50094	4.52002	1.7556	11.9689
C179178_c0_seq1_	probable serine protease HTRA3 precursor [Danio rerio] gb	14.8422	-1.269	0.71549	-1.7736	0.0761286	1	35.0329	16.861	4.66792	30.7361	1.7556	0
C106270_c0_seq1_	5'-nucleotidase domain-containing protein 2 [Danio rerio] gb	31.3154	-1.37421	0.774904	-1.77339	0.0761644	1	73.2505	32.7301	4.66792	39.7762	24.5784	12.8895
C23860_c0_seq1_	PREDICTED: type II inositol-1,4,5-trisphosphate 5-phosphatase [Oreochromis niloticus]	877.096	-0.904412	0.510177	-1.77274	0.0762714	1	1254.81	682.373	815.719	1073.96	821.621	614.095
C53893_c1_seq1_	PREDICTED: E3 ubiquitin-protein ligase TRIM33-like [Oreochromis niloticus]	50.7494	1.13816	0.64216	1.77239	0.0763296	1	24.4168	54.5501	61.85	56.0482	39.501	68.1304
C52541_c0_seq1_	PREDICTED: lysine-specific demethylase 4C-like [Oreochromis niloticus]	122.235	-1.19686	0.675396	-1.77208	0.0763806	1	157.117	118.027	68.8519	179.897	158.882	50.6375
C19700_c0_seq1_	B-cell lymphoma 6 protein homolog [Salmo salar] gb	245.813	-1.18548	0.668975	-1.77208	0.0763807	1	281.325	367.966	169.212	207.921	356.387	92.0682
C68613_c0_seq1_	beta-hexosaminidase subunit beta [Salmo salar] gb	433.288	1.15137	0.649886	1.77165	0.0764532	1	187.904	548.477	583.49	231.425	513.513	534.916
C40204_c0_seq1_	neogenin precursor [Danio rerio] gb	188.437	1.19048	0.672086	1.77131	0.0765084	1	106.16	125.961	306.916	123.848	150.104	317.635
C29002_c2_seq1_	unnamed protein product [Tetraodon nigroviridis]	420.831	-0.940025	0.53074	-1.77116	0.076534	1	511.692	353.088	525.141	494.49	400.277	240.298
C135622_c0_seq1_	PREDICTED: zinc finger protein 91-like [Anolis carolinensis]	11.1851	1.36744	0.77209	1.77109	0.0765459	1	2.1232	10.91	11.6698	2.71201	16.6782	23.017
C326317_c0_seq1_	proteophosphoglycan 5 [Leishmania major strain Friedlin] emb	9.84361	-1.28501	0.72567	-1.77079	0.076595	1	29.7249	0	10.5028	10.848	6.14461	1.84136
C134316_c0_seq1_	PREDICTED: bromodomain and WD repeat-containing protein 3 [Oreochromis niloticus]	227.491	1.00082	0.565245	1.77059	0.0766291	1	130.577	293.579	249.734	164.529	228.228	298.301
C49126_c2_seq1_	tyrosine hydroxylase 1 [Lates calcarifer]	3.78914	1.09189	0.616725	1.77046	0.0766504	1	0	0.991821	3.50094	0	3.5112	14.7309
C74309_c0_seq1_	PREDICTED: IQ domain-containing protein E [Danio rerio]	22.0597	1.33837	0.755957	1.77043	0.0766558	1	1.0616	23.8037	25.6736	1.80801	39.501	40.51
C202860_c0_seq1_	PREDICTED: enhancer of mRNA-decapping protein 3-like [Oreochromis niloticus]	39.7953	1.36472	0.770934	1.77021	0.0766922	1	3.18481	42.6483	61.85	43.3922	51.7902	35.9066
C96768_c1_seq1_	PREDICTED: chromodomain-helicase-DNA-binding protein 6-like [Oreochromis niloticus]	23.3799	-1.25008	0.706198	-1.77016	0.0767003	1	38.2177	24.7955	19.8387	25.3121	21.0672	11.0482
C31656_c1_seq1_	unnamed protein product [Tetraodon nigroviridis]	242.461	-0.998815	0.564325	-1.76993	0.076739	1	355.637	225.143	183.216	321.825	212.428	156.516
C144710_c0_seq1_	IGF-I receptor subtype a [Cyprinus carpio]	53.4787	1.12934	0.638073	1.76992	0.07674	1	9.55442	75.3784	1.16698	8.13603	15.8004	210.836
C17304_c0_seq1_	PREDICTED: histidyl-tRNA synthetase, cytoplasmic-like isoform 2 [Oreochromis niloticus]	95.715	-1.32004	0.745827	-1.7699	0.0767431	1	150.747	61.4929	45.5122	204.305	77.2465	34.9859
C89162_c0_seq1_	PREDICTED: disco-interacting protein 2 homolog A [Oreochromis niloticus]	22.5653	1.34077	0.757755	1.7694	0.0768267	1	10.616	25.7873	21.0057	9.04003	21.0672	47.8754
C364012_c0_seq1_	PREDICTED: cholecystokinin receptor-like [Oreochromis niloticus]	4.11586	1.2403	0.700986	1.76936	0.0768335	1	0	5.95093	2.33396	1.80801	2.6334	11.9689
C210276_c0_seq1_	Abhd2a protein [Danio rerio]	38.7515	1.37238	0.775691	1.76924	0.076854	1	1.0616	42.6483	67.6849	23.5041	56.1792	41.4307
C59973_c0_seq1_	PREDICTED: hypothetical protein LOC794003, partial [Danio rerio]	273.885	1.33287	0.753367	1.76922	0.0768576	1	93.421	320.358	443.453	54.2402	303.719	428.117
C61521_c0_seq1_	PREDICTED: MAP7 domain-containing protein 2-like [Oreochromis niloticus]	12.2631	-1.33829	0.756437	-1.7692	0.0768603	1	30.7865	2.97546	4.66792	27.1201	5.2668	2.76204
C10503_c2_seq1_	unnamed protein product [Tetraodon nigroviridis]	65.3248	1.34166	0.758347	1.76919	0.0768624	1	18.0472	122.986	22.1726	51.5282	85.1467	92.0682
C43435_c0_seq1_	tudor and KH domain-containing protein [Danio rerio] gb	1288.54	-1.10028	0.621955	-1.76906	0.076884	1	1999	887.68	871.735	1968.92	1233.31	770.61
C145829_c0_seq1_	Slc35d1a protein [Danio rerio]	317.683	0.961382	0.543454	1.76902	0.0768902	1	203.828	400.696	324.421	231.425	301.963	443.768
C79807_c0_seq1_	fish virus induced TRIM protein [Oncorhynchus mykiss]	18.86	-1.355	0.766083	-1.76874	0.076937	1	33.9713	1.98364	21.0057	28.0241	26.334	1.84136
C1014_c5_seq1_	PREDICTED: hypothetical protein LOC567638 isoform 2 [Danio rerio] ref	3128.47	1.24106	0.701677	1.7687	0.0769432	1	1957.59	1491.7	4727.44	1790.83	2418.34	6384.93
C10841_c1_seq1_	Smad4a [Oncorhynchus mykiss]	93.9763	0.978101	0.553072	1.76849	0.0769793	1	56.2649	99.1821	108.529	90.4003	84.2689	125.213
C15924_c0_seq1_	DNA-damage-inducible transcript 4-like [Salmo salar] gb	1695.81	-1.35435	0.765935	-1.76824	0.0770213	1	3935.36	662.536	644.173	3402.67	679.418	850.71
C80698_c1_seq1_	PREDICTED: rho-related BTB domain-containing protein 2-like [Oreochromis niloticus]	22.5251	-1.36691	0.773113	-1.76806	0.0770511	1	29.7249	32.7301	9.33585	29.8321	29.8452	3.68273
C97181_c0_seq1_	LOC733188 protein [Xenopus laevis]	15.499	-1.22363	0.692247	-1.76762	0.0771247	1	41.4025	0.991821	2.33396	29.8321	18.4338	0
C7552_c0_seq1_	Growth hormone-inducible transmembrane protein [Osmerus mordax]	242.517	-0.878754	0.49719	-1.76744	0.0771545	1	360.945	209.274	240.398	229.617	233.495	181.374
C1385_c0_seq1_	Ywhab1 protein [Danio rerio]	784.919	-0.832764	0.471264	-1.76709	0.0772139	1	1099.82	841.064	634.837	762.075	793.532	578.188
C9884_c1_seq1_	UPF0139 membrane protein C19orf56 homolog [Salmo salar] gb	294.655	-1.3164	0.745073	-1.76681	0.0772606	1	452.242	302.505	78.1877	561.386	267.729	105.878
C155751_c0_seq1_	PREDICTED: brain-specific angiogenesis inhibitor 1-associated protein 2-like [Oreochromis niloticus]	17.4792	1.36953	0.775182	1.76672	0.0772745	1	1.0616	21.8201	24.5066	8.13603	26.334	23.017
C175211_c1_seq1_	PREDICTED: zinc finger protein basonuclin-2-like [Oreochromis niloticus]	6.37062	1.31016	0.741811	1.76616	0.077369	1	1.0616	5.95093	1.16698	9.04003	3.5112	17.4929
C92531_c0_seq1_	PREDICTED: lateral signaling target protein 2 homolog [Oreochromis niloticus]	216.594	-0.948008	0.536904	-1.76569	0.0774473	1	265.4	244.98	183.216	265.777	216.817	123.371
C68187_c0_seq1_	CobIyrinic acid a,c-diamide adenosyltransferase, mitochondrial precursor [Oncorhynchus mykiss]	217.827	-1.112	0.629787	-1.76567	0.0774512	1	317.419	207.291	122.533	309.169	230.862	119.689
C83172_c2_seq1_	PREDICTED: DNA excision repair protein ERCC-6 [Oreochromis niloticus]	106.481	-1.10257	0.624494	-1.76555	0.0774721	1	135.885	99.1821	85.1896	159.105	107.969	51.5582
C9053_c0_seq1_	Para-nitrobenzyl esterase [Salmo salar] gb	21.0718	1.32696	0.751591	1.76553	0.0774741	1	2.1232	1.98364	45.5122	6.32802	27.2118	43.272
C226630_c0_seq1_	PREDICTED: tudor domain-containing protein 6-like [Oreochromis niloticus]	39.9909	1.27685	0.723316	1.76527	0.0775178	1	14.8624	68.4356	40.8443	27.1201	31.6008	57.0823
C18861_c2_seq1_	PREDICTED: transmembrane protein 131 [Danio rerio]	64.8828	1.29882	0.735812	1.76515	0.0775386	1	35.0329	39.6728	68.8519	86.7843	25.4562	133.499
C18531_c2_seq1_	PREDICTED: tankyrase-1-like [Oreochromis niloticus]	764.24	0.91171	0.516563	1.76495	0.0775715	1	523.37	840.072	711.858	555.058	876.045	1079.04
C58570_c0_seq1_	C-terminal-binding protein 1 [Danio rerio] gb	30.8693	-1.36448	0.773176	-1.76477	0.0776028	1	62.6345	26.7792	16.3377	58.7602	9.65581	11.0482
C92677_c0_seq1_	PREDICTED: biorientation of chromosomes in cell division protein 1-like [Oreochromis niloticus]	372.277	1.15095	0.652184	1.76476	0.0776037	1	198.52	369.949	570.654	188.033	346.731	559.774
C11345_c0_seq1_	ankyrin repeat and KH domain-containing protein 1 [Danio rerio]	40.6831	-1.17926	0.66825	-1.76469	0.0776155	1	60.5113	55.542	37.3434	37.9681	32.4786	20.255
C233234_c0_seq1_	PREDICTED: dynein heavy chain 10, axonemal [Danio rerio]	89.9774	1.20524	0.682983	1.76468	0.0776179	1	47.7721	68.4356	137.704	87.6883	50.0346	148.23
C22167_c1_seq1_	Vacuolar proton pump subunit E 1 [Salmo salar]	177.281	-1.14532	0.649071	-1.76455	0.0776401	1	184.719	244.98	164.544	162.721	242.273	64.4477
C139388_c0_seq1_	PREDICTED: microtubule-associated serine/threonine-protein kinase 3-like [Oreochromis niloticus]	41.9898	1.36185	0.771804	1.7645	0.0776472	1	1.0616	58.5174	11.6698	62.3762	65.8351	52.4788
C23847_c1_seq1_	PREDICTED: dedicator of cytokinesis protein 1-like [Oreochromis niloticus]	1226.07	1.07927	0.611681	1.76443	0.0776596	1	715.52	1147.54	1812.32	714.163	1159.57	1807.3
C62825_c1_seq1_	PREDICTED: probable ATP-dependent RNA helicase DDX10 [Danio rerio]	270.635	1.34364	0.761683	1.76404	0.0777249	1	104.037	175.552	627.836	122.04	102.703	491.644
C22671_c1_seq1_	novel protein (zgc:153452) [Danio rerio]	49.7398	-1.30471	0.739671	-1.76391	0.0777471	1	100.852	70.4193	43.1783	39.7762	18.4338	25.7791
C126390_c0_seq1_	PREDICTED: protein O-linked-mannose beta-1,2-N-acetylglucosaminyltransferase 1-like [Oreochromis niloticus]	1228.42	0.786205	0.445733	1.76385	0.0777576	1	908.731	1185.23	1072.46	1199.61	1350.06	1654.46
C185946_c0_seq1_	PREDICTED: protocadherin Fat 4 [Oreochromis niloticus]	147.702	-0.967317	0.548439	-1.76376	0.0777716	1	208.074	113.068	159.876	138.313	172.049	94.8302
C40125_c0_seq1_	PREDICTED: ATP-binding cassette sub-family B member 7, mitochondrial-like [Oreochromis niloticus]	2215.68	0.979007	0.55511	1.76363	0.0777948	1	1404.5	2086.79	1724.8	1812.53	3142.53	3122.95
C151_c61_seq1_	Annexin A4 [Salmo salar]	359.35	-1.31112	0.743425	-1.76362	0.0777956	1	492.583	319.366	105.028	683.427	441.534	114.165
C136772_c0_seq1_	PREDICTED: potassium voltage-gated channel subfamily H member 7-like [Oreochromis niloticus]	109.524	-1.25027	0.708946	-1.76356	0.0778055	1	216.567	112.076	43.1783	140.121	80.7577	64.4477
C11956_c0_seq1_	PREDICTED: CD209 antigen-like [Oreochromis niloticus]	14.9353	-1.32768	0.752844	-1.76355	0.0778079	1	29.7249	17.8528	1.16698	15.3681	24.5784	0.920682
C2667_c0_seq1_	hypothetical protein AND 22917 [Anopheles darlingi]	75.8067	-1.12623	0.638652	-1.76344	0.0778259	1	112.53	75.3784	46.6792	82.2643	96.5581	41.4307
C54861_c0_seq1_	Vasa [Oncorhynchus mykiss] dbj	34.368	-1.35019	0.765751	-1.76322	0.0778636	1	49.8953	52.5665	5.8349	45.2002	51.7902	0.920682
C45222_c1_seq1_	PREDICTED: TBC1 domain family member 9 isoform 2 [Danio rerio]	7815.99	0.779523	0.44212	1.76315	0.0778753	1	6046.88	7238.31	8298.4	7015.97	7356.85	10939.5
C169458_c0_seq1_	PREDICTED: protein PTHB1, partial [Danio rerio]	104.196	-1.36074	0.771888	-1.76287	0.0779223	1	231.429	59.5093	29.1745	216.057	43.89	45.1134
C152745_c0_seq1_	PREDICTED: papilin-like [Oreochromis niloticus]	54.8037	-1.11725	0.633834	-1.76269	0.0779534	1	72.1889	58.5174	43.1783	63.2802	64.9573	26.6998
C288041_c0_seq1_	PREDICTED: cGMP-dependent protein kinase 2-like [Danio rerio]	44.8172	-1.26645	0.718502	-1.76262	0.0779643	1	73.2505	55.542	19.8387	58.7602	41.2566	20.255
C46750_c0_seq1_	Septin-11 [Macaca fascicularis]	1353.73	0.797184	0.452326	1.76241	0.0779999	1	959.688	1316.15	1588.26	1252.95	1239.45	1765.87
C41184_c1_seq1_	PREDICTED: AMP deaminase 2 [Oreochromis niloticus]	3.08162	1.12901	0.64068	1.7622	0.078035	1	0	0.991821	4.66792	0.904003	0.877801	11.0482
C80578_c0_seq1_	PREDICTED: mucosa-associated lymphoid tissue lymphoma translocation protein 1 [Oreochromis niloticus]	175.954	1.04152	0.591103	1.76199	0.0780702	1	90.2362	211.258	135.37	164.529	236.128	218.202
C11180_c0_seq1_	PREDICTED: sodium- and chloride-dependent creatine transporter 1-like [Oreochromis niloticus]	115.766	0.980947	0.556806	1.76174	0.0781133	1	74.3121	124.969	126.034	87.6883	115.87	165.723
C297670_c0_seq1_	PREDICTED: dynein heavy chain 10, axonemal [Danio rerio]	24.6092	1.28785	0.731047	1.76165	0.0781287	1	10.616	17.8528	30.3415	30.7361	16.6782	41.4307
C10596_c0_seq1_	C18orf37 [Osmerus mordax]	103.64	-1.20274	0.682812	-1.76145	0.0781627	1	165.61	84.3048	67.6849	174.473	76.3687	53.3995
C39261_c0_seq1_	ribonuclease P protein subunit p14 [Salmo salar] gb	24.6959	1.32623	0.752928	1.76143	0.0781657	1	1.0616	59.5093	24.5066	16.2721	2.6334	44.1927
C52556_c0_seq1_	PREDICTED: lysine-specific demethylase 5B-B-like [Oreochromis niloticus]	36.3898	-1.36713	0.776315	-1.76106	0.078229	1	85.9898	9.91821	11.6698	74.1283	22.8228	13.8102
C27945_c0_seq1_	hypothetical protein EAI 14210 [Harpegnathos saltator]	258.409	-0.983474	0.558511	-1.76089	0.0782575	1	352.452	210.266	346.593	273.913	209.794	157.437
C161992_c0_seq1_	novel protein [Danio rerio]	57.594	-1.26647	0.719232	-1.76087	0.0782611	1	61.5729	77.362	60.683	43.3922	86.9023	15.6516
C17211_c0_seq1_	Alanine--glyoxylate aminotransferase 2, mitochondrial precursor [Salmo salar]	5.15703	1.22861	0.697803	1.76068	0.0782929	1	0	5.95093	2.33396	0.904003	7.02241	14.7309
C118832_c0_seq1_	PREDICTED: RNA-binding protein MEX3D-like [Oreochromis niloticus]	1860.73	0.912705	0.518388	1.76066	0.078296	1	1308.96	2133.41	1674.62	1329.79	2015.43	2702.2
C111152_c0_seq1_	PREDICTED: ras-related GTP-binding protein C-like [Oreochromis niloticus]	472.806	0.823541	0.467813	1.76041	0.0783386	1	345.021	488.968	464.458	394.146	493.324	650.922
C327_c16_seq1_	selenoprotein L [Oncorhynchus mykiss]	62.0959	-1.28248	0.728652	-1.76008	0.0783945	1	80.6817	84.3048	26.8406	85.8803	74.6131	20.255
C163049_c1_seq1_	PREDICTED: similar to synaptonemal complex protein 2-like [Danio rerio]	291.741	1.08717	0.617707	1.76	0.0784075	1	157.117	336.227	423.614	185.321	244.906	403.259
C49130_c0_seq1_	PREDICTED: myb-binding protein 1A-like protein-like [Oreochromis niloticus]	19.0825	1.33968	0.761183	1.75999	0.0784092	1	4.24641	11.9019	30.3415	0.904003	21.0672	46.0341
C12381_c6_seq1_	PREDICTED: HEAT repeat-containing protein 5B [Oreochromis niloticus]	7.1461	-1.30765	0.743168	-1.75956	0.0784823	1	18.0472	3.96728	1.16698	11.752	7.02241	0.920682
C11288_c0_seq1_	PREDICTED: tuftelin-like [Oreochromis niloticus]	89.7435	1.23274	0.700665	1.75938	0.0785131	1	36.0945	79.3457	123.7	45.2002	131.67	122.451
C87576_c0_seq1_	PREDICTED: protein CASC5-like [Oreochromis niloticus]	681.614	-1.09155	0.620422	-1.75937	0.0785144	1	898.115	620.88	487.798	1133.62	602.171	347.097
C20055_c0_seq1_	GrpE protein homolog 1, mitochondrial precursor [Salmo salar]	117.16	-1.30517	0.741861	-1.75932	0.0785233	1	161.363	165.634	33.8424	143.737	160.638	37.7479
C2824_c18_seq1_	PREDICTED: RING finger protein 145-like [Oreochromis niloticus]	599.999	-0.962656	0.547181	-1.7593	0.0785267	1	905.546	436.401	597.494	747.611	497.713	415.227
C58732_c1_seq1_	Transcription factor Sp1 [Dicentrarchus labrax]	221.829	-0.928385	0.527722	-1.75923	0.0785387	1	260.092	271.759	208.89	237.753	229.106	123.371
C139316_c0_seq1_	PREDICTED: transcription factor AP-2 gamma-like [Oreochromis niloticus]	19.9782	1.35352	0.769421	1.75915	0.0785529	1	5.30801	10.91	44.3453	3.61601	9.65581	46.0341
C49107_c0_seq1_	Nucleolar protein 11-like [Salmo salar] gb	230.432	-1.16488	0.662315	-1.75879	0.0786125	1	369.437	208.282	109.696	338.097	229.106	127.975
C61325_c0_seq1_	PREDICTED: RCC1 and BTB domain-containing protein 1 [Oreochromis niloticus]	563.268	1.08116	0.614896	1.75829	0.0786989	1	312.111	642.7	653.509	295.609	682.051	793.627
C64703_c0_seq1_	PREDICTED: ubiquitin-like modifier-activating enzyme 6-like [Oreochromis niloticus]	10.4935	1.33649	0.760213	1.75805	0.0787397	1	2.1232	3.96728	22.1726	6.32802	3.5112	24.8584
C125697_c1_seq1_	PREDICTED: zinc finger protein 281-like [Oreochromis niloticus]	285.503	-1.12362	0.639173	-1.75793	0.0787592	1	454.366	190.43	184.383	422.17	293.185	168.485
C55213_c0_seq1_	novel protein similar to vertebrate 3-hydroxyisobutyrate dehydrogenase (HIBADH) (zgc:100804) [Danio rerio]	335.481	-1.09857	0.624936	-1.75789	0.0787662	1	475.598	395.737	183.216	456.522	319.519	182.295
C187316_c0_seq1_	PREDICTED: calcium-activated potassium channel subunit alpha-1-like [Meleagris gallopavo]	4.42334	-0.736977	0.419313	-1.75758	0.0788187	1	26.54	0	0	0	0	0
C141742_c0_seq1_	PREDICTED: hypothetical protein LOC100690310 [Oreochromis niloticus]	3.49984	-1.16337	0.661937	-1.75753	0.0788278	1	11.6776	1.98364	1.16698	0.904003	5.2668	0
C132373_c1_seq1_	MBP/AhlA fusion protein [synthetic construct]	415.32	-1.0076	0.573333	-1.75745	0.0788417	1	616.791	274.734	550.815	377.873	403.788	267.918
C360485_c0_seq1_	RecName: Full=Cytochrome P450 26A1; AltName: Full=Cytochrome P450RAI; AltName: Full=Retinoic acid 4-hydroxylase; AltName: Full=Retinoic acid-metabolizing cytochrome gb	63.006	-1.28327	0.730241	-1.75732	0.0788633	1	119.961	52.5665	21.0057	75.0323	77.2465	32.2239
C4305_c4_seq1_	PREDICTED: hypothetical protein LOC100536712 [Danio rerio] ref	932.345	-1.29679	0.737974	-1.75723	0.078878	1	1125.3	1206.05	270.74	1374.09	1351.81	266.077
C94035_c0_seq1_	Rho-related GTP-binding protein RhoE [Salmo salar] gb	7.11162	-1.32001	0.751275	-1.75703	0.0789133	1	20.1704	2.97546	10.5028	5.42402	1.7556	1.84136
C60646_c0_seq1_	PREDICTED: leucine-rich repeat-containing protein 59-like [Oreochromis niloticus]	186.12	1.08036	0.615314	1.75578	0.0791262	1	83.8665	226.135	238.064	132.889	220.328	215.439
C52739_c0_seq1_	novel protein similar to vertebrate ATP-binding cassette, sub-family D (ALD) family [Danio rerio]	347.4	-1.31583	0.749723	-1.75509	0.0792431	1	707.027	145.798	173.88	690.659	194.872	172.167
C150117_c0_seq1_	unnamed protein product [Tetraodon nigroviridis]	26.1588	-1.31364	0.748654	-1.75467	0.0793155	1	31.8481	21.8201	24.5066	42.4882	29.8452	6.44477
C59498_c1_seq1_	novel protein [Danio rerio]	672.62	0.90662	0.516741	1.7545	0.0793455	1	452.242	738.907	592.826	512.57	810.21	928.968
C125821_c0_seq1_	cysteine/serine-rich nuclear protein 1 [Danio rerio] gb	159.94	0.971018	0.553513	1.75428	0.079382	1	96.6058	161.667	179.715	119.328	188.727	213.598
C327842_c0_seq1_	PREDICTED: centrosome and spindle pole-associated protein 1 [Xenopus (Silurana) tropicalis]	108.073	1.35829	0.77439	1.75402	0.0794271	1	1.0616	123.978	191.385	97.6324	121.137	113.244
C54976_c0_seq1_	Sulfatase-modifying factor 2 precursor [Salmo salar]	18.9072	-1.3453	0.767002	-1.75397	0.0794358	1	24.4168	24.7955	23.3396	11.752	25.4562	3.68273
C18948_c0_seq1_	PREDICTED: UDP-glucose 6-dehydrogenase-like [Oreochromis niloticus]	12.146	-1.35349	0.771745	-1.7538	0.0794651	1	19.1088	18.8446	4.66792	12.656	16.6782	0.920682
C26286_c1_seq1_	PREDICTED: transmembrane emp24 domain-containing protein 5-like [Oreochromis niloticus]	467.71	1.00684	0.574119	1.75372	0.079479	1	321.665	479.049	555.483	293.801	416.955	739.307
C14107_c0_seq1_	Methylcrotonoyl-CoA carboxylase subunit alpha, mitochondrial precursor [Salmo salar]	171.313	-1.06975	0.610077	-1.75347	0.0795215	1	211.259	182.495	129.535	254.025	166.782	83.782
C74_c1_seq1_	NADH dehydrogenase subunit 2 [Oncorhynchus mykiss] gb	359651	0.809126	0.461496	1.75327	0.0795561	1	226269	346597	391150	343064	429144	421683
C63090_c0_seq1_	PREDICTED: zinc finger protein ZXDC-like [Oreochromis niloticus]	655.097	-0.93165	0.531463	-1.75299	0.0796038	1	800.448	853.958	513.471	696.987	687.318	378.4
C25466_c2_seq1_	PREDICTED: hypothetical protein LOC100702650 [Oreochromis niloticus]	2.98196	1.15124	0.656733	1.75298	0.0796047	1	1.0616	0.991821	1.16698	0.904003	0.877801	12.8895
C80086_c1_seq1_	thiosulfate sulfurtransferase KAT [Esox lucius]	54.638	-1.35734	0.774423	-1.75271	0.0796516	1	128.454	39.6728	7.00188	81.3603	47.4012	23.9377
C30727_c0_seq1_	Transcription initiation factor IIB [Salmo salar] gb	135.002	-1.34923	0.769838	-1.75262	0.0796674	1	132.7	299.53	59.516	110.288	190.483	17.4929
C270421_c0_seq1_	PREDICTED: uncharacterized protein C9orf135-like [Xenopus (Silurana) tropicalis]	36.8471	1.21419	0.692819	1.75253	0.0796828	1	21.232	25.7873	29.1745	45.2002	32.4786	67.2098
C39930_c0_seq1_	F-box/LRR-repeat protein 14 [Salmo salar]	10.3892	1.33746	0.763257	1.75231	0.0797201	1	1.0616	7.93457	19.8387	2.71201	10.5336	20.255
C20367_c2_seq1_	55 kDa erythrocyte membrane protein [Salmo salar] gb	7.35374	1.30574	0.745278	1.75202	0.079771	1	2.1232	1.98364	11.6698	3.61601	2.6334	22.0964
C3352_c0_seq1_	Eukaryotic translation initiation factor 3 subunit C [Salmo salar]	415.803	-0.826127	0.471539	-1.75198	0.0797771	1	531.863	354.08	460.957	418.554	448.556	280.808
C6444_c0_seq1_	PREDICTED: HEAT repeat-containing protein 7A [Oreochromis niloticus]	955.869	1.27906	0.73007	1.75198	0.079778	1	266.462	1132.66	513.471	687.947	2059.32	1075.36
C43269_c0_seq1_	CRE-DAO-5 protein [Caenorhabditis remanei] gb	320.062	-1.19106	0.679872	-1.75189	0.0797933	1	494.706	239.029	152.874	517.09	354.632	162.04
C39740_c0_seq1_	Coronin-1C i3 protein [Homo sapiens]	176.107	-0.909233	0.519009	-1.75186	0.0797975	1	233.552	182.495	148.207	209.729	169.416	113.244
C17329_c1_seq1_	asparagine synthetase [Salmo salar] gb	14.2171	-1.35829	0.775366	-1.75181	0.0798065	1	19.1088	15.8691	9.33585	18.0801	21.0672	1.84136
C10588_c7_seq1_	protein kinase C alpha type [Danio rerio]	21.1992	1.35018	0.770747	1.75178	0.0798116	1	3.18481	30.7464	15.1707	18.0801	34.2342	25.7791
C22425_c1_seq1_	Calcium and integrin-binding protein 1 [Oncorhynchus mykiss] gb	946.753	-0.890537	0.508401	-1.75164	0.0798351	1	1270.74	1001.74	683.851	1092.04	1003.33	628.825
C1441_c0_seq1_	ATP synthase subunit O, mitochondrial precursor [Salmo salar] gb	110.868	-1.25888	0.718753	-1.75147	0.0798649	1	163.487	119.019	38.5104	142.833	156.249	45.1134
C19919_c0_seq1_	roundabout-like protein 4 [Danio rerio]	70.0018	-1.22967	0.702098	-1.75143	0.0798727	1	77.4969	76.3702	120.199	63.2802	60.5683	22.0964
C66242_c0_seq1_	KIAA0179 [Osmerus mordax]	765.318	0.947819	0.541213	1.75129	0.0798967	1	510.631	781.555	997.768	611.106	593.393	1097.45
C8489_c0_seq1_	PREDICTED: ankyrin repeat domain-containing protein 40-like [Oreochromis niloticus]	95.9855	1.14133	0.651781	1.7511	0.0799284	1	47.7721	116.043	71.1858	67.8003	138.693	134.42
C598_c10_seq1_	cytoplasmic FMR1-interacting protein 1 homolog [Danio rerio] sp	3624.02	0.981113	0.560396	1.75075	0.0799889	1	2207.07	3671.72	5114.88	2518.55	3296.14	4935.77
C23352_c1_seq1_	PREDICTED: family with sequence similarity 116, member B [Oryctolagus cuniculus]	310.488	0.911004	0.520418	1.75052	0.0800282	1	202.766	272.751	372.267	249.505	346.731	418.91
C92552_c1_seq1_	RecName: Full=Hypermethylated in cancer 2 protein emb	319.723	1.02474	0.5856	1.7499	0.0801363	1	187.904	368.957	358.263	191.649	367.799	443.768
C122610_c0_seq1_	BRCA1-associated ATM activator 1 [Danio rerio] sp	55.4665	-1.05784	0.604523	-1.74988	0.0801391	1	79.6201	53.5583	63.017	57.8562	46.5234	32.2239
C229883_c0_seq1_	PREDICTED: oxidative stress-induced growth inhibitor 2 [Oreochromis niloticus]	123.311	1.29993	0.74321	1.74908	0.0802779	1	61.5729	87.2802	228.728	55.1442	64.0795	243.06
C7727_c0_seq1_	citrate synthase [Lates calcarifer]	132.915	-1.1832	0.676515	-1.74896	0.0802983	1	135.885	145.798	197.22	170.857	104.458	43.272
C38813_c1_seq1_	RNA-binding protein 7 [Osmerus mordax]	16.8502	1.35651	0.775652	1.74886	0.080315	1	1.0616	10.91	28.0075	15.3681	24.5784	21.1757
C1644_c0_seq1_	Leukotriene A-4 hydrolase [Salmo salar] gb	440.9	-1.12907	0.645709	-1.74858	0.0803638	1	627.407	476.074	233.396	683.427	396.766	228.329
C604_c29_seq1_	protein NDRG2 [Danio rerio] sp	11.928	-1.35478	0.774836	-1.74847	0.080382	1	16.9856	18.8446	8.16886	10.848	15.8004	0.920682
C81489_c0_seq1_	Mitochondrial chaperone BCS1 [Salmo salar]	25.6808	-1.26199	0.721813	-1.74836	0.0804018	1	57.3265	0.991821	4.66792	52.4322	37.7454	0.920682
C176940_c0_seq1_	PREDICTED: hypothetical protein LOC100701375 [Oreochromis niloticus]	138.961	-1.13542	0.649665	-1.74771	0.0805151	1	273.893	140.839	113.197	123.848	81.6355	100.354
C9513_c2_seq1_	PREDICTED: serine/threonine-protein phosphatase 6 regulatory ankyrin repeat subunit A [Gallus gallus]	178.904	-0.9651	0.552263	-1.74754	0.0805444	1	280.263	134.888	151.707	190.745	187.849	127.975
C62530_c0_seq1_	unnamed protein product [Tetraodon nigroviridis]	22.2273	-1.31387	0.75187	-1.74746	0.0805569	1	44.5873	38.681	17.5047	0.904003	29.8452	1.84136
C88282_c1_seq1_	PREDICTED: zinc transporter 10-like [Danio rerio]	9.44111	-1.34512	0.769754	-1.74746	0.0805573	1	20.1704	11.9019	2.33396	7.23203	13.167	1.84136
C44522_c1_seq1_	anoctamin 5b [Danio rerio] gb	15.3781	-1.35604	0.776053	-1.74736	0.0805753	1	18.0472	14.8773	21.0057	18.9841	18.4338	0.920682
C23759_c0_seq1_	PREDICTED: pleckstrin homology domain-containing family A member 1-like [Oreochromis niloticus]	81.987	-1.02656	0.587503	-1.74732	0.0805817	1	109.345	92.2393	64.1839	96.7284	83.3911	46.0341
C253_c33_seq1_	39S ribosomal protein L12, mitochondrial precursor [Osmerus mordax]	336.896	-1.34495	0.76983	-1.74707	0.080625	1	460.735	449.295	46.6792	447.482	539.847	77.3372
C88610_c0_seq1_	snRNA-activating protein complex subunit 1 [Danio rerio] gb	19.861	-1.34753	0.771312	-1.74706	0.0806273	1	26.54	13.8855	15.1707	37.0641	22.8228	3.68273
C23876_c1_seq1_	PREDICTED: histone acetyltransferase MYST3-like [Oreochromis niloticus]	585.086	0.910282	0.521069	1.74695	0.0806458	1	415.086	578.232	480.796	468.274	711.896	856.234
C61728_c0_seq1_	PREDICTED: midasin [Danio rerio]	662.331	-0.957173	0.547937	-1.74687	0.0806603	1	944.826	520.706	892.74	653.594	527.558	434.562
C17454_c0_seq1_	PREDICTED: dimethyladenosine transferase 2, mitochondrial-like [Oreochromis niloticus]	310.929	0.88509	0.50676	1.74657	0.0807123	1	239.922	281.677	274.24	275.721	312.497	481.516
C9917_c0_seq1_	TAR DNA-binding protein 43 [Salmo salar]	1799.06	-0.779986	0.446592	-1.74653	0.0807192	1	2283.51	1730.73	1823.99	2097.29	1599.35	1259.49
C87758_c0_seq1_	PREDICTED: serine/threonine-protein phosphatase PGAM5, mitochondrial-like [Oreochromis niloticus]	5.73807	1.02594	0.587421	1.74652	0.0807203	1	3.18481	0	0	0.904003	0.877801	29.4618
C10785_c3_seq1_	SWI/SNF-related matrix-associated actin-dependent regulator of chromatin subfamily D member 2 [Dicentrarchus labrax]	46.5271	-1.19633	0.684981	-1.74652	0.0807211	1	74.3121	51.5747	32.6755	64.1842	32.4786	23.9377
C27037_c1_seq1_	Annexin A13 [Salmo salar]	1849.59	-0.890242	0.509725	-1.74651	0.0807216	1	2749.55	1698.99	1568.42	2229.27	1489.63	1361.69
C287994_c0_seq1_	PREDICTED: cohesin subunit SA-1-like [Oreochromis niloticus]	9.76671	-1.35516	0.77597	-1.74641	0.0807399	1	20.1704	13.8855	9.33585	5.42402	7.02241	2.76204
C49677_c0_seq1_	PREDICTED: zinc fingers and homeoboxes protein 3-like [Oreochromis niloticus]	76.605	-1.10302	0.631692	-1.74613	0.0807879	1	107.222	90.2557	70.0188	52.4322	99.1915	40.51
C76742_c0_seq1_	PREDICTED: transcription elongation factor B polypeptide 3-like [Oreochromis niloticus]	1572.05	-1.0746	0.615422	-1.74612	0.0807908	1	2780.34	1645.43	923.082	1849.59	1125.34	1108.5
C29144_c0_seq1_	unnamed protein product [Tetraodon nigroviridis]	89.2989	-1.20173	0.68826	-1.74604	0.0808035	1	157.117	41.6565	108.529	109.384	68.4685	50.6375
C42688_c3_seq1_	PREDICTED: cullin-5-like isoform 2 [Oreochromis niloticus]	136.35	-1.02197	0.585372	-1.74585	0.0808378	1	171.98	128.937	106.195	161.817	176.438	72.7338
C122088_c0_seq1_	PREDICTED: oxysterol-binding protein-related protein 1-like [Oreochromis niloticus]	27.3293	-1.35025	0.773423	-1.74581	0.0808438	1	54.1417	13.8855	9.33585	70.5123	9.65581	6.44477
C139922_c0_seq1_	PREDICTED: MORN repeat-containing protein 2 [Danio rerio]	31.7845	1.28898	0.738366	1.74572	0.0808601	1	12.7392	35.7056	35.0094	13.5601	42.1344	51.5582
C48369_c0_seq1_	CL045 protein [Salmo salar] gb	28.6973	-1.33074	0.762492	-1.74525	0.0809411	1	66.8809	17.8528	46.6792	33.4481	0.877801	6.44477
C194293_c0_seq1_	PREDICTED: nuclear receptor-interacting protein 1-like [Oreochromis niloticus]	2.86211	-1.1667	0.668529	-1.74517	0.0809549	1	9.55442	1.98364	1.16698	2.71201	1.7556	0
C44483_c0_seq1_	PREDICTED: transmembrane protein 165-like [Oreochromis niloticus]	1420.85	-0.82801	0.474536	-1.74488	0.0810052	1	1915.13	1334.99	1312.85	1730.26	1222.78	1009.07
C29958_c1_seq1_	si:ch211-192p3.1 [Danio rerio] gb	183.183	1.18913	0.681519	1.74482	0.0810162	1	111.468	209.274	224.06	79.5523	138.693	336.049
C52348_c0_seq1_	Sulfatase-modifying factor 2 precursor [Salmo salar]	18.2624	1.33578	0.7656	1.74475	0.0810279	1	6.36961	12.8937	22.1726	26.2161	8.77801	33.1445
C71978_c0_seq1_	caspase recruitment domain-containing protein 9 [Salmo salar] gb	4.16387	-1.18313	0.678137	-1.74468	0.0810413	1	12.7392	1.98364	2.33396	0.904003	7.02241	0
C132420_c0_seq1_	SERAC1 [Salmo salar] gb	427.149	0.967013	0.55434	1.74444	0.0810822	1	289.817	341.186	511.138	476.41	307.23	637.112
C22_c5_seq1_	PREDICTED: rRNA promoter binding protein-like [Oryctolagus cuniculus]	415894	-1.34756	0.772568	-1.74425	0.0811146	1	607403	802336	752973	135988	95826	100839
C17449_c2_seq1_	PREDICTED: NSFL1 cofactor p47-like [Oreochromis niloticus]	596.111	1.04979	0.602041	1.74371	0.081209	1	340.774	589.142	897.408	383.297	532.825	833.217
C63602_c0_seq1_	PREDICTED: reticulon-4-interacting protein 1 homolog, mitochondrial-like [Oreochromis niloticus]	68.4794	-1.11836	0.641385	-1.74366	0.0812179	1	99.7906	58.5174	46.6792	78.6483	90.4135	36.8273
C3658_c0_seq1_	serum lectin 2 precursor [Salmo salar] gb	4965.56	-1.33567	0.766121	-1.74342	0.081261	1	11003.5	1603.77	3197.53	10097.7	1488.75	2402.06
C32409_c0_seq1_	tumor protein p53 binding protein [Oncorhynchus mykiss]	412.093	-0.819946	0.470322	-1.74337	0.0812688	1	480.906	439.377	435.284	452.906	409.055	255.029
C101540_c0_seq1_	unnamed protein product [Tetraodon nigroviridis]	28.0776	-1.3532	0.776247	-1.74326	0.0812883	1	37.1561	62.4847	33.8424	19.8881	11.4114	3.68273
C88705_c0_seq1_	PREDICTED: protein phosphatase 1 regulatory subunit 3A-like [Danio rerio]	6.06803	1.14392	0.65621	1.74322	0.0812944	1	1.0616	0.991821	10.5028	0	1.7556	22.0964
C47493_c0_seq1_	Mitochondrial 2-oxoglutarate/malate carrier protein [Salmo salar]	9.03363	-1.16043	0.665703	-1.74316	0.0813059	1	31.8481	17.8528	0	0.904003	1.7556	1.84136
C20738_c0_seq1_	Chain A, Crystal Structure Of Ubiquitin Conjugating Enzyme E2-25k pdb	28.392	-1.34482	0.771515	-1.74309	0.0813186	1	58.3881	16.861	10.5028	54.2402	19.3116	11.0482
C104958_c0_seq1_	PREDICTED: hypothetical protein LOC565521 [Danio rerio]	509.955	0.956447	0.548805	1.74278	0.0813721	1	388.546	418.548	539.145	494.49	376.577	842.424
C34665_c0_seq1_	Pleckstrin homology domain-containing family B member 2 [Salmo salar] gb	1664.75	0.827129	0.47463	1.74268	0.0813891	1	1186.87	1851.73	1669.95	1287.3	1741.56	2251.07
C29311_c0_seq1_	PREDICTED: protein VPRBP-like [Danio rerio]	447.235	-0.844996	0.484904	-1.74261	0.0814025	1	590.251	421.524	366.432	505.338	494.202	305.666
C61452_c0_seq1_	LETM1 domain-containing protein 1 [Danio rerio] gb	18.5188	-1.32929	0.763213	-1.7417	0.0815606	1	29.7249	33.7219	31.5085	10.848	4.389	0.920682
C108042_c0_seq1_	PREDICTED: rho GTPase-activating protein SYDE2-like [Oreochromis niloticus]	37.6776	-1.20594	0.692567	-1.74126	0.0816381	1	56.2649	39.6728	33.8424	53.3362	25.4562	17.4929
C73983_c1_seq1_	PREDICTED: SWI/SNF complex subunit SMARCC2 [Oreochromis niloticus]	7.354	-1.34215	0.770833	-1.74117	0.0816531	1	13.8008	6.94275	4.66792	8.13603	9.65581	0.920682
C23466_c2_seq1_	COMM domain-containing protein 4 [Salmo salar]	220.528	-1.06064	0.609349	-1.7406	0.0817531	1	308.926	271.759	124.867	242.273	251.051	124.292
C88134_c0_seq1_	PREDICTED: tubulin--tyrosine ligase-like protein 12-like [Oreochromis niloticus]	145.327	-1.17104	0.672874	-1.74036	0.0817957	1	205.951	149.765	68.8519	212.441	165.904	69.0511
C55528_c0_seq1_	PREDICTED: hypothetical protein LOC100690204 [Oreochromis niloticus]	20.7786	1.35086	0.776212	1.74033	0.081801	1	10.616	19.8364	21.0057	9.94404	5.2668	58.0029
C3654_c0_seq1_	lymphocyte G0/G1 switch protein 2 [Salmo salar]	9.56725	-1.22276	0.702631	-1.74025	0.0818146	1	30.7865	1.98364	10.5028	0	12.2892	1.84136
C33166_c0_seq1_	unnamed protein product [Kitasatospora setae KM-6054] dbj	84.3303	-1.01852	0.585314	-1.74012	0.0818374	1	123.146	89.2639	64.1839	76.8403	100.069	52.4788
C4592_c0_seq1_	Methionine-R-sulfoxide reductase B2, mitochondrial precursor [Salmo salar]	74.7626	1.01108	0.581161	1.73976	0.0819007	1	46.7105	61.4929	71.1858	87.6883	72.8575	108.64
C7137_c0_seq1_	Cytochrome b5 [Salmo salar]	101.854	1.26683	0.728334	1.73935	0.0819728	1	56.2649	100.174	144.706	72.3203	35.112	202.55
C153897_c0_seq1_	PREDICTED: afadin- and alpha-actinin-binding protein-like [Oreochromis niloticus]	8.0437	-1.17958	0.678259	-1.73912	0.0820129	1	24.4168	0.991821	1.16698	19.8881	0.877801	0.920682
C87946_c2_seq1_	PREDICTED: retrotransposable element Tf2 155 kDa protein type 1-like [Danio rerio]	9.80073	-1.24089	0.713541	-1.73906	0.0820238	1	36.0945	0	4.66792	10.848	3.5112	3.68273
C145896_c0_seq1_	PREDICTED: calmodulin-regulated spectrin-associated protein 2-like [Oreochromis niloticus]	8.38531	1.10703	0.636774	1.73849	0.0821241	1	2.1232	0	0	2.71201	11.4114	34.0652
C44798_c0_seq1_	PREDICTED: chromodomain-helicase-DNA-binding protein 4-like [Oreochromis niloticus]	120.676	1.02805	0.591391	1.73835	0.0821492	1	79.6201	100.174	145.873	85.8803	123.77	188.74
C14624_c0_seq1_	AP-2 complex subunit beta [Danio rerio] gb	797.116	-0.937745	0.539447	-1.73835	0.08215	1	1193.24	990.829	572.987	783.771	681.173	560.695
C40602_c0_seq1_	mitochondrial solute carrier family 25 member 25 isoform C [Osmerus mordax]	9847.56	1.11272	0.640253	1.73793	0.0822231	1	5000.14	12684.4	11396.7	4562.51	11978.5	13463.1
C61692_c1_seq1_	PREDICTED: angiomotin-like protein 2-like [Oreochromis niloticus]	574.787	-0.741879	0.426971	-1.73754	0.0822917	1	708.088	598.068	565.986	593.93	578.471	404.179
C165234_c0_seq1_	SCO4629 [Salmo salar] gb	16.3835	-1.32546	0.762888	-1.73742	0.0823127	1	27.6016	23.8037	2.33396	21.6961	21.945	0.920682
C33748_c0_seq1_	Leucine-rich repeat-containing protein 8D [Salmo salar]	7.17395	1.27967	0.736533	1.73742	0.0823129	1	0	8.92639	7.00188	1.80801	9.65581	15.6516
C204280_c0_seq1_	PREDICTED: MKL/myocardin-like protein 2 [Oreochromis niloticus]	60.7235	-1.29109	0.743109	-1.73742	0.0823138	1	125.269	26.7792	35.0094	98.5364	46.5234	32.2239
C37164_c2_seq1_	brain protein 16 [Salmo salar] gb	873.921	-1.0799	0.621593	-1.73731	0.0823319	1	1219.78	587.158	686.185	1422.9	850.589	476.913
C22610_c0_seq1_	PREDICTED: RNA-binding protein 45-like [Oreochromis niloticus]	221.079	-1.09823	0.632181	-1.7372	0.0823518	1	282.386	293.579	138.871	306.457	198.383	106.799
C58334_c1_seq1_	solute carrier family 25 member 46 [Danio rerio] sp	59.707	-1.28082	0.737356	-1.73704	0.0823797	1	55.2033	57.5256	60.683	88.5923	84.2689	11.9689
C16427_c5_seq1_	Cbp/p300-interacting transactivator 2 [Ctenopharyngodon idella]	392.987	1.28352	0.738967	1.73691	0.0824039	1	124.207	556.411	464.458	106.672	594.271	511.899
C8851_c1_seq1_	PREDICTED: alkylated DNA repair protein alkB homolog 1-like [Oreochromis niloticus]	611.262	-0.992169	0.571318	-1.73663	0.0824524	1	857.774	573.272	431.783	876.883	550.381	377.479
C22108_c0_seq1_	PREDICTED: SH3 domain-containing protein 19-like [Oreochromis niloticus]	539.63	-0.985123	0.567344	-1.73638	0.0824971	1	761.169	458.221	448.121	785.579	446.801	337.89
C11728_c0_seq1_	CNDP dipeptidase 2 (metallopeptidase M20 family) [Danio rerio]	196.204	-1.00223	0.577272	-1.73615	0.082537	1	259.031	145.798	171.546	258.545	229.984	112.323
C66618_c1_seq1_	PREDICTED: protein FAM135A-like [Oreochromis niloticus]	4158.53	0.834495	0.480687	1.73605	0.0825555	1	3150.83	4174.57	4555.89	3238.14	3811.41	6020.34
C32660_c0_seq1_	PREDICTED: trimeric intracellular cation channel type B-like [Oreochromis niloticus]	2632.68	-0.84458	0.486507	-1.73601	0.0825622	1	3599.89	2846.53	1947.69	2891	2646.57	1864.38
C43639_c2_seq1_	unnamed protein product [Tetraodon nigroviridis]	178.772	1.08154	0.62301	1.736	0.0825646	1	111.468	162.659	166.878	104.864	242.273	284.491
C5661_c0_seq1_	PREDICTED: nebulin-like [Oreochromis niloticus]	16.8957	-1.33265	0.767789	-1.7357	0.0826168	1	50.9569	16.861	1.16698	15.3681	9.65581	7.36545
C23725_c0_seq1_	39S ribosomal protein L20, mitochondrial precursor [Salmo salar]	990.948	-0.95515	0.550298	-1.7357	0.0826177	1	1410.87	991.821	717.693	1337.93	838.3	649.08
C31747_c0_seq1_	Nucleosome-remodeling factor subunit BPTF [Cricetulus griseus]	27.6825	-1.24415	0.716807	-1.73568	0.0826205	1	50.9569	30.7464	16.3377	22.6001	30.723	14.7309
C3498_c12_seq1_	PREDICTED: sodium- and chloride-dependent GABA transporter 2-like [Oreochromis niloticus]	13.7138	-1.32992	0.766235	-1.73566	0.0826248	1	24.4168	12.8937	19.8387	11.752	8.77801	4.60341
C19331_c1_seq1_	PREDICTED: guanine nucleotide-binding protein G(I)/G(S)/G(T) subunit beta-2 [Oreochromis niloticus]	44.6631	-1.20498	0.694344	-1.73543	0.082665	1	73.2505	50.5829	22.1726	52.4322	46.5234	23.017
C15175_c0_seq1_	PREDICTED: RNA-binding protein 38-like [Oreochromis niloticus]	23.6547	-1.33788	0.77093	-1.73541	0.0826674	1	45.6489	49.591	3.50094	28.9281	9.65581	4.60341
C276752_c0_seq1_	PREDICTED: centrosomal protein of 152 kDa-like [Danio rerio]	105.954	1.32365	0.763069	1.73464	0.0828041	1	19.1088	160.675	128.368	35.2561	179.071	113.244
[truncated: 42,991 more rows]

## Sheet: top 20
	gene	gene description	opis2	opis3	opos4	Genename	baseMean	log2FoldChange	lfcSE	stat	pvalue	padj	treated1.txt	treated2.txt	treated3.txt	untreated1.txt	untreated2.txt	untreated3.txt
16961	C29972_c2_seq1_	_PREDICTED:_protein_transport_protein_Sec31A-like_[Oreochromis_niloticus]	0	0	0	SEC31A	807.49	-2.19144	0.755809	-2.89947	0.00373796	1	1411.93	665.512	818.053	1073.05	793.532	82.8613
8255	C169673_c0_seq1_	_insulin-like_growth_factor_1b_receptor_[Oncorhynchus_kisutch]	0	0	0	igf1rb	66.7283	2.17286	0.776233	2.79924	0.00512233	1	7.43121	48.5992	60.683	49.7202	35.9898	197.947
29315	C63960_c0_seq1_	_PREDICTED:_telomere-associated_protein_RIF1_[Oreochromis_niloticus]	0	0	0	RIF1	383.985	2.04502	0.733263	2.78894	0.00528815	1	95.5442	414.581	360.597	230.521	352.876	849.789
6767	C153473_c0_seq1_	_IGF-I_receptor_subtype_a_[Cyprinus_carpio]	0	0	0	IGF1A	123.582	2.13467	0.76671	2.78419	0.00536614	1	22.2936	78.3538	144.706	91.3043	80.7577	324.08
36835	C9983_c0_seq1_	_PREDICTED:_FH1/FH2_domain-containing_protein_3_[Danio_rerio]	0	0	0	FHOD3	270.05	2.06055	0.741861	2.77755	0.0054771	1	50.9569	325.317	240.398	163.625	313.375	526.63
35686	C93043_c1_seq1_	_MAM_domain-containing_glycosylphosphatidylinositol_anchor_protein_1_[Dicentrarchus_labrax]	0	0	0	MDGA1	98.4029	2.09023	0.757585	2.75906	0.00579671	1	11.6776	104.141	114.364	89.4963	93.0469	177.692
36247	C96308_c0_seq1_	_PREDICTED:_centromere_protein_F_[Oreochromis_niloticus]	0	0	0	CENPF	1329.72	1.85353	0.673311	2.75286	0.0059078	1	406.594	1473.85	1256.84	1318.94	1195.56	2326.56
19666	C35448_c1_seq1_	_PREDICTED:_FH1/FH2_domain-containing_protein_3_[Oreochromis_niloticus]	0	0	0	FHOD3	362.463	1.99481	0.74566	2.67522	0.00746794	1	77.4969	404.663	374.601	158.201	419.589	740.228
32810	C78059_c0_seq1_	_PREDICTED:_histone-lysine_N-methyltransferase_SETD2-like_[Oreochromis_niloticus]	0	0	0	SETD2	606.503	2.03545	0.761834	2.67178	0.00754499	1	121.023	847.015	212.39	479.122	565.304	1414.17
21400	C39441_c0_seq1_	_Male-specific_lethal_3-like_1_[Salmo_salar]_gb	ACI33981.1	_Male-specific_lethal_3-like_1_[Salmo_salar]	0	MSL3	217.769	-1.92029	0.720745	-2.66431	0.00771472	1	350.329	259.857	179.715	280.241	191.361	45.1134
2447	C11690_c0_seq1_	_45_kDa_calcium-binding_protein_precursor_[Danio_rerio]_sp	Q7ZUC2.1	CAB45_DANRE_RecName:_Full=45_kDa_calcium-binding_protein;_Short=Cab45;_AltName:_Full=Stromal_cell-derived_factor_4;_Short=SDF-4;_Flags:_Precursor_gb	AAH49332.1	SDF4	438.629	2.05752	0.773085	2.66145	0.00778059	1	22.2936	570.297	586.991	424.882	286.163	741.149
6024	C14637_c0_seq1_	_PREDICTED:_5'-AMP-activated_protein_kinase_subunit_beta-2-like_[Oreochromis_niloticus]	0	0	0	PRKAB2	163.887	-1.93198	0.728409	-2.65234	0.00799369	1	284.509	173.569	114.364	158.201	217.695	34.9859
14330	C25332_c0_seq1_	_PREDICTED:_putative_phospholipase_B-like_2_isoform_1_[Oreochromis_niloticus]	0	0	0	PLBD2	257.5	2.00122	0.756466	2.64549	0.00815719	1	27.6016	218.201	378.102	327.249	207.161	386.686
17504	C31032_c0_seq1_	_PREDICTED:_glutamate-rich_WD_repeat-containing_protein_1-like_[Oreochromis_niloticus]	0	0	0	GRWD1	109.445	-1.97983	0.753823	-2.62638	0.00862972	1	173.041	137.863	84.0226	134.697	113.236	13.8102
26661	C54545_c0_seq1_	_PREDICTED:_tubulin_polyglutamylase_TTLL4_[Danio_rerio]	0	0	0	TTLL4	52.6326	2.02018	0.769234	2.62623	0.00863372	1	10.616	35.7056	47.8462	33.4481	49.1568	139.023
28172	C59768_c0_seq1_	_PREDICTED:_required_for_meiotic_nuclear_division_protein_1_homolog_[Oreochromis_niloticus]	0	0	0	RMND1	200.179	1.78193	0.678654	2.62568	0.00864764	1	64.7577	189.438	213.557	204.305	177.316	351.7
9265	C18236_c0_seq1_	_beta-sarcoglycan_[Danio_rerio]_gb	AAI03487.1	_Sarcoglycan,_beta_(dystrophin-associated_glycoprotein)_[Danio_rerio]_emb	CAN88274.1	SGCB	158.136	1.94368	0.741443	2.62148	0.00875496	1	35.0329	145.798	172.713	84.0723	202.772	308.428
36292	C96523_c0_seq1_	_Ras-like_protein_family_member_11A-like_[Esox_lucius]	0	0	0	RASL11A	213.417	1.97064	0.752488	2.61883	0.00882328	1	22.2936	216.217	210.057	277.529	260.707	293.697
15955	C28163_c0_seq1_	_glutathione_synthetase_[Danio_rerio]_gb	AAH83207.1	_Zgc:101574_[Danio_rerio]_gb	AAI65747.1	GSS	268.979	-1.85983	0.711457	-2.61411	0.00894592	1	468.166	285.644	168.045	291.993	330.053	69.9718
32213	C75169_c0_seq1_	_PREDICTED:_histone-lysine_N-methyltransferase_SETD2-like_[Oreochromis_niloticus]	0	0	0	SETD2	2587.87	1.77308	0.681476	2.60182	0.00927305	1	931.025	3139.11	1725.96	2278.99	2485.05	4967.08
